# Supplementary material for: Treatment of keratinocytes with 4-phenylbutyrate in epidermolysis bullosa: Lessons for therapies in keratin disorders
Source: PubMed Central journal article supplement — eBioMedicine. 2019 May 9;44:502–15. doi: 10.1016/j.ebiom.2019.04.062 (PMC6603805; doi:10.1016/j.ebiom.2019.04.062), 2019-05-09
Supplement: mmc1.pdf [file mmc1.pdf]

**Supplementary Table S1:** Shown are normalized, log2 transformed fold-changes of protein abundances comparing indicated cell types with an internal standard added to all samples (Super-SILAC mix). Cells were left untreated or treated with 4-PBA. The column "Peptides" indicates the number of identified peptides per protein. Identifications were filtered on a FDR smaller 1% using a decoy database.

| Ctrl1     |               | Ctrl2     |               | KRT14_1   |         | KRT14_2   |         | KRT5_1    |         | KRT5_2    |         | Peptides | Protein        |                         |
|-----------|---------------|-----------|---------------|-----------|---------|-----------|---------|-----------|---------|-----------|---------|----------|----------------|-------------------------|
| untreated | Ctrl1 treated | untreated | Ctrl2 treated | untreated | treated | untreated | treated | untreated | treated | untreated | treated |          | names          | Gene names              |
| -0.02     | 0.19          | -0.11     | 0.21          | -0.45     | -0.28   | -0.60     | -0.40   | -0.12     | 0.14    | -0.23     | 0.18    | 43       | Alanine--tRNA  | AARS                    |
| 0.03      | 0.07          | -0.01     | 0.12          | 0.07      | -0.05   | 0.11      | 0.03    | -0.08     | -0.10   | 0.10      | 0.04    | 20       | ATP-binding c  | ABCE1                   |
| 0.09      | -0.01         | -0.04     | -0.21         | -0.19     | 0.00    | 0.27      | 0.16    | 0.17      | 0.00    | 0.06      | -0.06   | 16       | ATP-binding c  | ABCF1                   |
| 0.08      | -0.03         | -0.03     | -0.53         | 0.10      | -0.08   | -0.07     | -0.57   | -0.14     | -0.28   | 0.12      | -0.01   | 18       | ATP-binding c  | ABCF2                   |
| 0.01      | 0.25          | 0.09      | -0.09         | 0.03      | -0.12   | -0.07     | -0.14   | -0.11     | -0.45   | 0.19      | 0.16    | 38       | Acetyl-CoA ca  | ACACA                   |
| -0.47     | -0.17         | 0.08      | 0.56          | 0.22      | 0.22    | -0.17     | 0.17    | -0.20     | -0.16   | 0.12      | 0.36    | 7        | Medium-chair   | ACADM                   |
| 0.18      | 0.49          | -0.30     | 0.25          | -0.15     | -0.08   | -0.91     | -0.78   | 0.09      | 0.02    | -0.29     | 0.29    | 12       | Very long-cha  | ACADVL                  |
| 0.40      | 0.73          | 0.01      | 0.16          | 0.02      | 0.07    | 0.17      | 0.20    | 0.00      | 0.04    | 0.13      | 0.21    | 16       | Acetyl-CoA ac  | ACAT1                   |
| 0.00      | -0.23         | 0.05      | -0.08         | -0.04     | 0.07    | -0.11     | -0.06   | -0.01     | 0.00    | -0.04     | -0.01   | 15       | Acetyl-CoA ac  | ACAT2                   |
| -0.07     | -0.19         | 0.05      | 0.76          | 0.04      | 0.00    | -0.41     | -0.15   | 0.14      | -0.17   | -0.07     | 0.01    | 5        | Golgi resident | ACBD3                   |
| 0.16      | 0.05          | 0.16      | 0.00          | 0.13      | -0.13   | -0.13     | -0.33   | 0.09      | -0.24   | 0.21      | -0.03   | 61       | ATP-citrate sy | ACLY                    |
| -0.16     | -0.02         | -0.06     | 0.03          | -0.25     | 0.30    | 0.10      | 0.01    | -0.23     | 0.02    | 0.16      | 0.51    | 11       | Cytoplasmic a  | ACO1                    |
| -0.02     | 0.26          | 0.15      | 0.26          | 0.06      | -0.14   | 0.13      | 0.29    | 0.06      | 0.12    | 0.08      | 0.16    | 20       | Aconitate hyd  | ACO2                    |
| 0.26      | 0.58          | 0.30      | 0.64          | -0.20     | 0.12    | 0.07      | 0.31    | 0.17      | 0.51    | -0.58     | -0.18   | 12       | Cytosolic acyl | ACOT7                   |
| 0.39      | 0.35          | 0.02      | -0.07         | 0.01      | 0.13    | 0.19      | 0.45    | 0.23      | 0.51    | 0.01      | 0.17    | 8        | Acyl-coenzym   | ACOT9                   |
| -0.05     | 0.08          | -0.04     | 0.18          | -0.16     | 0.02    | 0.07      | 0.17    | 0.21      | 0.13    | -0.04     | 0.14    | 6        | Low molecula   | ACP1                    |
| -0.14     | -0.01         | -0.24     | -0.01         | -0.05     | 0.37    | 0.15      | 0.46    | -0.27     | 0.11    | -0.02     | 0.36    | 20       | Long-chain-fa  | ACSL3                   |
| 0.16      | -0.31         | 0.64      | 0.17          | 0.39      | 0.48    | 0.35      | 0.21    | -0.47     | -0.37   | 0.65      | -0.03   | 13       | Long-chain-fa  | ACSL4                   |
| -0.18     | -0.01         | 0.14      | 0.30          | -0.51     | -0.13   | 0.25      | 0.59    | -0.04     | -0.16   | -0.48     | -0.22   | 8        | Acetyl-coenzy  | ACSS2                   |
| -0.06     | -0.33         | 0.04      | -0.08         | -0.06     | 0.07    | -0.39     | -0.27   | 0.03      | 0.18    | -0.27     | -0.21   | 22       | Actin, alpha s | ACTA1;ACTC1;ACTG2;ACTA2 |
| -0.07     | -0.28         | 0.07      | -0.15         | 0.02      | 0.08    | -0.55     | 0.50    | -0.13     | 0.23    | -0.58     | -0.56   | 9        | Beta-actin-lik | ACTBL2                  |
| -0.07     | -0.23         | 0.10      | 0.00          | -0.05     | 0.03    | -0.36     | -0.22   | 0.05      | 0.24    | -0.16     | -0.12   | 36       | Actin, cytopla | ACTG1                   |
| -0.10     | -1.12         | -0.26     | -0.81         | -0.29     | -0.35   | -0.40     | -0.28   | 0.26      | -0.08   | -0.32     | -0.28   | 64       | Alpha-actinin- | ACTN1                   |
| 0.06      | -0.80         | -0.51     | -0.87         | -0.59     | -0.60   | -0.49     | 0.16    | 0.59      | 0.01    | -0.44     | -0.17   | 65       | Alpha-actinin- | ACTN4                   |
| -0.10     | 0.02          | 0.21      | 0.08          | 0.09      | 0.29    | -0.11     | 0.11    | 0.03      | 0.33    | -0.04     | 0.07    | 10       | Alpha-centrac  | ACTR1A;ACTR1B           |
| -0.05     | -0.12         | -0.01     | -0.08         | -0.13     | -0.08   | -0.40     | -0.30   | -0.05     | 0.07    | 0.02      | 0.10    | 15       | Actin-related  | ACTR2                   |
| -0.12     | -0.13         | -0.16     | -0.03         | -0.02     | 0.03    | -0.46     | -0.26   | -0.07     | 0.02    | -0.03     | 0.05    | 19       | Actin-related  | ACTR3                   |
| 0.21      | -0.16         | 0.35      | -0.64         | 0.43      | -0.18   | -0.94     | -0.83   | -0.24     | -0.54   | -0.28     | -0.62   | 16       | Double-stranc  | ADAR                    |
| -0.09     | -0.19         | -0.02     | -0.10         | 0.25      | 0.13    | -0.10     | 0.02    | -0.47     | -0.43   | -0.07     | -0.16   | 12       | Alcohol dehyc  | ADH5                    |
| -0.03     | 0.09          | -0.37     | -0.30         | 0.30      | 0.24    | 0.51      | 0.19    | 0.06      | -0.35   | 0.64      | 0.49    | 3        | 1,2-dihydroxy  | ADI1                    |
| 0.00      | 0.06          | 0.15      | 0.14          | 0.07      | -0.07   | 0.34      | 0.57    | 0.12      | 0.24    | -0.10     | -0.04   | 12       | Adenosine kin  | ADK                     |
| 0.25      | 0.08          | 0.16      | 0.05          | 0.02      | 0.07    | 0.30      | 0.19    | -0.06     | -0.08   | -0.16     | -0.11   | 4        | Proteasomal    | ADRM1                   |
| 0.13      | 0.22          | -0.09     | -0.04         | 0.08      | -0.01   | -0.17     | -0.14   | -0.17     | -0.45   | 0.01      | -0.19   | 4        | Adenylosuccir  | ADSS                    |
| 0.17      | -0.28         | 1.00      | 0.05          | -0.02     | -0.01   | -0.57     | -0.49   | -0.42     | -0.46   | -0.48     | -0.52   | 22       | Agrin;Agrin N- | AGRN                    |
| 0.56      | 0.59          | -0.04     | -0.08         | -0.02     | -0.09   | 0.34      | 0.15    | -0.06     | -0.22   | 0.05      | -0.09   | 24       | Adenosylhom    | AHCY                    |
| -0.39     | -0.34         | -0.35     | -0.21         | -0.06     | -0.12   | 0.47      | 0.44    | -0.14     | -0.55   | 0.44      | 0.33    | 303      | Neuroblast di  | AHNAK                   |
| 0.47      | 0.76          | -0.42     | 0.18          | -1.02     | -1.09   | 0.87      | 1.14    | 0.13      | -0.01   | 0.52      | 0.83    | 113      | Protein AHNA   | AHNAK2                  |
| 0.23      | 0.25          | 0.08      | -0.10         | 0.07      | 0.00    | 0.28      | 0.46    | 0.11      | -0.05   | 0.18      | 0.21    | 25       | Absent in mel  | AIM1                    |
| 0.04      | 0.19          | 0.10      | 0.06          | -0.16     | -0.09   | 0.11      | 0.13    | -0.07     | 0.16    | 0.03      | 0.31    | 11       | Aminoacyl tR   | AIMP1                   |
| 0.03      | 0.60          | -0.25     | 0.44          | 0.09      | 0.15    | 0.62      | 0.93    | 0.27      | 0.20    | 0.05      | 0.29    | 10       | Adenylate kin  | AK1                     |
| 0.11      | 0.30          | 0.24      | 0.23          | -0.26     | -0.44   | -0.13     | -0.09   | -0.16     | -0.14   | 0.02      | -0.12   | 11       | Adenylate kin  | AK2                     |
| -0.15     | 0.21          | -0.07     | 0.07          | -0.14     | -0.14   | 0.24      | 0.28    | -0.45     | -0.31   | -0.32     | -0.06   | 7        | GTP:AMP pho    | AK4                     |
| -0.33     | -0.19         | 0.18      | 0.17          | -0.10     | -0.01   | -0.25     | 0.07    | -0.04     | 0.71    | -0.47     | -0.17   | 10       | Alcohol dehyc  | AKR1A1                  |
| 0.00      | 0.43          | -0.65     | 0.20          | -0.29     | 0.16    | -0.10     | 0.30    | 0.26      | 0.36    | -0.15     | 0.42    | 8        | Aldose reduct  | AKR1B1                  |

|       |       |       |       |       |       |       |       |       |       |       |       |                                   |
|-------|-------|-------|-------|-------|-------|-------|-------|-------|-------|-------|-------|-----------------------------------|
| 0.48  | -0.73 | 0.28  | 0.04  | -1.00 | -0.23 | -1.73 | -2.27 | 0.77  | 1.10  | -2.24 | -2.35 | 27 Aldehyde deh ALDH1A3           |
| 0.40  | 0.12  | 0.06  | 0.01  | 0.38  | 0.38  | 0.38  | 0.38  | -0.46 | -0.35 | -0.14 | -0.43 | 15 Alpha-aminoa ALDH7A1           |
| -0.06 | 0.14  | -0.07 | -0.11 | 0.34  | 0.27  | -0.05 | 0.12  | -0.22 | 0.08  | 0.51  | 0.49  | 14 4-trimethylarr ALDH9A1         |
| 0.11  | 0.13  | 0.02  | 0.09  | -0.06 | -0.20 | 0.02  | -0.02 | 0.11  | 0.02  | 0.16  | 0.11  | 35 Fructose-bispl ALDOA           |
| 0.15  | 0.20  | 0.02  | 0.04  | 0.00  | -0.23 | 0.31  | 0.37  | 0.29  | -0.09 | 0.32  | 0.22  | 16 Fructose-bispl ALDOC           |
| 0.19  | -0.08 | 0.14  | 0.03  | 0.16  | 0.07  | -0.05 | -0.09 | -0.05 | -0.28 | -0.13 | -0.12 | 9 Ankyrin repea ANKFY1            |
| 0.02  | 0.12  | -0.04 | 0.03  | 0.04  | 0.12  | 0.09  | 0.13  | -0.37 | -0.23 | -0.40 | -0.12 | 8 Acidic leucine ANP32A           |
| 0.23  | -1.51 | -0.22 | -0.71 | 1.83  | 2.13  | -0.76 | -0.70 | -0.75 | -0.12 | -1.96 | -1.55 | 20 Aminopeptida ANPEP             |
| -0.28 | 0.26  | 0.22  | 0.72  | -0.10 | 0.07  | -0.53 | -0.62 | 0.40  | 0.41  | -0.21 | 0.03  | 29 Annexin A1 ANXA1               |
| 0.52  | -0.10 | 0.13  | 0.33  | -0.04 | 0.17  | 0.26  | 0.14  | 1.48  | 0.69  | -0.12 | 0.40  | 29 Annexin A2;A1 ANXA2;ANXA2P2    |
| -0.15 | -0.20 | 0.09  | 0.44  | -0.12 | 0.03  | -0.63 | -0.66 | -0.35 | -0.19 | -0.04 | 0.15  | 22 Annexin A3;A1 ANXA3            |
| 0.27  | -0.05 | -0.03 | -0.21 | 0.17  | 0.10  | 0.17  | 0.13  | -0.36 | -0.45 | 0.10  | -0.01 | 26 Annexin A5;A1 ANXA5            |
| 0.26  | 0.38  | 0.35  | 0.09  | 0.17  | 0.34  | -0.29 | -0.32 | 0.18  | 0.36  | 0.48  | 0.17  | 14 Annexin A7 ANXA7               |
| -0.32 | -0.40 | -0.22 | -0.22 | -0.13 | -0.24 | 0.36  | 0.66  | -0.22 | -0.25 | 0.11  | 0.46  | 21 Annexin A8-li ANXA8L2          |
| -0.05 | 0.17  | 0.02  | 0.07  | 0.56  | 0.17  | -0.47 | -0.42 | 0.15  | 0.07  | -0.13 | 0.10  | 28 AP-1 complex AP1B1             |
| 0.06  | 0.09  | 0.22  | 0.14  | 0.14  | 0.19  | -0.17 | -0.03 | -0.12 | -0.23 | 0.02  | -0.01 | 21 AP-2 complex AP2A1             |
| 0.03  | 0.05  | 0.10  | -0.24 | 0.29  | 0.29  | 0.22  | 0.25  | -0.25 | -0.15 | 0.07  | 0.13  | 19 AP-2 complex AP2A2             |
| 0.03  | -0.07 | 0.14  | -0.11 | 0.07  | 0.13  | -0.16 | -0.09 | -0.14 | -0.15 | -0.09 | -0.06 | 35 AP-2 complex AP2B1             |
| -0.01 | -0.07 | -0.09 | -1.65 | 0.08  | 0.17  | -0.24 | -0.16 | 0.03  | -2.15 | -0.08 | -0.17 | 24 AP-3 complex AP3B1             |
| -0.66 | -0.03 | -0.06 | -0.19 | 0.03  | 0.22  | -0.39 | -0.39 | -0.02 | -0.05 | -0.31 | -0.22 | 16 AP-3 complex AP3D1             |
| -0.14 | -0.38 | -0.17 | -0.19 | 0.20  | 0.39  | -0.21 | -0.09 | -0.15 | -0.10 | -0.22 | -0.05 | 6 AP-3 complex AP3S1              |
| 0.02  | 0.17  | -0.01 | -0.04 | 0.03  | 0.04  | -0.13 | 0.20  | -0.26 | -0.04 | 0.14  | 0.31  | 12 Acylamino-aci APEH             |
| -0.12 | -0.24 | -0.18 | -0.43 | -0.15 | -0.06 | 0.06  | -0.11 | -0.43 | -0.21 | -0.05 | -0.17 | 15 DNA-(apurinic APEX1            |
| 0.02  | -0.10 | 0.16  | -0.06 | 0.28  | 0.14  | -0.17 | -0.28 | -0.15 | -0.15 | -0.15 | -0.18 | 8 Apoptosis inhi API5             |
| 0.16  | 0.33  | -0.25 | -0.25 | -0.04 | -0.12 | 1.53  | 1.65  | -0.36 | -0.34 | -0.25 | -0.21 | 9 Adipocyte pla: APMAP            |
| -0.08 | 0.15  | 0.04  | 0.16  | -0.19 | 0.10  | 0.17  | 0.17  | -0.07 | -0.05 | 0.13  | 0.20  | 1 DNA dC->dU-ε APOBEC3G           |
| -0.03 | 0.86  | -0.29 | 0.37  | -0.19 | -0.27 | 0.28  | 0.38  | 0.05  | -0.01 | 0.00  | 0.33  | 10 Adenine phos APRT              |
| 0.10  | -0.13 | -0.19 | 0.07  | 0.09  | 0.14  | -0.35 | -0.12 | 0.02  | 0.09  | -0.34 | -0.05 | 17 Coatomer sub ARCN1             |
| 0.12  | -0.42 | -0.06 | 0.14  | -0.01 | 0.09  | -0.36 | -0.42 | -0.19 | -0.23 | -0.16 | -0.25 | 9 ADP-ribosylati ARF4             |
| 0.13  | 0.30  | 0.17  | 0.99  | 0.08  | 0.04  | -0.11 | -0.03 | 0.23  | 0.13  | -0.05 | 0.05  | 6 Arfaptin-1 ARFIP1               |
| 0.15  | -0.02 | -0.35 | 0.07  | 0.01  | 0.06  | -0.51 | -0.37 | -0.14 | -0.17 | -0.08 | 0.03  | 10 Rho GTPase-a ARHGAP1           |
| -0.08 | -0.22 | 0.21  | 0.07  | 0.13  | 0.15  | -0.17 | -0.16 | 0.02  | 0.09  | 0.07  | 0.13  | 11 Rho GDP-dissr ARHGDIA          |
| -0.07 | -0.39 | -0.39 | -0.45 | -1.47 | -0.97 | -1.44 | -1.61 | 0.35  | 0.67  | -0.88 | -0.83 | 7 Rho GDP-dissr ARHGDIB           |
| -0.07 | -0.35 | 0.05  | -0.20 | 0.04  | 0.10  | -0.62 | -0.62 | -0.10 | 0.01  | 0.05  | 0.08  | 17 Actin-related  ARPC1B          |
| -0.09 | -0.12 | -0.08 | -0.09 | -0.13 | -0.01 | -0.38 | -0.30 | -0.08 | -0.07 | 0.00  | 0.11  | 18 Actin-related  ARPC2           |
| -0.08 | -0.24 | -0.11 | -0.01 | -0.09 | 0.02  | -0.33 | -0.20 | 0.01  | 0.14  | -0.03 | 0.04  | 6 Actin-related  ARPC3            |
| 0.10  | -0.03 | 0.00  | 0.02  | -0.06 | -0.03 | -0.20 | -0.15 | -0.04 | 0.07  | -0.02 | 0.06  | 9 Actin-related  ARPC4;ARPC4-TLL3 |
| -0.31 | -0.66 | -0.68 | -0.13 | -0.01 | 0.06  | -0.43 | -0.25 | -0.29 | -0.02 | 0.26  | 0.34  | 7 Actin-related  ARPC5            |
| 0.06  | 0.20  | 0.03  | -0.20 | 0.16  | 0.22  | -0.15 | -0.24 | -0.01 | -0.04 | 0.04  | 0.16  | 25 Activating sigr ASCC3          |
| 0.06  | -0.06 | 0.09  | 0.07  | 0.14  | 0.05  | -0.21 | -0.46 | -0.10 | -0.11 | 0.17  | 0.00  | 29 Bifunctional p ATIC            |
| -0.03 | 0.05  | -0.12 | -0.03 | 0.15  | 0.13  | 0.74  | 0.67  | 0.49  | 0.54  | 0.04  | 0.18  | 7 Atlastin-3 ATL3                 |
| -0.14 | 0.06  | -0.23 | 0.00  | -0.08 | -0.25 | 0.87  | 0.92  | 0.00  | -0.06 | 0.15  | 0.21  | 42 Sodium/potas ATP1A1            |
| -0.25 | 0.02  | -0.28 | -0.13 | -0.31 | -0.27 | 0.69  | 0.81  | -0.01 | -0.12 | 0.17  | 0.35  | 5 Sodium/potas ATP1B3             |
| -0.05 | -0.03 | -0.11 | -0.08 | -0.21 | -0.14 | -0.22 | 0.02  | 0.08  | 0.13  | -0.15 | -0.04 | 38 Sarcoplasmic/ ATP2A2           |
| 0.36  | 0.04  | -0.27 | -0.23 | 0.06  | -0.10 | 0.85  | 0.55  | 0.06  | -0.31 | -0.51 | -0.47 | 14 Plasma memb ATP2B1;ATP2B3      |
| 0.12  | 0.40  | -0.31 | 0.27  | -0.14 | -0.19 | 0.75  | 0.89  | 0.14  | 0.10  | 0.22  | 0.40  | 16 Plasma memb ATP2B4             |
| 0.04  | 0.34  | -0.13 | 0.20  | -0.01 | -0.08 | 0.25  | 0.32  | 0.03  | 0.11  | 0.11  | 0.29  | 33 ATP synthase ATP5A1            |
| -0.02 | 0.25  | -0.01 | 0.18  | -0.05 | -0.09 | 0.18  | 0.31  | 0.02  | 0.09  | 0.10  | 0.20  | 22 ATP synthase ATP5B             |
| 0.22  | 0.69  | -0.13 | 0.20  | 0.09  | 0.05  | 0.17  | 0.32  | 0.00  | 0.07  | 0.18  | 0.31  | 13 ATP synthase ATP5C1            |
| 0.03  | 0.24  | 0.01  | 0.19  | -0.02 | -0.04 | 0.18  | 0.30  | 0.13  | 0.20  | 0.25  | 0.21  | 13 ATP synthase ATP5F1            |

|       |       |       |       |       |       |       |       |       |       |       |       |                                   |
|-------|-------|-------|-------|-------|-------|-------|-------|-------|-------|-------|-------|-----------------------------------|
| 0.09  | 0.54  | 0.11  | 0.21  | -0.02 | -0.08 | 0.27  | 0.44  | -0.14 | 0.14  | 0.11  | 0.28  | 10 ATP synthase ATP5H             |
| -0.06 | 0.24  | 0.09  | 0.27  | 0.00  | 0.05  | 0.22  | 0.36  | -0.02 | 0.11  | 0.14  | 0.19  | 11 ATP synthase ATP5O             |
| 0.06  | 0.43  | -0.36 | 0.12  | -0.19 | 0.13  | -0.08 | -0.10 | 0.08  | -0.05 | -0.55 | -0.52 | 12 V-type proton ATP6V1A          |
| 0.14  | -0.02 | 0.04  | -0.40 | -0.16 | 0.11  | -0.26 | -0.37 | -0.18 | -0.46 | -0.41 | -0.70 | 6 Ataxin-2-like $\gamma$ ATXN2L   |
| 0.14  | 0.43  | 0.82  | 0.50  | -0.18 | -0.16 | -0.26 | -0.14 | 0.22  | 0.07  | 0.27  | 0.44  | 11 BAG family m $\alpha$ BAG3     |
| -0.01 | 0.15  | 0.29  | 0.16  | -0.21 | -0.02 | 0.82  | 0.40  | -0.11 | -0.15 | -0.14 | -0.06 | 14 Large proline- BAG6            |
| -0.18 | -0.31 | 0.24  | 0.09  | -0.24 | -0.13 | -0.08 | 0.10  | -0.23 | 0.01  | -0.45 | -0.45 | 14 Brain acid solt BASP1          |
| 0.01  | 0.00  | -0.25 | -0.15 | -0.02 | 0.14  | 0.10  | 0.03  | -0.16 | 0.08  | -0.33 | -0.22 | 6 Apoptosis reg BAX               |
| 0.07  | 0.04  | -0.08 | -0.01 | 0.00  | 0.00  | 0.13  | 0.28  | -0.02 | 0.23  | 0.14  | 0.11  | 19 B-cell recepto BCAP31          |
| 0.34  | -0.06 | -0.11 | -0.94 | 0.32  | 0.26  | -0.77 | -0.43 | 0.16  | -0.33 | -0.05 | -0.65 | 5 Bcl-2-associat BCLAF1           |
| 0.43  | 0.38  | 0.18  | -0.10 | 0.22  | 0.37  | 0.21  | 0.44  | 0.14  | 0.16  | 0.07  | -0.06 | 13 Biliverdin red $\alpha$ BLVRA  |
| -0.71 | -0.21 | 0.17  | 0.55  | -0.37 | -0.25 | -0.08 | 0.47  | 0.62  | 0.24  | 0.00  | 0.54  | 6 Flavin reducta BLVRB            |
| 0.04  | -0.12 | 0.34  | 0.04  | 0.21  | -0.12 | 0.30  | 0.52  | -0.31 | -0.37 | 0.11  | 0.09  | 5 Basigin BSG                     |
| 0.20  | -0.17 | 0.40  | -0.31 | -0.01 | -0.15 | 0.21  | -0.06 | 0.00  | -0.28 | 0.20  | 0.00  | 5 BTF3                            |
| -0.05 | -0.18 | 0.40  | -0.16 | 0.06  | -0.12 | 0.19  | -0.09 | -0.03 | -0.24 | 0.01  | -0.05 | 10 Transcription BTF3             |
| -0.08 | -0.26 | 0.32  | -0.13 | 0.09  | -0.05 | 0.00  | -0.05 | -0.15 | -0.41 | -0.14 | -0.30 | 9 Mitotic check $\beta$ BUB3      |
| 0.09  | 0.41  | 0.29  | 0.27  | -0.07 | -0.03 | -0.07 | -0.17 | -0.02 | 0.01  | 0.05  | 0.12  | 15 Basic leucine $\gamma$ BZW1    |
| 0.04  | 0.17  | -0.10 | 0.01  | 0.08  | 0.16  | -0.37 | -0.23 | 0.37  | 0.22  | -0.01 | 0.12  | 10 tRNA-splicing C22orf28         |
| -0.49 | 1.65  | -1.44 | 0.51  | -0.95 | -0.50 | 1.47  | 1.97  | 1.06  | 1.21  | -0.28 | 1.18  | 11 Carbonic anhyCA2               |
| 0.14  | 0.04  | -0.03 | -0.10 | 0.22  | 0.31  | -0.03 | -0.11 | -0.36 | -0.16 | 0.10  | 0.14  | 14 Calcyclin-bind CACYBP          |
| -0.05 | 0.13  | -0.16 | -0.13 | -0.04 | -0.23 | 0.10  | -0.12 | -0.15 | -0.36 | 0.16  | 0.01  | 72 CAD protein; $\beta$ CAD       |
| -0.06 | -0.56 | 0.15  | -0.12 | 0.32  | 0.20  | -0.44 | -0.43 | -0.07 | -0.08 | -0.15 | -0.33 | 35 Caldesmon CALD1                |
| -0.37 | -0.60 | -0.19 | -0.31 | -0.38 | -0.38 | -0.51 | -0.40 | -0.05 | 0.20  | -0.39 | -0.22 | 22 Calreticulin CALR              |
| 0.18  | -0.34 | 0.63  | -0.38 | 0.19  | 0.18  | -0.08 | -0.12 | -0.04 | 0.11  | 0.07  | -0.04 | 11 Calumenin CALU                 |
| 0.03  | 0.23  | -0.16 | -0.20 | 0.08  | 0.05  | 0.11  | 0.17  | 0.01  | 0.01  | 0.07  | 0.10  | 53 Cullin-associat CAND1          |
| -0.11 | -0.13 | -0.30 | -0.33 | -0.32 | -0.34 | 0.12  | 0.19  | -0.12 | 0.10  | -0.34 | -0.12 | 31 Calnexin CANX                  |
| -0.10 | -0.16 | -0.16 | 0.20  | -0.13 | 0.06  | -0.64 | -0.42 | 0.13  | 0.35  | -0.12 | 0.12  | 37 Adenylyl cyclaCAP1             |
| -0.02 | 0.32  | 0.10  | 0.73  | 0.17  | 0.00  | 0.08  | 0.33  | -0.04 | -0.02 | -0.19 | -0.04 | 10 Macrophage- $\alpha$ CAPG      |
| 0.11  | 0.24  | -0.31 | -0.06 | -0.03 | 0.08  | -0.02 | 0.29  | 0.07  | 0.17  | -0.11 | 0.18  | 19 Calpain-1 cataCAPN1            |
| 0.03  | -0.25 | 0.38  | 0.11  | -0.06 | 0.04  | -0.38 | -0.54 | 0.03  | 0.19  | -0.45 | -0.53 | 18 Calpain-2 cataCAPN2            |
| 0.05  | -0.17 | 0.16  | 0.03  | 0.01  | 0.09  | -0.29 | -0.18 | -0.01 | 0.16  | -0.26 | -0.20 | 9 Calpain small CAPNS1            |
| 0.09  | -0.13 | 0.37  | -0.74 | 0.33  | 0.17  | -0.05 | -0.19 | -0.05 | -0.83 | 0.27  | -0.17 | 14 Caprin-1 CAPRIN1               |
| -0.06 | -0.04 | -0.01 | 0.01  | 0.00  | 0.03  | -0.17 | -0.07 | -0.33 | -0.14 | -0.10 | -0.05 | 18 F-actin-cappinCAPZA1           |
| 0.07  | 0.15  | 0.10  | 0.08  | -0.03 | 0.06  | 0.00  | 0.09  | -0.17 | -0.08 | -0.04 | 0.02  | 22 CAPZB                          |
| 0.01  | -0.14 | 0.03  | 0.05  | -0.38 | 0.00  | -0.81 | -0.41 | -0.15 | 0.33  | -0.34 | 0.04  | 15 Cysteine--trn CARS             |
| 0.05  | 0.46  | 0.44  | 0.56  | -0.01 | -0.15 | -0.06 | 0.26  | 0.14  | 0.25  | -0.01 | 0.03  | 10 Calpastatin CAST               |
| -0.12 | -1.27 | 0.12  | -0.78 | 0.04  | -0.23 | 0.15  | -0.22 | -0.08 | 0.73  | -0.62 | -1.05 | 6 Caveolin-1; $\alpha$ CAV1       |
| 0.47  | 0.68  | -0.62 | -0.40 | -0.13 | -0.14 | 0.53  | 0.76  | 0.23  | 0.09  | 0.44  | 0.36  | 17 Carbonyl redu CBR1             |
| 0.03  | -0.50 | -0.04 | -0.29 | 0.17  | -0.30 | 0.16  | -0.05 | 0.07  | 0.01  | -0.13 | -0.18 | 5 Chromobox p $\alpha$ CBX3       |
| 0.31  | 0.12  | -0.53 | -0.42 | 0.09  | 0.07  | 0.11  | 0.18  | -0.10 | -0.14 | 0.49  | 0.48  | 11 Coiled-coil do $\alpha$ CCDC47 |
| 0.10  | 0.17  | 0.03  | 0.09  | 0.04  | 0.02  | 0.13  | 0.06  | -0.05 | -0.09 | 0.07  | 0.13  | 36 T-complex prc CCT2             |
| 0.01  | 0.11  | 0.04  | 0.14  | 0.01  | -0.01 | 0.17  | -0.05 | -0.08 | -0.04 | -0.02 | 0.02  | 36 T-complex prc CCT3             |
| 0.10  | 0.14  | 0.00  | 0.17  | -0.01 | -0.05 | 0.06  | 0.00  | -0.04 | -0.07 | 0.00  | 0.02  | 28 T-complex prc CCT4             |
| 0.09  | 0.24  | -0.10 | 0.07  | 0.03  | 0.06  | 0.15  | 0.11  | -0.06 | -0.10 | 0.01  | 0.05  | 38 T-complex prc CCT5             |
| 0.00  | 0.07  | 0.03  | 0.15  | -0.03 | 0.03  | 0.12  | 0.02  | -0.04 | 0.00  | 0.03  | 0.09  | 31 T-complex prc CCT6A            |
| 0.02  | 0.20  | -0.11 | 0.19  | 0.08  | 0.03  | 0.14  | 0.03  | -0.07 | 0.00  | 0.12  | 0.13  | 32 T-complex prc CCT7             |
| 0.11  | 0.14  | -0.18 | 0.08  | -0.05 | 0.01  | 0.16  | 0.01  | -0.08 | -0.14 | 0.04  | 0.01  | 35 T-complex prc CCT8             |
| 0.58  | 0.47  | 0.41  | 0.26  | -0.33 | -0.21 | 0.08  | 0.28  | -0.22 | -0.34 | 0.09  | -0.08 | 8 CD44 antigen CD44               |
| -0.23 | -0.62 | 0.39  | 0.32  | 0.04  | 0.22  | -0.31 | -0.05 | 0.18  | 1.58  | -0.20 | 0.44  | 5 CD59 glycoprc CD59              |
| 0.02  | 0.19  | 1.01  | 0.88  | -0.40 | -0.35 | 0.94  | 1.30  | 0.04  | 0.01  | 0.54  | 0.73  | 4 CD9 antigen CD9                 |

|       |       |       |       |       |       |       |       |       |       |       |       |                                     |
|-------|-------|-------|-------|-------|-------|-------|-------|-------|-------|-------|-------|-------------------------------------|
| -0.19 | -0.04 | 0.33  | 0.09  | -0.04 | 0.01  | -0.58 | -0.51 | -0.14 | -0.07 | -0.02 | -0.03 | 18 Hsp90 co-chaperone CDC37         |
| -0.09 | -0.19 | 0.54  | 0.12  | -0.02 | -0.08 | 0.04  | 0.06  | 0.05  | -0.04 | -0.13 | -0.14 | 7 Cell division cycle CDC42         |
| -0.16 | -0.13 | -0.10 | -0.17 | -0.21 | 0.13  | -0.01 | -0.07 | -0.16 | 0.01  | -0.02 | 0.04  | 4 CUGBP Elav-like CELF1             |
| -0.03 | -0.19 | 0.05  | 0.11  | -0.09 | 0.00  | -0.03 | 0.04  | -0.05 | 0.07  | -0.20 | -0.07 | 23 Cofilin-1 CFL1                   |
| -0.47 | -0.41 | -0.04 | -0.19 | 0.20  | 0.26  | -0.17 | -0.04 | 0.17  | 0.53  | 0.01  | -0.09 | 11 Coiled-coil helix CHCHD3         |
| 0.25  | 0.50  | 0.11  | -0.27 | 0.27  | 0.31  | 0.33  | 0.11  | -0.09 | -0.29 | 0.09  | -0.05 | 39 Chromodomain CHD4                |
| 0.23  | -0.17 | -0.32 | -1.16 | -0.17 | -0.10 | -0.50 | -0.64 | -0.08 | -0.40 | -0.14 | -0.64 | 7 Calcium homeostasis CHERP         |
| -0.11 | -0.20 | 0.26  | 0.12  | 0.14  | -0.13 | -0.12 | -0.23 | -0.25 | -0.10 | -0.24 | -0.04 | 9 Cysteine and histidine CHORDC1    |
| 0.17  | -0.17 | 0.09  | -0.36 | 0.20  | 0.06  | -0.15 | -0.11 | 0.05  | 0.02  | 0.09  | -0.09 | 30 Cytoskeleton-associated CKAP4    |
| 0.06  | 0.12  | 0.27  | 0.15  | -0.09 | -0.04 | 0.12  | 0.12  | 0.07  | -0.21 | 0.12  | 0.07  | 22 Cytoskeleton-associated CKAP5    |
| -0.35 | 0.36  | -0.36 | 0.32  | -0.69 | -0.75 | -0.30 | 0.09  | -0.14 | 0.04  | 0.66  | 0.86  | 13 Creatine kinase CKMT1A;CKMT1B    |
| 0.11  | -0.07 | 0.25  | 0.10  | 0.09  | 0.16  | -0.38 | -0.24 | -0.20 | -0.06 | -0.37 | -0.28 | 15 Chloride intracellular CLIC1     |
| -0.25 | -0.24 | -0.08 | 0.04  | 0.02  | 0.10  | 0.02  | 0.09  | 0.05  | 0.31  | -0.07 | 0.23  | 9 Chloride intracellular CLIC4      |
| 0.11  | -0.04 | 0.24  | -0.11 | 0.18  | 0.09  | -0.25 | -0.22 | 0.21  | 1.01  | 0.11  | -0.14 | 5 Clathrin interactor CLINT1        |
| 0.10  | 0.09  | -0.12 | -0.11 | 0.02  | 0.09  | -0.10 | 0.00  | 0.07  | 0.09  | -0.15 | -0.11 | 85 Clathrin heavy chain CLTC        |
| -0.04 | 0.13  | -0.02 | -0.11 | -0.01 | -0.33 | 0.36  | 0.10  | -0.09 | -0.47 | 0.50  | 0.35  | 29 Clustered mitogen-activated CLUH |
| -0.11 | -0.07 | -0.23 | 0.21  | 0.08  | 0.17  | -0.01 | 0.11  | 0.19  | 0.14  | 0.09  | 0.34  | 9 UMP-CMP kinase CMPK1              |
| -0.32 | -0.29 | -0.09 | -0.24 | 0.11  | 0.09  | 0.17  | 0.11  | -0.46 | -0.47 | -0.22 | -0.03 | 13 Cytosolic non-specific CNDP2     |
| 0.07  | -0.36 | 0.11  | -0.22 | 0.06  | -0.01 | -0.77 | -0.78 | -0.12 | 0.14  | -0.32 | -0.30 | 11 Calponin-2 CNN2                  |
| 0.38  | -0.13 | 0.65  | -0.08 | 0.07  | 0.39  | -0.75 | -0.71 | -0.03 | 0.18  | -0.52 | -0.46 | 7 Calponin-3 CNN3                   |
| -0.07 | 0.16  | 0.00  | -0.20 | 0.17  | 0.16  | 0.04  | -0.08 | -0.02 | -0.30 | -0.05 | 0.03  | 24 CCR4-NOT transcription CNOT1     |
| 0.00  | -2.10 | 1.52  | -0.99 | -0.29 | -2.12 | -0.26 | -1.56 | 0.74  | -0.31 | -0.23 | -1.94 | 46 Collagen alpha1(C) COL12A1       |
| -1.55 | -1.27 | 0.20  | -0.46 | -0.93 | -0.13 | -0.18 | 0.55  | -1.83 | -0.82 | -0.84 | 0.21  | 11 Collagen alpha1(C) COL17A1       |
| -0.01 | -0.28 | 0.26  | -0.52 | -0.18 | -0.95 | 0.10  | -0.28 | 0.61  | 0.23  | 0.04  | -0.72 | 35 Collagen alpha1(C) COL7A1        |
| -0.92 | -0.56 | -0.46 | -0.31 | 0.16  | 0.73  | -0.25 | 0.15  | 0.01  | -0.05 | -0.60 | 0.12  | 9 Procollagen gamma1(C) COLGALT1    |
| 0.07  | -0.04 | -0.14 | -0.06 | -0.01 | 0.10  | -0.46 | -0.29 | -0.04 | 0.05  | -0.18 | 0.00  | 63 Coatamer subunit COPA            |
| 0.04  | -0.05 | -0.12 | 0.03  | -0.03 | 0.25  | -0.26 | -0.17 | -0.07 | 0.00  | -0.10 | 0.03  | 32 Coatamer subunit COPB1           |
| 0.15  | -0.04 | 0.01  | -0.02 | 0.00  | 0.18  | -0.44 | -0.30 | -0.03 | -0.01 | -0.15 | -0.01 | 29 Coatamer subunit COPB2           |
| -0.01 | -0.22 | 0.02  | -0.12 | -0.08 | 0.14  | -0.61 | -0.43 | -0.15 | -0.01 | -0.25 | -0.12 | 32 Coatamer subunit COPG1           |
| 0.03  | 0.09  | -0.11 | -0.19 | 0.14  | -0.22 | 0.12  | -0.02 | -0.16 | -0.11 | 0.25  | 0.13  | 12 COP9 signalosome COPS2           |
| 0.08  | 0.06  | 0.00  | 0.11  | -0.18 | -0.07 | 0.06  | 0.01  | -0.09 | 0.00  | 0.16  | 0.22  | 13 COP9 signalosome COPS4           |
| -0.11 | 0.06  | 0.21  | 0.11  | 0.41  | 0.03  | 0.33  | 0.18  | -0.20 | -0.02 | -0.22 | 0.07  | 5 COP9 signalosome COPS8            |
| -0.01 | -0.15 | -0.15 | 0.03  | -0.09 | 0.00  | 0.00  | 0.09  | 0.17  | -0.20 | -0.11 | 0.04  | 11 Coronin-1B;Coronin CORO1B        |
| -0.05 | -0.07 | 0.21  | 0.35  | 0.11  | 0.15  | 0.27  | 0.36  | 0.07  | 0.31  | -0.46 | -0.23 | 17 Coronin-1C;Coronin CORO1C        |
| 0.35  | 0.23  | -0.27 | -0.03 | 0.50  | 0.59  | 0.54  | 0.88  | -0.23 | 0.09  | 0.16  | 0.26  | 2 Cysteine-rich domain CRIP2        |
| -0.03 | 0.28  | -0.31 | 0.07  | -0.03 | -0.07 | 0.41  | 0.46  | 0.08  | 0.19  | 0.16  | 0.21  | 12 Citrate synthase CS              |
| 0.32  | 0.27  | 0.37  | -0.43 | -0.07 | -0.23 | -0.18 | -0.34 | 0.10  | -0.42 | 0.20  | -0.02 | 25 Cold shock domain CSDE1          |
| 0.51  | 0.56  | -0.28 | -0.46 | 0.09  | 0.08  | 0.45  | 0.42  | -0.33 | -0.49 | -0.23 | -0.29 | 49 Exportin-2 CSE1L                 |
| 0.16  | -0.07 | 0.01  | -0.04 | 0.03  | 0.05  | 0.44  | 0.59  | -0.18 | 0.31  | -0.12 | -0.29 | 6 Casein kinase CSNK2A1;CSNK2A3     |
| 0.30  | 0.28  | 0.03  | -0.30 | 0.09  | 0.10  | 0.34  | 0.26  | -0.18 | -0.17 | -0.35 | -0.42 | 5 Casein kinase CSNK2B              |
| -0.36 | -0.20 | 0.14  | 0.29  | -0.35 | 0.16  | -0.17 | 0.09  | 0.15  | 0.48  | -0.28 | 0.17  | 10 Cysteine and histidine CSRP1     |
| -0.46 | -0.19 | -0.32 | 0.10  | -0.24 | 0.34  | -0.20 | 0.36  | -0.01 | 0.55  | 0.26  | 0.98  | 9 Cysteine and histidine CSRP2      |
| -0.17 | 0.06  | 0.54  | 0.42  | -0.02 | -0.13 | 0.28  | 0.28  | 0.05  | 0.03  | 0.12  | 0.11  | 33 Catenin alpha CTNNA1             |
| 0.12  | -0.18 | 1.09  | 0.53  | 0.21  | -0.17 | -0.16 | -0.13 | -0.03 | -0.20 | 0.09  | -0.10 | 22 Catenin beta-1 CTNNB1            |
| 0.12  | 0.41  | 0.21  | 0.10  | 0.04  | -0.08 | -0.07 | -0.05 | 0.22  | -0.02 | 0.15  | 0.05  | 23 Catenin delta-1 CTNND1           |
| 0.22  | 0.25  | -0.35 | -0.20 | -0.13 | -0.11 | -0.23 | -0.48 | -0.16 | -0.32 | 0.09  | -0.16 | 17 CTP synthase CTPS1               |
| 0.26  | -0.22 | -0.22 | -0.48 | 0.46  | 0.23  | -0.35 | -0.49 | 0.40  | 0.22  | 0.14  | -0.11 | 8 Cathepsin B;C CTSB                |
| -0.23 | 0.29  | -0.23 | 0.57  | 0.63  | 0.82  | -0.03 | 0.00  | 0.89  | 0.96  | 0.02  | 0.16  | 10 Dipeptidyl peptidase CTSC        |
| 0.04  | 0.68  | -0.46 | 0.26  | 0.49  | 0.27  | 0.77  | 0.95  | -0.05 | -0.07 | -0.14 | 0.07  | 15 Cathepsin D;C CTSD               |
| -0.09 | -0.02 | 0.12  | -0.07 | 0.07  | 0.04  | -0.29 | -0.29 | 0.02  | -0.23 | 0.13  | 0.04  | 25 Src substrate CTTN               |

|       |       |       |       |       |       |       |       |       |       |       |       |                                      |
|-------|-------|-------|-------|-------|-------|-------|-------|-------|-------|-------|-------|--------------------------------------|
| -0.19 | 0.00  | 0.00  | 0.25  | -0.31 | -0.07 | -0.41 | 0.05  | -0.12 | 0.22  | -0.36 | -0.01 | 5 Cytochrome b CYB5B                 |
| -0.84 | 0.49  | -0.65 | 0.69  | -1.27 | -1.07 | 0.41  | 0.95  | 0.14  | 0.21  | 0.32  | 1.08  | 13 NADH-cytochr CYB5R1               |
| 0.31  | 0.28  | 0.21  | 0.09  | 0.07  | 0.00  | 0.60  | 0.75  | -0.05 | 0.05  | 2.13  | 2.10  | 4 Cytochrome c CYC1                  |
| -0.09 | -0.40 | -0.01 | 0.22  | 0.08  | 0.06  | 0.31  | 0.53  | -0.20 | 0.12  | 0.19  | 0.50  | 9 Cytochrome c CYCS                  |
| -0.02 | 0.34  | -0.08 | 0.40  | -0.08 | 0.06  | 0.21  | 0.44  | 0.09  | 0.25  | -0.09 | 0.23  | 35 Cytoplasmic F CYFIP1              |
| 0.03  | 0.12  | 0.09  | 0.13  | -0.09 | -0.13 | 0.17  | 0.20  | 0.04  | 0.10  | 0.06  | 0.16  | 22 Aspartate--trI DARS               |
| -0.07 | -0.03 | 0.28  | -0.20 | 0.10  | 0.18  | 0.12  | 0.06  | 0.01  | 0.01  | -0.05 | 0.21  | 13 Drebrin-like p DBNL               |
| 0.31  | 0.38  | -0.27 | -0.11 | 0.14  | 0.31  | -0.26 | -0.30 | 0.12  | 0.11  | -0.06 | -0.03 | 5 Deoxycytidyla DCTD                 |
| -0.13 | 0.05  | -0.16 | 0.13  | 0.11  | 0.14  | 0.09  | 0.22  | 0.01  | 0.12  | -0.01 | 0.30  | 42 Dynactin subu DCTN1;DKFZp686E0752 |
| 0.08  | 0.14  | -0.01 | 0.17  | 0.12  | 0.27  | 0.06  | -0.01 | 0.17  | 0.26  | -0.01 | 0.19  | 12 Dynactin subu DCTN2               |
| -0.09 | 0.25  | -0.29 | 0.00  | 0.08  | 0.13  | 0.13  | 0.06  | 0.15  | 0.54  | -0.14 | 0.22  | 7 Dynactin subu DCTN3                |
| 0.14  | 0.16  | 0.12  | 0.01  | -0.12 | -0.17 | 0.18  | -0.08 | -0.06 | -0.18 | 0.16  | -0.08 | 6 dCTP pyropho DCTPP1                |
| 0.67  | 1.05  | -0.67 | -0.02 | 0.06  | 0.05  | 1.79  | 1.74  | 0.12  | -0.10 | -0.46 | -0.44 | 6 L-xylulose red DCXR                |
| 0.25  | 0.28  | 0.19  | -0.04 | 0.06  | 0.02  | 0.50  | 0.44  | -0.02 | -0.18 | 0.01  | -0.11 | 33 DNA damage- DDB1                  |
| 0.27  | 0.12  | -0.08 | -0.08 | 0.13  | 0.19  | 0.26  | 0.41  | -0.21 | -0.02 | -0.24 | -0.03 | 12 Dolichyl-diphc DDOST              |
| 0.05  | 0.02  | -0.08 | -0.04 | 0.00  | 0.00  | -0.22 | -0.18 | 0.10  | 0.00  | 0.10  | 0.19  | 21 ATP-dependeı DDX1                 |
| -0.11 | -0.54 | -0.09 | -0.27 | 0.23  | 0.26  | -0.45 | -0.45 | 0.27  | 0.08  | -0.09 | -0.24 | 15 Probable ATP- DDX17               |
| 0.08  | -0.25 | 0.05  | -0.84 | 0.45  | 0.30  | -0.27 | -0.44 | 0.29  | -0.11 | 0.04  | -0.71 | 19 Nucleolar RN/ DDX21               |
| 0.32  | 0.02  | -0.09 | -0.33 | 0.09  | 0.10  | 0.09  | 0.01  | 0.03  | -0.42 | -0.27 | -0.43 | 12 Spliceosome F DDX39B              |
| 0.21  | -0.25 | -0.51 | -1.05 | 0.27  | 0.17  | -0.47 | -0.66 | 0.38  | -0.04 | -0.07 | -0.15 | 26 ATP-dependeı DDX3X;DDX3Y          |
| 0.23  | 0.19  | -0.08 | -0.53 | 0.22  | -0.02 | 0.34  | 0.12  | 0.07  | -0.33 | 0.16  | -0.19 | 24 Probable ATP- DDX46               |
| 0.09  | -0.73 | 0.09  | -0.55 | 0.42  | 0.05  | -0.35 | -0.43 | -0.15 | -0.13 | -0.24 | -0.42 | 15 Probable ATP- DDX5                |
| 0.15  | 0.07  | 0.42  | -0.02 | -0.20 | -0.01 | 0.17  | 0.10  | 0.07  | -0.19 | 0.12  | -0.08 | 11 Probable ATP- DDX6                |
| -0.27 | -0.08 | 0.01  | -0.19 | 0.10  | -0.10 | 0.96  | 0.52  | -0.22 | -0.07 | 0.14  | 0.00  | 11 Protein DEK DEK                   |
| 0.43  | 0.31  | -0.02 | -0.05 | -0.19 | -0.23 | 0.24  | 0.06  | -0.14 | -0.22 | 0.04  | 0.11  | 7 7-dehydrocho DHCR7                 |
| 0.18  | 0.06  | -0.07 | -0.22 | 0.14  | 0.18  | 0.25  | 0.19  | -0.04 | -0.29 | 0.16  | 0.00  | 24 Putative pre-n DHX15              |
| -0.02 | -0.45 | -0.38 | -0.78 | 0.11  | 0.13  | -0.54 | -0.63 | 0.31  | -0.15 | -0.04 | -0.52 | 48 ATP-dependeı DHX9                 |
| -0.04 | -0.01 | -0.25 | -0.02 | -0.09 | -0.06 | 0.44  | 0.47  | -0.06 | 0.08  | -0.10 | 0.04  | 39 Protein diaph: DIAPH1             |
| -0.19 | -0.21 | 0.12  | -0.02 | 0.05  | -0.12 | 0.30  | 0.14  | 0.01  | 0.07  | 0.06  | -0.15 | 15 Exosome com DIS3                  |
| -0.19 | 0.00  | 0.28  | 0.32  | 0.08  | 0.21  | 0.22  | 0.45  | 0.00  | 0.17  | -0.18 | 0.26  | 13 Dihydrolipoyl DLD                 |
| -0.09 | 0.07  | 0.41  | 0.40  | -0.04 | -0.01 | 0.21  | 0.41  | -0.24 | -0.13 | -0.53 | -0.27 | 5 Dihydrolipoyll DLST                |
| 0.21  | -0.09 | 0.33  | 0.05  | 0.24  | -0.01 | -0.22 | -0.42 | -0.25 | -0.16 | -0.01 | -0.16 | 11 DnaJ homolog DNAJA1               |
| 0.24  | 0.22  | -0.02 | -0.02 | -0.02 | -0.04 | -0.40 | -0.20 | -0.19 | -0.26 | -0.13 | 0.03  | 8 DnaJ homolog DNAJA2                |
| 0.05  | 0.35  | 0.03  | 0.56  | -0.20 | -0.04 | 0.18  | 0.20  | 0.15  | 0.18  | -0.32 | -0.11 | 13 DnaJ homolog DNAJB1               |
| 0.19  | -0.09 | 0.08  | -0.19 | -0.01 | 0.00  | -0.13 | -0.01 | 0.10  | -0.07 | -0.05 | -0.22 | 17 DnaJ homolog DNAJC13              |
| 0.14  | 0.01  | 0.09  | 0.17  | 0.14  | 0.20  | -0.29 | -0.20 | -0.13 | -0.05 | 0.10  | -0.20 | 28 Dynamin-1-lik DNMT1L              |
| 0.14  | 0.19  | 0.80  | -0.05 | 0.13  | -0.05 | 0.11  | -0.16 | -0.21 | -0.40 | 0.26  | -0.11 | 18 DNA (cytosine DNMT1               |
| 0.53  | 0.68  | 0.29  | 0.66  | 0.01  | -0.33 | 0.52  | 0.66  | -0.62 | -1.07 | 0.01  | 0.01  | 8 2-deoxynucleı DNPH1                |
| -0.09 | -0.28 | 0.05  | -0.01 | -0.31 | 0.00  | 0.23  | 0.09  | -0.18 | 0.02  | 0.57  | 1.15  | 6 Deducator of c DOCK5               |
| 0.08  | -0.05 | -0.06 | 0.09  | -0.12 | -0.11 | 0.09  | 0.15  | -0.05 | -0.02 | -0.08 | 0.07  | 13 Dipeptidyl peı DPP3               |
| 0.06  | -0.43 | -0.47 | -0.69 | -0.19 | -0.04 | 1.05  | 1.04  | -0.45 | 0.01  | 0.08  | 0.22  | 16 Dihydropyrim DPYSL2               |
| -0.72 | -0.60 | 0.42  | 0.22  | 0.05  | 0.29  | -2.38 | -1.85 | -1.30 | -0.86 | -1.17 | -0.97 | 8 Dihydropyrim DPYSL3                |
| 0.21  | -0.04 | -0.03 | -0.10 | 0.05  | -0.20 | -0.31 | -0.55 | -0.26 | -0.15 | 0.12  | 0.20  | 12 Development: DRG1                 |
| 0.77  | 1.00  | 0.29  | -0.53 | -0.38 | -0.22 | -0.77 | -0.40 | -0.53 | -1.67 | 0.38  | -0.69 | 129 Desmoplakin DSP                  |
| 0.08  | 0.04  | 0.72  | -0.21 | 0.00  | 0.03  | 0.36  | 0.21  | 0.23  | -0.23 | 0.62  | 0.31  | 67 Dystonin DST                      |
| 0.12  | 0.19  | -0.32 | -0.17 | -0.25 | -0.25 | 1.02  | 1.14  | -0.15 | -0.17 | -0.22 | -0.11 | 16 Destrin DSTN                      |
| 0.05  | 0.04  | -0.23 | -0.10 | -0.02 | 0.03  | 0.58  | 0.41  | 0.00  | -0.06 | -0.01 | -0.09 | 13 Thymidylate k DTYMK               |
| 0.10  | 0.05  | 0.08  | 0.28  | -0.02 | 0.25  | -0.20 | -0.03 | 0.54  | 0.74  | -0.36 | 0.42  | 5 Dual specificit DUSP3              |
| 0.02  | -0.11 | 0.02  | -0.22 | 0.10  | 0.30  | 0.29  | 0.14  | -0.45 | -0.38 | 0.13  | 0.05  | 6 Deoxyuridine DUT                   |
| -0.01 | -0.03 | -0.14 | 0.13  | 0.03  | 0.09  | 0.08  | 0.25  | 0.01  | 0.10  | -0.21 | -0.03 | 297 Cytoplasmic d DYNC1H1            |

|       |       |       |       |       |       |       |       |       |       |       |       |                                       |
|-------|-------|-------|-------|-------|-------|-------|-------|-------|-------|-------|-------|---------------------------------------|
| 0.00  | 0.01  | 0.02  | -0.05 | 0.11  | 0.28  | 0.09  | 0.15  | 0.09  | 0.14  | -0.15 | -0.25 | 12 Cytoplasmic d DYNC1I2              |
| -0.07 | 0.06  | -0.04 | -0.01 | -0.30 | -0.21 | 0.55  | 0.66  | 0.11  | 0.45  | -0.36 | 0.23  | 3 3-beta-hydrox EBP                   |
| 0.00  | 0.54  | 0.11  | 0.57  | -0.50 | -0.35 | 0.39  | 0.60  | -0.26 | -0.16 | -0.06 | 0.37  | 15 Delta(3,5)-Del ECH1                |
| 0.02  | 0.08  | -0.01 | 0.11  | -0.01 | 0.00  | 0.27  | 0.25  | -0.09 | -0.12 | 0.19  | 0.27  | 10 Enoyl-CoA hyc ECHS1                |
| 0.02  | 0.36  | -0.25 | -0.60 | 0.07  | 0.19  | 0.30  | 0.51  | -0.09 | -0.41 | -0.30 | -0.23 | 31 Proteasome-a ECM29;KIAA0368        |
| 0.05  | 0.50  | -0.12 | 0.33  | -0.01 | 0.15  | 0.28  | 0.42  | 0.33  | 0.24  | 0.19  | 0.56  | 52 Early endoson EEA1                 |
| -0.10 | -0.08 | -0.15 | -0.05 | -0.09 | -0.19 | -0.09 | -0.08 | -0.05 | -0.08 | -0.03 | 0.01  | 27 Elongation fac EEF1A1;EEF1A1P5     |
| -0.08 | -0.09 | 0.04  | 0.13  | -0.10 | -0.03 | -0.05 | -0.07 | -0.06 | 0.03  | -0.03 | 0.00  | 11 Elongation fac EEF1D               |
| 0.05  | 0.19  | -0.06 | 0.05  | -0.19 | -0.21 | 0.01  | -0.18 | 0.03  | -0.13 | 0.06  | 0.04  | 24 Elongation fac EEF1G               |
| -0.08 | -0.02 | -0.10 | 0.00  | -0.04 | -0.12 | -0.21 | -0.28 | 0.09  | -0.09 | 0.12  | 0.19  | 68 Elongation fac EEF2                |
| -0.22 | -1.23 | 0.28  | -0.87 | -0.93 | -1.64 | -0.71 | -0.52 | -0.70 | -0.60 | -0.59 | -0.53 | 5 EGF-contains EFEMP1                 |
| 0.14  | -0.26 | 0.27  | -0.31 | 0.04  | 0.22  | -0.73 | -0.78 | -0.02 | 0.27  | -0.19 | -0.31 | 8 EF-hand dom EFHD2                   |
| 0.06  | -0.38 | 0.10  | -0.53 | 0.24  | -0.05 | 0.17  | -0.15 | 0.19  | -0.26 | -0.14 | -0.38 | 23 116 kDa U5 sr EFTUD2               |
| 0.40  | 0.23  | 0.20  | -0.01 | -0.07 | -0.18 | 0.72  | 0.54  | -0.10 | -0.21 | 0.08  | -0.11 | 42 Epidermal gro EGFR                 |
| 0.02  | -0.24 | 0.32  | -0.20 | 0.07  | 0.32  | -0.17 | -0.04 | -0.29 | 0.18  | -0.13 | -0.24 | 17 EH domain-co EHD1                  |
| 0.00  | -0.02 | -0.03 | -0.19 | -0.37 | -0.48 | 0.08  | 0.12  | -0.32 | -0.29 | -0.05 | -0.10 | 7 Eukaryotic tra EIF2A                |
| -0.25 | -0.17 | -0.04 | -0.06 | -0.53 | 0.09  | -0.61 | -0.58 | -0.23 | 0.04  | -0.14 | 0.05  | 9 Translation ini EIF2B1              |
| 0.24  | 0.51  | -0.10 | 0.03  | -0.01 | 0.01  | 0.33  | 0.33  | -0.08 | 0.01  | -0.09 | -0.03 | 17 Eukaryotic tra EIF2S1              |
| 0.14  | 0.39  | -0.25 | -0.30 | -0.03 | -0.06 | 0.15  | 0.26  | -0.11 | -0.02 | -0.18 | -0.17 | 13 Eukaryotic tra EIF2S2              |
| 0.15  | 0.19  | -0.25 | -0.21 | -0.08 | -0.17 | 0.22  | 0.25  | -0.09 | -0.10 | -0.12 | -0.09 | 18 Eukaryotic tra EIF2S3;EIF2S3L      |
| 0.06  | 0.00  | -0.10 | -0.05 | -0.02 | -0.07 | -0.08 | -0.19 | 0.01  | -0.17 | 0.14  | 0.01  | 53 Eukaryotic tra EIF3A               |
| 0.05  | 0.00  | -0.20 | -0.13 | 0.00  | -0.02 | 0.02  | -0.07 | -0.09 | -0.19 | 0.14  | 0.01  | 28 Eukaryotic tra EIF3B               |
| 0.09  | 0.11  | 0.16  | 0.02  | -0.07 | -0.12 | -0.13 | -0.28 | 0.00  | -0.12 | 0.14  | 0.00  | 29 Eukaryotic tra EIF3C;EIF3CL        |
| -0.06 | -0.27 | 0.09  | 0.15  | 0.00  | -0.13 | -0.19 | -0.30 | -0.18 | -0.24 | -0.09 | -0.71 | 5 Eukaryotic tra EIF3D                |
| 0.13  | 0.03  | -0.01 | -0.10 | 0.09  | -0.07 | -0.26 | -0.33 | 0.07  | -0.14 | 0.08  | -0.06 | 20 Eukaryotic tra EIF3E               |
| 0.06  | 0.01  | 0.04  | 0.02  | -0.03 | -0.05 | -0.13 | -0.34 | -0.02 | -0.18 | 0.03  | -0.03 | 11 Eukaryotic tra EIF3F               |
| -0.05 | -0.18 | -0.15 | -0.06 | -0.05 | -0.12 | -0.09 | -0.15 | -0.18 | -0.27 | -0.06 | -0.13 | 11 Eukaryotic tra EIF3G               |
| -0.13 | -0.08 | 0.18  | 0.05  | 0.27  | 0.11  | -0.34 | -0.38 | 0.10  | -0.02 | 0.09  | -0.01 | 10 Eukaryotic tra EIF3H               |
| 0.06  | 0.03  | 0.14  | -0.02 | 0.06  | -0.02 | 0.08  | -0.12 | -0.04 | -0.04 | 0.14  | -0.01 | 13 Eukaryotic tra EIF3I               |
| 0.05  | 0.13  | 0.18  | 0.02  | 0.11  | 0.00  | -0.28 | -0.15 | -0.01 | -0.12 | 0.04  | -0.04 | 7 Eukaryotic tra EIF3K                |
| 0.10  | 0.03  | 0.19  | -0.07 | 0.15  | 0.04  | -0.21 | -0.47 | 0.13  | -0.10 | 0.16  | 0.09  | 14 Eukaryotic tra EIF3L               |
| -0.04 | -0.12 | 0.15  | -0.02 | -0.01 | -0.12 | -0.06 | -0.13 | -0.04 | -0.14 | -0.02 | -0.08 | 34 Eukaryotic ini EIF4A1              |
| 0.36  | 0.19  | -0.26 | -0.44 | -0.02 | -0.14 | 0.28  | 0.08  | 0.34  | -0.15 | 0.04  | -0.25 | 17 Eukaryotic ini EIF4A3              |
| -0.12 | -0.03 | -0.17 | -0.45 | 0.07  | -0.06 | 0.06  | -0.28 | 0.06  | -0.17 | 0.23  | -0.10 | 12 Eukaryotic tra EIF4B               |
| 0.16  | 0.30  | -0.05 | 0.04  | 0.05  | 0.00  | -0.04 | -0.10 | 0.08  | 0.02  | 0.04  | 0.01  | 5 Eukaryotic tra EIF4E                |
| 0.07  | 0.13  | -0.05 | -0.13 | 0.17  | 0.15  | -0.49 | -0.48 | -0.06 | -0.16 | 0.09  | 0.00  | 51 Eukaryotic tra EIF4G1              |
| -0.04 | 0.15  | -0.36 | -0.65 | -0.25 | -0.23 | -0.20 | -0.34 | 0.00  | -0.24 | -0.04 | -0.28 | 21 Eukaryotic tra EIF4G2              |
| 0.09  | 0.03  | 0.07  | 0.12  | -0.13 | 0.02  | -0.04 | -0.12 | -0.16 | -0.10 | 0.08  | -0.02 | 12 Eukaryotic tra EIF4H               |
| -0.11 | 0.01  | -0.36 | -0.30 | -0.02 | 0.03  | 0.07  | 0.10  | 0.16  | -0.03 | -0.46 | -0.28 | 8 Eukaryotic tra EIF5                 |
| -0.23 | -0.29 | 0.02  | 0.01  | -0.06 | -0.08 | -0.10 | -0.08 | -0.06 | -0.10 | 0.00  | 0.03  | 17 Eukaryotic tra EIF5A;EIF5A1;EIF5A2 |
| -0.09 | 0.13  | -0.13 | -0.01 | -0.04 | -0.12 | -0.19 | -0.17 | -0.06 | -0.26 | 0.05  | 0.13  | 43 Eukaryotic tra EIF5B               |
| 0.34  | 0.34  | 0.10  | 0.06  | -0.31 | -0.17 | 0.59  | 0.72  | -0.35 | -0.15 | -0.32 | -0.06 | 6 Eukaryotic tra EIF6                 |
| -0.15 | -0.08 | 0.24  | -0.28 | 0.04  | 0.16  | -0.43 | -0.36 | 0.53  | 0.47  | 0.03  | -0.02 | 9 ELAV-like prot ELAVL1               |
| 0.10  | 0.44  | 0.07  | 0.49  | -0.27 | 0.16  | -0.43 | -0.39 | 0.26  | 0.18  | -0.42 | -0.13 | 2 Elongation of ELOVL1                |
| 0.09  | -0.08 | -0.34 | -0.14 | -0.17 | -0.19 | 0.11  | 0.30  | -0.18 | -0.14 | -0.05 | 0.11  | 10 ER membrane EMC1                   |
| 0.01  | 0.07  | 0.26  | 0.09  | 0.07  | 0.00  | -0.36 | 0.00  | -0.39 | -0.56 | -0.16 | -0.13 | 7 Echinoderm r EML4                   |
| 0.02  | -0.01 | 0.12  | 0.13  | -0.19 | -0.19 | 0.58  | 0.77  | 0.22  | 0.00  | 0.18  | 0.06  | 11 Protein enabl ENAH                 |
| -0.13 | -0.08 | 0.00  | 0.02  | -0.02 | -0.05 | 0.17  | 0.19  | -0.04 | 0.01  | 0.06  | 0.08  | 36 Alpha-enolase ENO1                 |
| 0.10  | -0.02 | -0.03 | -0.42 | 0.28  | 0.66  | -0.97 | -0.25 | -1.08 | -1.30 | -0.48 | -0.62 | 7 Band 4.1-like  EPB41L2              |
| -0.11 | 0.18  | -0.15 | 0.09  | -0.33 | -0.21 | 0.01  | 0.14  | -0.06 | 0.11  | 0.06  | 0.35  | 71 Bifunctional g EPRS                |

|       |       |       |       |       |       |       |       |       |       |       |       |                           |
|-------|-------|-------|-------|-------|-------|-------|-------|-------|-------|-------|-------|---------------------------|
| 1.16  | 0.37  | 0.24  | -0.23 | 0.17  | 0.13  | -1.47 | -1.26 | -1.07 | -0.81 | -0.32 | -0.43 | 12 Endoplasmic r ERAP1    |
| -0.10 | 0.11  | 0.05  | 0.40  | 0.04  | 0.17  | 0.24  | 0.53  | -0.19 | 0.11  | 0.09  | 0.29  | 28 ELKS/Rab6-int ERC1     |
| 0.33  | 0.13  | 0.16  | 0.10  | -0.03 | 0.14  | 0.21  | 0.25  | -0.08 | -0.18 | 0.10  | -0.18 | 4 Erlin-1 ERLIN1          |
| 0.03  | -0.26 | -0.10 | 0.11  | -0.08 | -0.10 | -0.06 | -0.06 | 0.27  | 0.31  | -0.47 | -0.35 | 12 ERO1-like pro ERO1L    |
| 0.19  | -0.14 | -0.18 | -0.23 | -0.06 | 0.09  | 0.05  | -0.08 | -0.07 | 0.03  | -0.04 | -0.09 | 10 Endoplasmic r ERP29    |
| -0.05 | 0.05  | 0.11  | 0.02  | -0.24 | -0.03 | -0.08 | 0.19  | -0.12 | 0.21  | -0.26 | 0.07  | 9 Endoplasmic r ERP44     |
| 0.18  | 0.34  | 0.26  | 0.14  | 0.04  | 0.11  | 0.36  | 0.27  | -0.14 | 0.05  | 0.07  | 0.14  | 12 S-formylglutat ESD     |
| 0.12  | -0.19 | -0.29 | -0.52 | 0.12  | 0.02  | 0.31  | 0.36  | 0.09  | -0.01 | 0.18  | 0.06  | 34 Extended syn ESYT1     |
| -0.09 | 0.04  | -0.37 | -0.07 | 0.00  | -0.10 | 0.04  | -0.02 | -0.05 | -0.04 | 0.02  | 0.16  | 10 Eukaryotic pe ETF1     |
| 0.38  | 0.64  | 0.02  | 0.41  | -0.18 | -0.27 | -0.01 | 0.12  | 0.10  | 0.11  | 0.01  | -0.01 | 16 Electron trans ETFB    |
| -0.38 | 0.01  | -0.18 | 0.35  | -0.40 | -0.04 | -0.76 | -0.40 | -0.09 | 0.58  | -0.32 | 0.28  | 10 Protein ETHE1 ETHE1    |
| -0.10 | -0.28 | 0.00  | -0.02 | 0.18  | 0.27  | -0.66 | -0.38 | -0.04 | -0.10 | 0.10  | -0.10 | 4 RNA-binding EWSR1       |
| -0.12 | 0.17  | -0.02 | 0.48  | -0.18 | -0.11 | 0.04  | 0.27  | 0.33  | 0.30  | -0.06 | 0.21  | 45 Ezrin EZR              |
| 0.21  | -0.71 | 1.35  | -0.22 | -0.04 | -0.40 | -1.03 | -1.77 | -0.46 | -0.94 | -0.68 | -1.24 | 3 Tissue factor F3        |
| -1.42 | 0.95  | -1.09 | 0.98  | -0.69 | -1.00 | 1.36  | 1.96  | 1.20  | 0.93  | 0.23  | 1.10  | 22 Fatty acid-bin FABP5   |
| -0.10 | -0.73 | 1.14  | -0.06 | 0.07  | 0.37  | 0.32  | -0.05 | -0.25 | -0.69 | -0.19 | -0.38 | 3 Fatty acid des FADS2    |
| 0.12  | -0.18 | 0.19  | -0.26 | 0.30  | -0.04 | 0.00  | -0.35 | 0.05  | -0.12 | 0.04  | -0.27 | 15 Constitutive c FAM120A |
| -0.32 | 0.15  | -0.24 | 0.11  | -0.44 | -0.13 | -1.07 | -0.50 | -0.21 | 0.32  | 0.20  | 1.20  | 13 Protein Niban FAM129A  |
| 0.14  | 0.41  | 0.17  | 0.40  | -0.21 | -0.19 | 0.49  | 0.40  | 0.08  | -0.07 | 0.06  | 0.35  | 20 Niban-like pro FAM129B |
| -0.85 | 1.23  | -1.58 | -0.36 | -0.96 | -1.28 | 1.81  | 2.54  | -0.14 | -0.01 | 0.73  | 1.84  | 9 Redox-regulat FAM213A   |
| -0.09 | 0.23  | -0.14 | 0.24  | -0.37 | -0.26 | -0.09 | -0.21 | 0.28  | -0.30 | 0.17  | 0.24  | 7 Phenylalanine FARSA     |
| 0.02  | 0.29  | -0.13 | 0.22  | -0.32 | -0.28 | 0.07  | -0.08 | 0.05  | 0.26  | 0.02  | 0.16  | 11 Phenylalanine FARSB    |
| 0.15  | 0.25  | 0.18  | 0.03  | -0.14 | -0.34 | -0.15 | -0.30 | -0.07 | -0.38 | 0.19  | 0.13  | 146 Fatty acid syn FASN   |
| -0.43 | -0.87 | 0.42  | -0.71 | -0.34 | -0.90 | -0.60 | -0.63 | 0.07  | -0.16 | 0.43  | -0.09 | 54 Protocadherir FAT1     |
| 0.17  | -0.59 | 1.52  | 0.32  | 0.30  | -0.38 | 0.53  | 0.31  | -0.29 | -0.90 | 0.27  | -0.35 | 24 Protocadherir FAT2     |
| -0.49 | -0.51 | 0.01  | -0.12 | -0.04 | 0.22  | -0.47 | -0.31 | -0.11 | 0.20  | -0.49 | -0.17 | 11 Filamin-bindir FBLIM1  |
| -0.29 | -1.53 | 0.42  | -1.19 | 0.57  | -0.27 | -1.38 | -1.76 | 0.17  | -0.40 | -0.17 | -1.11 | 26 Fibrillin-2 FBN2       |
| 0.72  | 0.25  | 0.83  | 0.05  | 0.11  | 0.48  | 0.13  | -0.22 | -0.34 | -0.53 | 0.21  | 0.17  | 12 Squalene synt FDFT1    |
| 0.10  | 0.07  | 0.04  | 0.06  | 0.02  | 0.06  | -0.48 | -0.53 | 0.00  | -0.03 | -0.03 | 0.07  | 9 Farnesyl pyro FDPS      |
| 0.04  | 0.10  | 0.18  | -0.16 | 0.05  | 0.06  | 0.12  | 0.17  | -0.18 | -0.18 | 0.08  | 0.04  | 9 Flap endonucl FEN1      |
| -0.19 | -0.10 | -0.03 | 0.04  | -0.04 | -0.04 | 0.12  | 0.27  | -0.09 | 0.05  | 0.15  | 0.25  | 17 Fumarate hyd FH        |
| 0.61  | -0.14 | 0.29  | 0.14  | 0.00  | 0.18  | -1.83 | -1.78 | -0.53 | -0.21 | 0.14  | -0.11 | 13 Four and a ha FHL1     |
| 0.27  | 0.16  | 0.07  | -0.30 | 0.04  | 0.15  | 0.28  | 0.41  | -0.24 | 0.07  | -0.26 | -0.28 | 11 Peptidyl-proly FKBP3   |
| 0.16  | 0.24  | 0.09  | 0.19  | -0.17 | -0.13 | 0.23  | 0.18  | -0.12 | -0.12 | 0.18  | 0.09  | 23 Peptidyl-proly FKBP4   |
| -0.24 | 0.03  | 0.06  | -0.12 | 0.01  | -0.01 | 1.08  | 1.22  | -0.42 | -0.49 | 0.22  | 0.28  | 17 Peptidyl-proly FKBP5   |
| -0.27 | -0.31 | 0.01  | -0.09 | -0.20 | -0.03 | -0.63 | -0.52 | -0.08 | 0.18  | 0.06  | 0.16  | 19 Protein flightl FLII   |
| -0.23 | -0.24 | -0.04 | -0.10 | -0.17 | -0.16 | -0.17 | -0.13 | -0.18 | 0.04  | -0.10 | 0.00  | 167 Filamin-A FLNA        |
| -0.28 | -0.33 | -0.10 | -0.23 | -0.24 | -0.17 | -0.38 | -0.15 | -0.50 | -0.18 | -0.63 | -0.49 | 166 Filamin-A FLNA        |
| -0.20 | -0.33 | 0.02  | 0.23  | -0.03 | 0.06  | -0.65 | -0.83 | -0.02 | 0.28  | -0.41 | -0.23 | 193 Filamin-B FLNB        |
| -0.04 | -0.23 | -0.28 | 0.50  | 0.51  | 0.70  | 0.94  | 1.20  | 0.34  | 1.13  | 0.82  | 1.22  | 40 Filamin-C FLNC         |
| 1.16  | -0.74 | 0.93  | -0.67 | 0.39  | -0.46 | -1.02 | -2.03 | -0.02 | -0.27 | -2.89 | -3.83 | 26 Fibronectin;A FN1      |
| 0.00  | -0.04 | -0.01 | 0.04  | 0.13  | 0.17  | -0.56 | -0.58 | 0.16  | 0.17  | 0.05  | 0.03  | 35 Fascin FSCN1           |
| -0.16 | 0.23  | 0.49  | 0.31  | 0.05  | 0.18  | -0.21 | -0.10 | 0.03  | 1.12  | 0.23  | 0.46  | 8 Ferritin heavy FTH1     |
| 0.07  | 0.65  | 0.90  | 0.64  | -0.01 | -0.14 | -1.45 | -0.85 | 0.15  | 1.96  | -0.25 | 0.64  | 5 Ferritin light c FTL    |
| -0.03 | -0.06 | -0.22 | -0.14 | 0.07  | 0.00  | 0.01  | 0.05  | -0.20 | -0.07 | -0.20 | -0.17 | 19 Far upstream FUBP1     |
| -0.06 | -0.21 | 0.26  | -0.22 | 0.07  | 0.03  | 0.10  | -0.07 | 0.08  | -0.09 | 0.05  | -0.12 | 13 Ras GTPase-α G3BP1     |
| 0.11  | 0.11  | -0.70 | -0.27 | -0.38 | -0.17 | 0.62  | 0.75  | 0.02  | 0.33  | -0.36 | 0.31  | 17 Glucose-6-phc G6PD     |
| 0.06  | 0.03  | 0.00  | -0.08 | -0.06 | 0.01  | 0.23  | 0.41  | -0.25 | -0.16 | -0.09 | -0.04 | 46 Neutral alpha GANAB    |
| 0.05  | -0.12 | 0.27  | 0.07  | 0.04  | -0.01 | 0.13  | 0.13  | -0.16 | -0.12 | 0.14  | 0.08  | 31 Glyceraldehyc GAPDH    |
| 0.34  | 0.22  | 0.07  | -0.01 | 0.29  | 0.37  | 0.15  | 0.33  | -0.04 | -0.47 | 0.05  | 0.31  | 9 GTPase-activa GAPVD1    |

|       |       |       |       |       |       |       |       |       |       |       |       |                               |
|-------|-------|-------|-------|-------|-------|-------|-------|-------|-------|-------|-------|-------------------------------|
| -0.10 | 0.05  | -0.21 | 0.16  | -0.29 | -0.05 | -0.79 | -0.55 | -0.05 | 0.31  | -0.18 | 0.30  | 33 Glycine--tRNA GARS         |
| 0.16  | 0.21  | 0.05  | 0.01  | -0.04 | -0.11 | -0.03 | -0.09 | -0.25 | -0.41 | 0.10  | 0.09  | 35 Trifunctional γ GART       |
| 0.02  | 0.02  | 0.07  | -0.10 | 0.04  | 0.28  | -0.56 | 0.12  | -0.22 | -0.22 | -0.11 | 0.04  | 20 Golgi-specific GBF1        |
| 0.04  | 0.11  | -0.07 | -0.51 | 0.12  | -0.07 | 0.01  | -0.13 | -0.08 | -0.50 | 0.15  | -0.02 | 104 Translational δ GCN1L1    |
| -0.02 | -0.05 | 0.00  | 0.06  | 0.11  | 0.00  | -0.04 | 0.02  | 0.00  | -0.04 | 0.00  | 0.00  | 29 Rab GDP dissoc GDI2        |
| -0.07 | -0.21 | -0.09 | -0.41 | -0.16 | -0.27 | 0.37  | 0.19  | -0.01 | -0.63 | 0.10  | -0.15 | 21 Gem-associat GEMIN5        |
| 0.02  | -0.17 | 0.00  | 0.02  | -0.62 | -0.36 | -0.85 | -0.70 | 0.29  | 0.53  | -0.18 | 0.19  | 21 Glutamine--fr GFPT1        |
| -0.11 | 0.68  | -0.21 | 0.87  | -0.22 | -0.05 | 0.36  | 0.69  | 0.47  | 0.37  | 0.11  | 0.60  | 8 Gamma-gluta GGCT            |
| 0.04  | 0.05  | 0.38  | 0.11  | 0.09  | -0.04 | -0.40 | -0.52 | 0.16  | -0.22 | 0.11  | 0.18  | 13 PERQ amino α GIGYF2        |
| -0.03 | -0.67 | 0.77  | 0.11  | -1.06 | -1.04 | -0.03 | 0.05  | 0.07  | 0.01  | 0.26  | 0.11  | 11 Golgi apparat GLG1         |
| 0.13  | 0.50  | -0.01 | 0.35  | 0.05  | 0.16  | -0.04 | 0.08  | 0.03  | 0.22  | 0.24  | 0.41  | 11 Lactoylglutath GLO1        |
| -0.09 | 0.16  | -0.54 | -0.17 | -0.06 | -0.05 | 0.32  | 0.46  | -0.01 | 0.01  | 0.03  | 0.11  | 14 Glutaredoxin- GLRX3        |
| -0.01 | 0.38  | 0.32  | 0.67  | -0.13 | -0.25 | 0.23  | 0.44  | -0.01 | 0.11  | 0.08  | 0.27  | 17 Glutamate de GLUD1;GLUD2   |
| 0.25  | -1.01 | 2.04  | -0.45 | 0.07  | -1.38 | 0.46  | -0.34 | -1.05 | -2.28 | 0.98  | -0.61 | 11 Glutamine syr GLUL         |
| 0.06  | 0.56  | -0.87 | 0.31  | -0.64 | -0.33 | 1.07  | 1.33  | 0.93  | 1.06  | 0.07  | 0.66  | 6 Ganglioside G GM2A          |
| -0.12 | -0.37 | 0.15  | -0.08 | -0.34 | -0.22 | -0.52 | -0.55 | -0.13 | 0.04  | -0.39 | 0.00  | 6 Mannose-1-ph GMPPA          |
| -0.32 | -0.37 | 0.13  | 0.13  | -0.32 | -0.19 | -0.52 | -0.32 | -0.07 | 0.03  | -0.19 | 0.19  | 9 Mannose-1-ph GMPPB          |
| 0.24  | 0.25  | 0.20  | 0.11  | 0.08  | 0.06  | 0.08  | 0.10  | -0.07 | -0.27 | -0.15 | -0.25 | 21 GMP synthase GMPS          |
| 0.02  | -0.37 | 0.25  | 0.07  | 0.18  | 0.25  | 0.14  | 0.24  | -0.07 | 0.03  | -0.04 | 0.05  | 15 Guanine nucle GNAI2        |
| -0.08 | -0.56 | -1.18 | -1.35 | 0.20  | 0.13  | -0.07 | -0.13 | 0.20  | 0.76  | -0.24 | -0.31 | 11 Guanine nucle GNAI3        |
| 0.05  | 0.26  | 0.17  | -0.06 | -0.84 | -0.78 | 0.65  | 0.63  | -0.47 | -0.52 | -0.22 | -0.20 | 6 Guanine nucle GNAS          |
| 0.05  | -0.23 | 0.33  | 0.10  | 0.02  | 0.23  | 0.13  | 0.14  | -0.07 | 0.16  | 0.01  | 0.03  | 11 Guanine nucle GNB1         |
| 0.04  | -0.06 | 0.08  | -0.07 | 0.00  | -0.06 | 0.01  | -0.14 | -0.38 | -0.29 | 0.13  | -0.01 | 21 Guanine nucle GNB2L1       |
| 0.09  | 0.11  | -0.13 | 0.28  | 0.04  | 0.00  | 0.03  | -0.08 | 0.08  | 0.03  | 0.14  | 0.13  | 6 Glucosamine γ GNPAT1        |
| 0.06  | 0.11  | 0.44  | 0.17  | -0.38 | -0.32 | 0.38  | 0.29  | 0.06  | 0.07  | -0.74 | -0.59 | 14 Golgin subfar GOLGA2       |
| 0.08  | 0.04  | -0.18 | 0.00  | 0.04  | -0.04 | 0.10  | -0.01 | 0.05  | -0.01 | -0.37 | -0.10 | 14 Golgin subfar GOLGA3       |
| 0.11  | 0.17  | 0.14  | 0.34  | 0.11  | 0.20  | -0.01 | 0.03  | 0.16  | -0.11 | 0.10  | 0.36  | 25 Golgin subfar GOLGA4       |
| 0.28  | 0.18  | 0.20  | 0.40  | -0.20 | -0.09 | -0.25 | -0.26 | 0.11  | 0.16  | -0.17 | 0.12  | 87 Golgin subfar GOLGB1       |
| 0.16  | -0.22 | 0.31  | -0.22 | 0.13  | 0.21  | -1.00 | -0.61 | -0.07 | 1.09  | 0.29  | -0.13 | 8 Golgi integral GOLIM4       |
| -0.04 | 0.14  | 0.03  | 0.12  | -0.34 | 0.01  | 0.08  | 0.39  | -0.07 | -0.01 | -0.10 | 0.24  | 13 Aspartate ami GOT1         |
| -0.01 | 0.12  | 0.11  | 0.30  | -0.21 | -0.20 | 0.02  | 0.10  | 0.09  | 0.28  | 0.06  | 0.27  | 24 Aspartate ami GOT2         |
| -0.02 | 0.26  | -0.35 | 0.08  | -0.08 | -0.17 | 0.15  | 0.15  | 0.14  | 0.04  | 0.30  | 0.38  | 22 Glucose-6-phc GPI          |
| 0.03  | -0.16 | 0.09  | 0.15  | 0.05  | 0.04  | -0.06 | -0.11 | -0.16 | -0.06 | 0.05  | 0.05  | 11 Glutathione p GPX1         |
| 0.10  | 0.06  | -0.17 | -0.06 | 0.06  | 0.00  | 0.13  | 0.16  | 0.06  | 0.11  | -0.21 | -0.16 | 8 Glutathione p GPX4          |
| -0.01 | 0.15  | 0.28  | 0.33  | 0.18  | 0.25  | 0.40  | -0.05 | 0.02  | -0.03 | 0.00  | 0.16  | 8 Growth factor GRB2          |
| 0.11  | 0.19  | 0.04  | 0.06  | -0.16 | -0.27 | 0.15  | -0.12 | -0.08 | -0.07 | -0.06 | -0.22 | 12 GrpE protein γ GRPEL1      |
| -0.26 | -0.30 | -0.88 | -0.87 | -0.79 | -0.82 | -0.67 | -0.35 | -0.80 | -1.07 | -1.54 | -1.75 | 21 Gelsolin GSN               |
| 0.15  | 0.27  | -0.16 | -0.06 | 0.27  | -0.02 | -0.08 | -0.19 | -0.02 | -0.10 | 0.26  | 0.25  | 13 Eukaryotic peγ GSPT1;GSPT2 |
| 0.83  | 0.74  | -0.22 | -0.09 | -0.17 | -0.06 | 0.63  | 0.52  | -0.54 | -0.32 | -0.30 | -0.16 | 9 Glutathione sγ GSS          |
| -0.02 | -0.09 | 0.18  | 0.28  | -0.02 | 0.10  | 0.20  | 0.25  | -0.34 | 0.05  | -0.18 | 0.20  | 7 Glutathione S- GSTK1        |
| 0.63  | 0.49  | -0.39 | -0.14 | -0.24 | -0.07 | 0.07  | 0.27  | -0.38 | -0.29 | 0.14  | 0.36  | 8 Glutathione S- GSTM3        |
| 0.26  | 0.23  | -0.57 | -0.30 | 0.10  | 0.21  | -0.12 | -0.06 | 0.43  | 0.52  | 0.08  | 0.20  | 15 Glutathione S- GSTO1       |
| -0.45 | 0.02  | -0.13 | 0.45  | -0.02 | 0.02  | 0.04  | 0.43  | 0.06  | 0.22  | 0.19  | 0.32  | 17 Glutathione S- GSTP1       |
| 0.14  | 0.04  | 0.49  | -0.24 | 0.36  | -0.03 | 0.50  | 0.33  | -0.11 | -0.68 | 0.24  | -0.26 | 27 General transγ GTF2I       |
| 0.05  | 0.38  | 0.05  | 0.32  | -0.03 | -0.13 | 0.43  | 0.71  | -0.12 | -0.10 | 0.17  | 0.20  | 31 Trifunctional ε HADHA      |
| 0.00  | 0.39  | -0.48 | 0.13  | -0.05 | -0.05 | 0.36  | 0.66  | -0.11 | -0.08 | 0.07  | 0.19  | 16 Trifunctional ε HADHB      |
| -0.12 | -0.09 | 0.06  | 0.03  | -0.16 | -0.10 | 0.19  | 0.29  | -0.20 | 0.36  | 0.09  | 0.09  | 14 Histidine--tRN HARS        |
| 0.27  | 0.27  | 0.35  | 0.07  | -0.09 | 0.04  | 0.10  | 0.08  | -0.19 | -0.14 | 0.03  | 0.10  | 5 Histone acetyl HAT1         |
| -0.20 | -0.18 | -0.43 | -0.41 | 0.27  | 0.09  | 0.13  | -0.11 | -0.22 | -0.35 | 0.14  | -0.19 | 17 Host cell factc HCFC1      |
| -0.09 | -0.02 | -0.47 | -0.30 | 0.00  | -0.12 | 0.01  | -0.08 | -0.36 | -0.35 | -0.23 | -0.27 | 16 Hepatoma-de HDGF           |



|       |       |       |       |       |       |       |       |       |       |       |       |    |                 |                          |
|-------|-------|-------|-------|-------|-------|-------|-------|-------|-------|-------|-------|----|-----------------|--------------------------|
| -0.02 | -0.30 | 0.11  | -0.27 | -0.03 | -0.16 | -0.32 | -0.46 | 0.06  | -0.17 | 0.02  | -0.06 | 58 | Vigilin         | HDLBP                    |
| 0.20  | 0.56  | -0.28 | -0.34 | 0.06  | -0.39 | -0.33 | -0.38 | 0.21  | -0.07 | -0.51 | -1.50 | 7  | HEAT repeat-c   | HEATR1                   |
| -0.25 | 0.36  | -0.46 | 0.56  | -0.06 | -0.01 | 0.16  | 0.14  | 0.30  | 0.39  | -0.17 | -0.07 | 7  | Heme-binding    | HEBP2                    |
| -0.10 | 0.35  | 0.53  | 0.00  | 0.09  | 0.48  | -0.22 | 0.08  | 0.24  | -0.04 | -0.06 | -0.01 | 8  | E3 ubiquitin-p  | HECTD1                   |
| -0.04 | -0.10 | -0.05 | 0.22  | 0.05  | 0.03  | 0.31  | 0.32  | -0.16 | -0.17 | 0.13  | 1.07  | 12 | Probable E3 u   | HERC4                    |
| 0.08  | 0.35  | -0.23 | 0.32  | 0.28  | 0.19  | 0.02  | 0.20  | 0.23  | 0.49  | 0.02  | 0.14  | 7  | Beta-hexosam    | HEXB                     |
| 0.03  | 0.50  | -0.45 | 0.31  | 0.06  | 0.66  | 0.26  | 0.63  | 0.48  | 0.58  | 0.15  | 0.76  | 17 | Huntingtin-int  | HIP1R                    |
| 0.14  | -0.56 | -0.18 | -1.70 | -0.23 | 0.17  | -0.61 | -0.49 | -0.49 | -0.82 | -0.12 | -1.05 | 15 | Histone H1.2;   | HIST1H1C;HIST1H1E        |
| -0.60 | -0.88 | 0.11  | -0.03 | -0.58 | 0.04  | 0.17  | 0.88  | -0.55 | 0.22  | 0.13  | 0.18  | 7  | Histone H2A t   | HIST1H2AJ;HIST1H2AH;H2AF |
| -0.04 | -0.52 | 0.25  | 0.07  | -0.52 | 0.05  | 0.22  | 0.62  | -0.52 | 0.60  | 0.21  | -0.37 | 7  | Histone H2B t   | HIST1H2BL;HIST1H2BM;HIST |
| -0.50 | -0.06 | -0.57 | -0.22 | 0.19  | 0.06  | 0.51  | 0.64  | 0.88  | 1.45  | -0.16 | 0.29  | 26 | Hexokinase-1    | HK1                      |
| -0.15 | 0.23  | -0.09 | -0.07 | -0.01 | -0.26 | 0.45  | 0.24  | 0.27  | 0.05  | 0.55  | 0.31  | 19 | Hexokinase-2    | HK2                      |
| 0.38  | -0.11 | 1.41  | 0.43  | 0.71  | 0.58  | -1.65 | -1.59 | -1.78 | -1.16 | -0.93 | -0.92 | 12 | HLA class I his | HLA-A                    |
| -0.15 | -0.11 | -0.07 | -0.10 | 0.14  | 0.11  | 0.31  | 0.32  | -0.28 | -0.16 | -0.08 | -0.17 | 18 | High mobility   | HMGB1                    |
| -0.12 | -0.56 | 0.45  | -0.33 | -0.19 | -0.31 | -1.05 | -1.19 | -0.14 | -0.54 | -0.25 | -0.19 | 14 | Hydroxymeth     | HMGCS1                   |
| -0.23 | -0.21 | 0.11  | 0.19  | 0.21  | 0.19  | -0.23 | -0.19 | 0.18  | 0.05  | -0.08 | -0.30 | 4  | Hematologica    | HN1                      |
| -0.14 | -0.43 | -0.06 | -0.05 | 0.02  | 0.14  | 0.11  | 0.11  | 0.01  | 0.03  | -0.01 | -0.10 | 8  | Hematologica    | HN1L                     |
| -0.15 | -0.45 | -0.33 | -0.53 | 0.01  | -0.02 | -0.19 | -0.25 | 0.19  | 0.44  | -0.14 | -0.29 | 17 | Heterogeneo     | HNRNPA1;HNRNPA1L2        |
| -0.07 | -0.58 | -0.40 | -0.74 | 0.14  | 0.13  | -0.17 | -0.16 | 0.18  | 0.12  | -0.10 | -0.52 | 15 | Heterogeneo     | HNRNPA2B1                |
| -0.06 | -0.36 | -0.10 | -0.80 | 0.10  | 0.03  | 0.20  | 0.00  | 0.25  | 0.11  | -0.08 | -0.48 | 7  | Heterogeneo     | HNRNPAB                  |
| 0.02  | -0.12 | -0.25 | -0.41 | 0.19  | 0.06  | -0.09 | -0.23 | -0.08 | -0.13 | -0.18 | -0.32 | 12 | Heterogeneo     | HNRNPD                   |
| -0.01 | -0.26 | -0.32 | -0.37 | -0.01 | -0.09 | -0.23 | -0.22 | 0.18  | 0.13  | 0.00  | 0.03  | 9  | Heterogeneo     | HNRNPF                   |
| -0.19 | -0.76 | -0.19 | -0.49 | 0.20  | 0.09  | -0.33 | -0.43 | 0.33  | 0.47  | -0.29 | -0.10 | 10 | Heterogeneo     | HNRNPH1                  |
| -0.06 | -0.17 | -0.15 | -0.14 | 0.15  | 0.08  | 0.25  | 0.17  | 0.02  | -0.09 | -0.16 | -0.10 | 26 | Heterogeneo     | HNRNPK                   |
| -0.13 | -0.73 | -0.01 | -0.83 | 0.37  | 0.12  | -0.34 | -0.33 | 0.20  | -0.19 | -0.13 | -0.80 | 9  | Heterogeneo     | HNRNPL                   |
| 0.02  | 0.02  | -0.22 | -0.30 | 0.15  | 0.15  | 0.02  | -0.03 | -0.12 | -0.28 | 0.08  | -0.09 | 37 | Heterogeneo     | HNRNPM                   |
| -0.33 | -0.50 | -0.22 | -0.39 | 0.17  | 0.03  | -0.31 | -0.39 | 0.12  | 0.13  | -0.06 | -0.26 | 30 | Heterogeneo     | HNRNPU                   |
| -0.01 | 0.02  | -0.06 | -0.48 | -0.21 | -0.17 | -0.45 | -0.17 | -0.34 | -0.44 | -0.22 | -0.40 | 12 | Heterogeneo     | HNRNPUL1                 |
| 0.47  | 0.29  | 0.18  | 0.06  | 0.15  | 0.12  | -0.23 | -0.32 | -0.32 | -0.29 | -0.02 | -0.03 | 10 | Hypoxanthine    | HPRT1                    |
| -0.26 | 0.17  | -0.06 | 0.02  | -0.29 | -0.27 | 0.34  | 0.44  | -0.15 | 0.00  | -0.04 | 0.11  | 13 | 3-hydroxyacyl   | HSD17B10                 |
| -0.09 | 0.18  | -0.11 | 0.05  | -0.08 | 0.03  | 0.64  | 0.82  | -0.08 | 0.09  | 0.08  | 0.29  | 25 | Peroxisomal n   | HSD17B4                  |
| 0.16  | 0.08  | 0.16  | 0.15  | 0.15  | 0.23  | 0.07  | 0.08  | -0.02 | 0.02  | -0.07 | -0.08 | 63 | Heat shock pr   | HSP90AA1                 |
| 0.07  | -0.06 | 0.08  | 0.02  | 0.09  | 0.09  | 0.08  | 0.03  | -0.07 | -0.10 | -0.04 | -0.06 | 64 | Heat shock pr   | HSP90AB1                 |
| -0.10 | -0.52 | 0.05  | -0.37 | -0.25 | -0.26 | -0.57 | -0.46 | 0.32  | 0.51  | -0.52 | -0.56 | 70 | Endoplasmin     | HSP90B1                  |
| -0.75 | -0.57 | -0.17 | 0.23  | 0.40  | 0.41  | 0.33  | 0.95  | 1.02  | 0.71  | 0.44  | 0.46  | 33 | Heat shock-re   | HSPA2                    |
| -0.06 | 0.08  | -0.09 | 0.12  | 0.07  | 0.05  | 0.36  | 0.35  | 0.02  | -0.01 | 0.08  | 0.07  | 60 | Heat shock 70   | HSPA4                    |
| -0.41 | 0.26  | 0.17  | 0.86  | -0.21 | 0.04  | 0.00  | 0.31  | -0.07 | -0.20 | 0.58  | 1.07  | 30 | Heat shock 70   | HSPA4L                   |
| -0.34 | -0.70 | -0.21 | -0.45 | -0.43 | -0.49 | -0.76 | -0.57 | 0.21  | 0.44  | -0.62 | -0.58 | 54 | 78 kDa glucos   | HSPA5                    |
| -0.14 | -0.25 | -0.09 | -0.05 | -0.07 | -0.15 | -0.13 | 0.01  | 0.03  | 0.13  | -0.19 | -0.15 | 10 | Heat shock 70   | HSPA6                    |
| -0.03 | -0.05 | 0.05  | -0.01 | 0.05  | -0.05 | 0.01  | -0.05 | 0.07  | 0.01  | 0.00  | -0.02 | 46 | Heat shock co   | HSPA8                    |
| 0.10  | 0.30  | -0.08 | -0.07 | -0.07 | -0.21 | 0.47  | 0.46  | -0.03 | 0.05  | 0.08  | -0.02 | 36 | Stress-70 prot  | HSPA9                    |
| -0.49 | 0.61  | -0.78 | 0.84  | -0.82 | -1.12 | 1.48  | 1.77  | 0.26  | -0.02 | -0.28 | 0.41  | 23 | Heat shock pr   | HSPB1                    |
| 0.06  | 0.16  | 0.07  | 0.19  | -0.05 | -0.18 | 0.22  | 0.07  | -0.03 | -0.02 | 0.10  | 0.10  | 44 | 60 kDa heat sl  | HSPD1                    |
| -0.16 | 0.16  | -0.29 | 0.20  | -0.12 | -0.09 | 0.19  | 0.39  | 0.20  | 0.23  | 0.13  | 0.41  | 41 | Heat shock pr   | HSPH1                    |
| -0.17 | 0.03  | 0.21  | 0.04  | 0.10  | 0.04  | 0.36  | 0.31  | 0.01  | -0.29 | 0.17  | 0.16  | 60 | E3 ubiquitin-p  | HUWE1                    |
| -0.27 | -0.45 | -0.38 | -0.66 | -0.67 | -0.72 | -0.27 | -0.24 | 0.05  | 0.17  | -0.23 | -0.19 | 51 | Hypoxia up-re   | HYOU1                    |
| -0.07 | -0.07 | -0.15 | -0.06 | -0.27 | -0.31 | -0.12 | -0.19 | -0.09 | 0.01  | 0.10  | 0.13  | 46 | Isoleucine--tR  | IARS                     |
| 0.01  | 0.43  | 0.02  | 0.25  | 0.28  | -0.02 | 0.29  | 0.39  | 0.12  | 0.04  | -0.18 | -0.02 | 20 | Isoleucine--tR  | IARS2                    |
| -0.21 | -0.51 | 0.03  | -0.05 | 0.19  | 0.27  | -0.52 | -0.44 | -0.16 | 0.17  | -0.13 | -0.07 | 16 | Isocitrate deh  | IDH1                     |
| -0.09 | 1.18  | -0.31 | 0.69  | 0.17  | 0.07  | 1.26  | 1.72  | 0.91  | 0.81  | -0.26 | 0.36  | 11 | Isocitrate deh  | IDH2                     |

|       |       |       |       |       |       |       |       |       |       |       |       |                              |
|-------|-------|-------|-------|-------|-------|-------|-------|-------|-------|-------|-------|------------------------------|
| 0.13  | 0.08  | 0.37  | 0.20  | -0.15 | -0.15 | 0.11  | -0.22 | 0.04  | -0.08 | -0.55 | -0.31 | 11 Isopentenyl-d IDI1        |
| 0.04  | -0.22 | 0.21  | 0.00  | 0.18  | 0.27  | -1.20 | -0.86 | -0.43 | -0.33 | 0.06  | 0.01  | 23 Gamma-interf IFI16        |
| -0.17 | -0.59 | -0.04 | 0.12  | -0.04 | 0.00  | 0.02  | 0.24  | 0.00  | 0.08  | -0.39 | -0.32 | 9 Insulin-like gr IGF2BP3    |
| -0.77 | -0.54 | 0.19  | 0.18  | -0.10 | 0.13  | -0.29 | -0.10 | 0.24  | 0.36  | -0.30 | -0.18 | 45 Cation-indepe IGF2R       |
| -0.15 | -0.09 | -0.26 | -0.24 | -0.14 | 0.00  | 0.21  | 0.38  | -0.09 | -0.20 | 0.01  | -0.15 | 18 Elongator con IKBKAP      |
| -0.05 | -0.10 | -0.03 | -0.38 | -0.02 | 0.13  | 0.15  | 0.08  | -0.08 | -0.11 | 0.02  | -0.32 | 7 Interleukin en ILF2        |
| 0.08  | -0.02 | -0.18 | -0.29 | 0.12  | 0.14  | 0.23  | 0.24  | -0.03 | -0.36 | 0.06  | -0.15 | 22 Interleukin en ILF3       |
| -0.27 | -0.23 | -0.14 | -0.38 | 0.20  | 0.23  | -0.17 | -0.09 | 0.22  | 0.53  | 0.09  | 0.13  | 22 Mitochondrial IMMT        |
| 0.27  | -0.02 | 0.02  | -0.31 | 0.22  | -0.11 | 0.27  | 0.01  | 0.25  | -0.18 | 0.18  | -0.33 | 18 Inosine-5-mor IMPDH2      |
| -0.05 | 0.17  | -0.21 | -0.99 | -0.31 | -0.51 | 0.37  | 0.17  | -0.16 | -0.49 | 0.05  | -0.23 | 21 Importin-4 IPO4           |
| -0.07 | -0.08 | -0.02 | -1.15 | 0.11  | 0.08  | 0.04  | -0.04 | -0.20 | -0.63 | -0.06 | -0.24 | 42 Importin-5 IPO5           |
| -0.03 | 0.09  | -0.21 | -0.09 | -0.10 | -0.12 | 0.06  | -0.05 | 0.04  | 0.07  | 0.10  | 0.11  | 30 Importin-7 IPO7           |
| -0.08 | 0.13  | -0.18 | -0.12 | 0.07  | 0.14  | 0.02  | 0.18  | -0.19 | -0.23 | 0.15  | 0.21  | 25 Importin-9 IPO9           |
| 0.04  | 0.10  | -0.07 | 0.07  | -0.11 | -0.17 | 0.30  | 0.32  | 0.16  | 0.02  | -0.07 | 0.03  | 103 Ras GTPase-ar IQGAP1     |
| 0.55  | -0.77 | 0.38  | -0.37 | 1.10  | 0.72  | -4.37 | -4.59 | -1.27 | -2.00 | 0.35  | 0.11  | 6 Ubiquitin-like ISG15       |
| 0.51  | 0.33  | 0.68  | 0.72  | -0.49 | -0.19 | -0.94 | -0.62 | -0.07 | 0.55  | -0.09 | -0.05 | 23 Integrin alpha ITGA2      |
| -0.32 | -0.32 | 1.13  | 0.50  | -0.32 | -0.03 | -0.14 | 0.33  | -0.62 | -0.46 | 0.19  | 0.10  | 17 Integrin alpha ITGA3      |
| -0.38 | -0.24 | 1.11  | 0.38  | -0.13 | -0.55 | 1.14  | 1.18  | -0.79 | -0.44 | 0.65  | 0.66  | 21 Integrin alpha ITGA6      |
| 0.43  | 0.05  | -0.04 | -0.30 | 0.21  | 0.17  | -0.35 | -0.15 | 0.19  | 0.19  | 0.37  | 0.14  | 12 Integrin alpha ITGAV      |
| -0.01 | -0.22 | 0.93  | 0.31  | -0.16 | -0.03 | -0.10 | 0.02  | -0.31 | -0.14 | 0.10  | -0.08 | 25 Integrin beta- ITGB1      |
| -0.51 | -0.21 | 1.25  | 0.71  | -0.20 | 0.10  | 0.54  | 0.78  | -0.67 | -0.51 | 0.49  | 0.72  | 61 Integrin beta- ITGB4      |
| 0.41  | -0.34 | 0.59  | 0.27  | 0.07  | -0.11 | -0.79 | -0.83 | -0.19 | -0.07 | 0.26  | -0.19 | 10 Integrin beta- ITGB6      |
| 0.18  | 0.32  | -0.06 | -0.10 | 0.30  | 0.12  | -0.51 | -0.17 | -0.06 | 0.01  | -0.39 | 0.18  | 19 Inositol 1,4,5- ITPR3     |
| -0.39 | 0.43  | 0.72  | 0.94  | -0.16 | -0.43 | 0.77  | 1.06  | 0.71  | 0.23  | 0.25  | 0.92  | 25 Junction plac JUP         |
| 0.03  | 0.19  | -0.12 | 0.03  | 0.01  | -0.07 | 0.13  | 0.06  | -0.14 | -0.30 | 0.11  | -0.01 | 25 Lysine--trNA I KARS       |
| -0.01 | -0.04 | 0.06  | -0.20 | 0.26  | 0.14  | 0.07  | 0.06  | -0.18 | -0.36 | 0.03  | -0.10 | 26 Far upstream KHSRP        |
| -0.01 | 0.01  | 0.19  | 0.36  | 0.02  | 0.20  | -0.36 | -0.46 | 0.07  | 0.31  | -0.35 | -0.16 | 16 WASH comple KIAA0196      |
| 0.13  | -0.24 | 0.28  | 0.29  | 0.15  | 0.03  | -0.25 | -0.18 | -0.14 | -0.20 | 0.12  | 0.20  | 12 WASH comple KIAA1033      |
| 0.05  | 0.22  | 0.01  | -0.26 | 0.03  | -0.10 | 0.33  | 0.16  | -0.15 | -0.27 | -0.32 | -0.37 | 18 DBIRD comple KIAA1967     |
| -0.07 | -0.06 | 1.06  | 0.69  | 0.18  | 0.17  | 0.24  | 0.02  | 0.09  | -0.62 | -0.15 | -0.03 | 10 Kinesin-like pr KIF11     |
| -0.09 | 0.15  | -0.12 | 0.27  | 0.03  | 0.02  | 0.14  | 0.19  | 0.20  | 0.21  | 0.09  | 0.30  | 61 Kinesin-1 hea KIF5B       |
| 0.31  | 0.07  | -0.03 | -0.03 | 0.48  | 0.36  | -0.15 | -0.47 | 0.14  | -0.03 | 0.06  | 0.10  | 4 Kinesin light c KLC2       |
| -0.25 | -0.19 | 0.96  | 0.25  | 0.13  | -0.15 | 0.16  | -0.27 | -0.07 | -0.44 | 0.36  | -0.12 | 11 Importin subu KPNA2       |
| 0.03  | 0.09  | 0.19  | -0.04 | 0.09  | 0.21  | 0.07  | -0.15 | 0.38  | 0.17  | 0.12  | 0.11  | 7 Importin subu KPNA4        |
| -0.01 | 0.04  | 0.00  | 0.07  | 0.00  | 0.02  | 0.06  | 0.05  | 0.00  | 0.03  | 0.00  | 0.05  | 30 Importin subu KPNB1       |
| -0.46 | -0.64 | -0.98 | -1.00 | 0.38  | 0.34  | 0.00  | 0.20  | 0.49  | -0.35 | 0.36  | -0.37 | 45 Keratin, type I KRT14     |
| -0.66 | 1.96  | -1.88 | 0.60  | -0.59 | -1.13 | 1.24  | 1.82  | 2.35  | 0.87  | 0.73  | 1.28  | 34 Keratin, type I KRT16     |
| -0.44 | -0.19 | -1.04 | -0.40 | 0.09  | 0.29  | -0.53 | 0.04  | 0.53  | -0.10 | 0.55  | 0.11  | 43 Keratin, type I KRT17;JUP |
| -0.33 | -0.55 | -0.79 | -0.88 | 0.35  | 0.26  | 0.00  | 0.35  | 0.60  | -0.03 | 0.09  | -0.35 | 59 Keratin, type I KRT5      |
| -0.18 | 0.03  | -1.42 | -0.78 | 0.25  | 0.27  | -0.20 | 0.19  | 0.52  | -0.55 | 0.31  | -0.15 | 53 Keratin, type I KRT6A     |
| -2.09 | -4.22 | -1.19 | -2.83 | 0.64  | 0.90  | -1.35 | -1.55 | -0.39 | -1.44 | -0.30 | -2.41 | 27 Keratin, type I KRT7      |
| 0.35  | 0.22  | 0.12  | 0.03  | -0.17 | -0.15 | 0.67  | 0.51  | 0.26  | 0.16  | 0.09  | 0.04  | 42 Kinectin KTN1             |
| -0.32 | 0.21  | 0.28  | 0.41  | -0.35 | -0.18 | -0.03 | 0.11  | 0.26  | 0.19  | -0.16 | 0.14  | 20 Ladinin-1 LAD1            |
| -0.51 | -1.21 | 0.98  | -0.13 | -0.03 | -0.15 | -1.09 | -1.06 | -0.03 | 0.26  | -0.63 | -0.71 | 37 Laminin subur LAMA3       |
| 0.40  | 0.29  | 0.67  | 0.28  | -0.16 | -0.20 | 0.55  | 0.83  | -0.41 | -0.23 | -0.41 | -0.21 | 32 Laminin subur LAMA5       |
| -0.20 | -0.55 | 1.26  | 0.51  | 0.25  | 0.37  | -0.07 | 0.03  | -0.19 | -0.32 | -0.26 | -0.61 | 34 Laminin subur LAMB1       |
| -0.20 | -0.59 | 0.40  | -0.62 | -0.15 | -0.26 | -1.10 | -1.12 | 0.34  | 0.96  | -0.72 | -0.55 | 47 Laminin subur LAMB3       |
| 0.01  | -0.24 | 0.84  | -0.02 | 0.03  | -0.14 | 0.14  | 0.11  | -0.34 | -0.42 | -0.88 | -0.70 | 16 Laminin subur LAMC1       |
| -0.43 | -0.80 | 0.98  | 0.07  | -0.02 | 0.28  | -1.34 | -1.10 | 0.16  | 1.01  | -0.96 | -0.57 | 47 Laminin subur LAMC2       |
| -0.33 | 0.12  | -0.14 | 0.31  | -0.10 | -0.11 | -0.12 | 0.01  | 0.01  | 0.41  | -0.16 | 0.25  | 7 Lysosome-ass LAMP1         |

|       |       |       |       |       |       |       |       |       |       |       |       |                            |
|-------|-------|-------|-------|-------|-------|-------|-------|-------|-------|-------|-------|----------------------------|
| 0.09  | 0.14  | -0.51 | 0.08  | -0.20 | 0.13  | 0.64  | 0.85  | 0.13  | 0.58  | -0.03 | 0.19  | 5 Lysosome-ass LAMP2       |
| 0.33  | -0.43 | 0.22  | -0.08 | 0.28  | 0.15  | -1.03 | -1.01 | -0.24 | -0.19 | -0.29 | -0.43 | 18 Cytosol aminc LAP3      |
| 0.18  | 0.12  | 0.00  | -0.40 | 0.10  | -0.12 | 0.15  | 0.24  | -0.09 | -0.32 | -0.21 | -0.28 | 9 La-related pro LARP1     |
| 0.03  | 0.21  | -0.15 | 0.04  | -0.16 | -0.14 | 0.22  | 0.12  | -0.05 | -0.04 | -0.05 | 0.02  | 45 Leucine--tRNA LARS      |
| -0.21 | -0.55 | 0.22  | 0.03  | -0.02 | 0.11  | -0.09 | 0.00  | -0.32 | -0.20 | -0.36 | -0.27 | 14 LIM and SH3 c LASP1     |
| 0.00  | 0.27  | -0.17 | 0.13  | -0.04 | -0.27 | 0.51  | 0.60  | 0.25  | 0.11  | 0.44  | 0.40  | 29 L-lactate dehy LDHA     |
| 0.21  | 0.16  | 0.13  | 0.11  | 0.08  | 0.00  | -0.27 | -0.39 | -0.25 | -0.26 | 0.24  | 0.13  | 23 L-lactate dehy LDHB     |
| 0.39  | -0.03 | 0.95  | 0.22  | -0.21 | -0.74 | -0.52 | -0.36 | 0.15  | -0.17 | 0.39  | 0.06  | 12 Low-density li LDLR     |
| -0.11 | 0.39  | 0.17  | 0.19  | 0.20  | 0.00  | -0.04 | 0.03  | -0.13 | -0.13 | 0.05  | 0.09  | 12 LETM1 and EF LETM1      |
| 0.06  | -0.54 | 0.14  | -0.11 | 0.36  | 0.11  | -0.16 | -0.21 | 0.35  | 0.40  | -0.53 | -0.20 | 11 Galectin-1 LGALS1       |
| -0.13 | 0.02  | -0.13 | 0.11  | -0.06 | -0.19 | 0.73  | 0.96  | 0.34  | 0.08  | 0.06  | 0.27  | 9 Galectin-3 LGALS3        |
| -0.04 | -0.50 | 0.01  | -0.58 | -0.09 | 0.19  | -1.20 | -0.92 | 0.05  | 0.24  | -0.10 | -0.41 | 29 LIM domain a LIMA1      |
| 0.31  | 0.41  | 0.18  | 0.08  | -0.31 | -0.01 | 0.20  | 0.20  | -0.14 | 0.53  | -0.11 | -0.13 | 9 Protein ERGIC LMAN1      |
| 1.02  | 0.10  | 0.09  | -1.24 | -0.10 | 0.11  | -0.16 | -0.18 | -0.02 | -1.66 | 0.10  | -1.16 | 47 Prelamin-A/C; LMNA      |
| 0.47  | 0.40  | 0.32  | 0.03  | -0.07 | 0.04  | 0.15  | 0.06  | 0.32  | 0.15  | -0.01 | -0.35 | 12 Leucyl-cystiny LNPEP    |
| -0.39 | -0.23 | -0.11 | -0.20 | -0.17 | -0.38 | -0.22 | 0.06  | -0.01 | -0.08 | 0.17  | 0.35  | 16 Lon protease LONP1      |
| -0.01 | 0.17  | 0.01  | -0.40 | -0.06 | -0.21 | 0.07  | 0.03  | -0.19 | -0.58 | 0.26  | 0.10  | 67 Leucine-rich P LRPPRC   |
| -0.04 | 0.11  | -0.05 | 0.15  | -0.09 | -0.26 | 0.33  | 0.38  | 0.03  | -0.13 | -0.03 | -0.10 | 11 Leucine-rich r LRRC47   |
| 0.18  | -0.12 | -0.26 | -0.38 | 0.06  | 0.06  | -0.31 | -0.28 | 0.03  | 0.29  | -0.17 | -0.06 | 8 Leucine-rich r LRRC59    |
| -0.40 | -0.35 | 0.04  | 0.14  | -0.40 | -0.20 | -0.21 | -0.09 | 0.20  | 0.31  | 0.11  | 0.13  | 18 Leucine-rich r LRRFIP1  |
| -0.72 | -0.62 | -0.06 | -0.08 | -0.66 | -0.41 | 0.04  | 0.29  | 0.14  | 0.30  | 0.15  | 0.58  | 16 Lanosterol syr LSS      |
| 0.11  | 0.37  | -0.02 | 0.25  | 0.18  | 0.11  | 0.23  | 0.23  | 0.37  | 0.25  | 0.02  | 0.09  | 19 Leukotriene A LTA4H     |
| -0.03 | 0.13  | -0.08 | 0.36  | -0.22 | -0.13 | -0.28 | -0.13 | -0.06 | 0.21  | -0.05 | 0.12  | 6 Acyl-protein t LYPLA1    |
| -0.16 | 0.33  | -0.30 | 0.21  | 0.04  | 0.14  | -0.18 | 0.00  | -0.11 | -0.11 | -0.43 | -0.09 | 7 Acyl-protein t LYPLA2    |
| -0.20 | 0.17  | 0.01  | 0.44  | -0.19 | -0.13 | 0.26  | 0.52  | 0.12  | 0.06  | 0.22  | 0.54  | 252 MACF1                  |
| 0.22  | 0.01  | 0.85  | 0.46  | -0.23 | -0.16 | -0.10 | 0.27  | 0.24  | 0.38  | -0.05 | 0.11  | 11 Alpha-manno: MAN2A1     |
| 0.26  | 0.05  | -0.12 | 0.35  | -0.06 | -0.05 | -0.74 | -0.76 | 0.08  | 0.16  | -0.15 | 0.02  | 11 Dual specificit MAP2K1  |
| -0.16 | -0.03 | -0.07 | -0.01 | 0.01  | -0.09 | 0.02  | 0.08  | 0.02  | -0.17 | 0.04  | 0.24  | 52 Microtubule-ε MAP4      |
| 0.05  | 0.06  | -0.31 | 0.20  | 0.08  | 0.16  | -0.06 | -0.01 | -0.02 | 0.00  | 0.09  | 0.26  | 12 Mitogen-activ MAPK1     |
| 0.02  | 0.31  | 0.26  | -0.04 | 0.04  | 0.08  | -0.24 | -0.27 | -0.37 | -0.28 | -0.18 | 0.07  | 10 Mitogen-activ MAPK14    |
| 0.42  | 0.53  | -0.22 | -0.10 | 0.09  | 0.10  | 0.69  | 0.80  | 0.00  | -0.28 | -0.53 | -0.31 | 11 Microtubule-ε MAPRE1    |
| -0.41 | -0.30 | -0.05 | -0.54 | 0.20  | 0.08  | 0.19  | 0.15  | 0.07  | -0.01 | -0.40 | -0.58 | 13 Myristoylated MARCKS    |
| -0.16 | 0.12  | -0.22 | -0.11 | -0.14 | 0.01  | -0.11 | 0.11  | -0.03 | -0.03 | 0.16  | 0.23  | 19 Methionine--t MARS      |
| -0.16 | -0.22 | 0.05  | -0.23 | 0.11  | 0.02  | 0.00  | -0.06 | -0.24 | -0.44 | -0.05 | -0.11 | 15 S-adenosylme MAT2A      |
| -0.18 | -0.40 | -0.10 | -0.09 | 0.02  | 0.17  | 0.13  | 0.20  | -0.53 | -0.54 | -0.16 | -0.09 | 9 Methionine at MAT2B      |
| 0.13  | -0.24 | -0.38 | -1.50 | 0.25  | 0.34  | -0.18 | -0.28 | 0.25  | -0.53 | 0.16  | -0.63 | 13 Matrin-3 MATR3          |
| 0.01  | 0.25  | -0.30 | -0.24 | 0.11  | 0.38  | 0.54  | 0.70  | -0.19 | -0.16 | 0.17  | 0.25  | 21 DNA replicatic MCM2     |
| 0.05  | 0.07  | -0.19 | -0.28 | 0.16  | 0.24  | 0.42  | 0.62  | -0.13 | -0.13 | 0.09  | 0.32  | 28 DNA replicatic MCM3     |
| 0.10  | 0.14  | -0.28 | -0.20 | 0.41  | 0.34  | 0.70  | 0.92  | -0.15 | -0.14 | 0.17  | 0.27  | 22 DNA replicatic MCM4     |
| 0.03  | 0.20  | -0.17 | -0.23 | 0.13  | 0.14  | 0.47  | 0.73  | -0.14 | -0.09 | 0.18  | 0.28  | 16 DNA replicatic MCM5     |
| -0.04 | 0.03  | -0.23 | -0.31 | 0.11  | 0.30  | 0.60  | 0.82  | -0.28 | -0.26 | 0.09  | 0.24  | 30 DNA replicatic MCM6     |
| 0.04  | 0.07  | 0.15  | -0.14 | 0.22  | 0.36  | 0.51  | 0.61  | -0.23 | -0.18 | 0.05  | 0.29  | 22 DNA replicatic MCM7     |
| 0.01  | 0.07  | -0.04 | 0.09  | -0.11 | -0.03 | 0.09  | 0.25  | 0.04  | 0.06  | -0.26 | -0.08 | 10 Malignant T-c MCTS1     |
| 0.19  | 0.11  | -0.05 | 0.17  | 0.04  | 0.03  | -0.06 | 0.02  | -0.04 | -0.15 | 0.03  | 0.11  | 15 Malate dehyd MDH1       |
| 0.01  | 0.28  | 0.13  | 0.36  | -0.03 | -0.14 | 0.24  | 0.24  | -0.09 | -0.09 | 0.14  | 0.19  | 19 Malate dehyd MDH2       |
| 0.24  | -0.07 | 0.20  | -0.17 | 0.37  | 0.18  | 0.50  | 0.24  | -0.30 | -0.70 | 0.31  | -0.17 | 30 Midasin MDN1            |
| 0.07  | 0.14  | 0.52  | 0.24  | 0.14  | 0.42  | -0.21 | 0.01  | 0.21  | -0.08 | -0.07 | 0.22  | 6 Methionine at METAP1     |
| -0.21 | -0.07 | 0.45  | 0.60  | -0.49 | -0.26 | -0.26 | 0.13  | -0.02 | 0.22  | -0.42 | 0.25  | 13 Bifunctional p MGEA5    |
| 0.30  | 0.42  | 0.50  | 0.22  | -0.15 | -0.04 | -0.37 | -0.26 | -0.12 | -0.34 | -0.09 | -0.22 | 5 MOB kinase a MOB1A;MOB1B |
| 0.23  | 0.18  | 0.21  | 0.17  | 0.13  | -0.05 | -0.27 | -0.19 | 0.18  | -0.08 | 0.07  | 0.08  | 11 Mannosyl-olig MOGS      |

|       |       |       |       |       |       |       |       |       |       |       |       |                                       |
|-------|-------|-------|-------|-------|-------|-------|-------|-------|-------|-------|-------|---------------------------------------|
| -0.63 | -0.04 | 0.09  | -0.03 | -0.01 | -0.17 | -0.02 | 0.07  | -0.38 | -0.05 | 0.05  | 0.00  | 4 39S ribosomal MRPL37                |
| 0.14  | -0.21 | 0.14  | 0.27  | 0.06  | -0.14 | -0.07 | -0.13 | 0.05  | -0.02 | 0.08  | 0.29  | 10 28S ribosomal MRPS7                |
| 0.29  | 0.26  | -0.12 | -0.26 | -0.04 | -0.16 | 0.31  | 0.52  | -0.32 | -0.44 | 0.09  | 0.02  | 22 DNA mismatch MSH2                  |
| -0.01 | 0.01  | 0.02  | 0.24  | -0.06 | -0.07 | -0.12 | 0.06  | 0.04  | 0.09  | -0.11 | -0.08 | 63 Moesin MSN                         |
| 0.50  | -0.32 | 0.74  | -0.13 | 0.11  | 0.24  | -0.22 | -0.49 | -0.18 | -0.09 | 0.12  | -0.23 | 4 Metallothione MT2A;MT1G             |
| 0.02  | 0.07  | -0.26 | -0.29 | -0.06 | -0.06 | 0.59  | 0.61  | -0.06 | -0.25 | 0.06  | 0.14  | 50 C-1-tetrahydr MTHFD1               |
| 0.02  | 0.07  | 0.17  | 0.18  | 0.09  | -0.02 | 0.88  | 0.85  | -0.22 | -0.12 | -0.38 | 0.27  | 9 Serine/threon MTOR                  |
| -0.26 | -0.22 | 0.01  | -0.17 | 0.28  | 0.49  | -0.48 | -0.28 | -0.88 | -0.54 | -0.41 | -0.35 | 16 Methionine sy MTR                  |
| 0.46  | 0.70  | 0.17  | 0.08  | 0.09  | 0.14  | -0.22 | -0.18 | -0.22 | -0.29 | -0.24 | 0.04  | 9 Diphosphome MVD                     |
| -0.03 | -0.41 | 0.62  | 0.62  | -0.49 | -0.20 | -1.15 | -0.90 | -0.14 | 0.22  | -0.14 | 0.14  | 34 Major vault pr MVP                 |
| 0.86  | -1.22 | -0.11 | -1.03 | 1.58  | 1.04  | -4.75 | -4.85 | -1.88 | -2.08 | -0.61 | -1.56 | 38 Interferon-ind MX1                 |
| -0.20 | -0.15 | -0.20 | -1.78 | -0.06 | -0.24 | -0.16 | -0.29 | -0.11 | -0.88 | 0.37  | -0.23 | 39 Myb-binding f MYBBP1A              |
| -0.47 | -0.11 | -0.08 | -0.05 | 0.39  | 0.34  | -0.08 | -0.13 | 0.00  | -0.11 | -0.26 | -0.32 | 121 Myosin-10 MYH10                   |
| 0.14  | -0.20 | 0.11  | 0.43  | -0.16 | -0.19 | -0.87 | -1.09 | -0.01 | 0.16  | -0.01 | -0.11 | 16 Myosin-14 MYH14                    |
| 0.01  | -0.19 | 0.11  | 0.03  | 0.02  | -0.02 | -0.85 | -0.91 | 0.01  | 0.10  | -0.17 | -0.07 | 228 Myosin-9 MYH9                     |
| 0.07  | -0.38 | 0.30  | 0.02  | -0.03 | 0.02  | -0.86 | -1.06 | 0.11  | 0.18  | -0.26 | -0.26 | 10 Myosin regula MYL12A;MYL12B;MYL9   |
| -0.10 | -0.28 | 0.24  | 0.02  | 0.00  | 0.06  | -0.63 | -0.66 | 0.08  | 0.21  | -0.14 | -0.06 | 10 Myosin light p MYL6                |
| 0.09  | 0.23  | 0.27  | -0.07 | -0.01 | 0.06  | -1.21 | -1.07 | 0.54  | 0.24  | -0.01 | -0.27 | 26 Unconvention MYO18A                |
| 0.24  | -0.48 | 0.02  | -0.64 | 0.15  | 0.28  | -1.02 | -1.18 | 0.24  | -0.02 | -0.35 | -0.53 | 41 Unconvention MYO1B                 |
| -0.26 | -0.46 | -0.18 | -0.41 | -0.03 | 0.28  | -0.74 | -0.54 | -0.10 | -0.07 | -0.10 | 0.05  | 35 Unconvention MYO1C                 |
| -0.10 | 0.14  | -0.05 | 0.23  | 0.06  | 0.17  | -0.19 | -0.06 | -0.21 | -0.11 | 0.02  | 0.36  | 28 Unconvention MYO1E                 |
| 0.23  | 0.50  | 0.07  | 0.09  | 0.09  | 0.16  | -0.55 | -0.64 | 0.25  | 0.17  | 0.65  | 0.55  | 10 Unconvention MYO5A                 |
| 0.18  | 0.28  | 0.24  | 0.64  | 0.11  | 0.27  | -0.10 | 0.07  | 0.34  | 0.34  | -0.13 | 0.26  | 29 Unconvention MYO6                  |
| 0.20  | -0.02 | 0.17  | 0.06  | -1.99 | -1.88 | 0.24  | 0.31  | 0.27  | 0.34  | 0.30  | 0.40  | 72 Myoferlin MYOF                     |
| 0.16  | 0.44  | -0.28 | 0.00  | 0.17  | 0.11  | 0.11  | 0.10  | 0.00  | -0.21 | 0.18  | 0.04  | 36 N-alpha-acety NAA15                |
| 0.19  | 0.23  | 0.43  | 0.10  | 0.00  | 0.00  | -0.05 | -0.14 | -0.20 | -0.16 | 0.02  | -0.06 | 12 N-alpha-acety NAA50                |
| -0.13 | -0.13 | 0.18  | -0.25 | 0.07  | -0.09 | -0.06 | -0.18 | -0.03 | -0.47 | 0.04  | -0.03 | 6 Nascent polyp NACA                  |
| 0.14  | 0.18  | -0.22 | 0.00  | -0.24 | -0.21 | 0.08  | 0.16  | -0.01 | 0.07  | -0.10 | -0.20 | 7 Sialic acid syni NANS               |
| 0.32  | 0.16  | -0.33 | -0.34 | 0.15  | -0.09 | 0.13  | -0.13 | -0.11 | -0.24 | 0.21  | 0.04  | 9 Nucleosome a NAP1L1                 |
| -0.03 | -0.02 | 0.07  | 0.05  | 0.22  | 0.17  | 0.23  | 0.01  | -0.05 | -0.05 | -0.12 | -0.09 | 11 Nucleosome a NAP1L4                |
| -0.12 | 0.05  | 0.11  | -0.07 | -0.31 | -0.20 | -0.08 | -0.31 | 0.06  | 0.20  | -0.03 | -0.01 | 15 Asparagine--tI NARS                |
| 0.11  | 0.22  | -0.30 | -0.21 | 0.30  | 0.46  | 0.84  | 0.86  | -0.48 | -0.58 | -0.46 | -0.46 | 20 Nuclear autoa NASP                 |
| 0.11  | 0.36  | 0.21  | -0.11 | -0.21 | -0.41 | 0.14  | 0.39  | -0.18 | -0.40 | -0.30 | -0.03 | 8 Delta(24)-ster Nbla03646;DHCR24     |
| 0.06  | -0.01 | 0.18  | -0.40 | 0.24  | 0.21  | -0.05 | -0.23 | -0.16 | -0.46 | -0.15 | -0.20 | 23 Condensin cor NCAPD2               |
| -0.02 | -0.28 | 0.23  | -0.06 | 0.24  | 0.20  | -0.14 | -0.23 | -0.27 | -0.09 | 0.13  | -0.04 | 13 Condensin cor NCAPG                |
| -0.05 | 0.27  | -0.19 | -0.10 | 0.06  | 0.17  | 0.22  | 0.40  | 0.06  | 0.01  | -0.12 | 0.00  | 11 Nuclear cap-b NCBP1                |
| -0.09 | 0.08  | 0.09  | 0.22  | -0.11 | 0.10  | 0.16  | 0.34  | 0.10  | 0.02  | 0.02  | 0.42  | 27 Nck-associate NCKAP1               |
| 0.03  | -0.16 | 0.04  | -0.33 | 0.02  | -0.19 | -0.12 | -0.23 | -0.14 | -0.43 | 0.13  | -0.21 | 39 Nucleolin NCL                      |
| -0.01 | 0.19  | 0.15  | 0.03  | -0.38 | 0.03  | 0.20  | 0.32  | -0.26 | -0.37 | -0.24 | 0.30  | 8 Nicastrin NCSTN                     |
| -0.05 | 0.58  | -1.02 | -0.21 | 0.06  | -0.52 | 0.92  | 1.04  | -0.01 | 0.13  | 0.72  | 0.77  | 9 Protein NDRG NDRG1                  |
| -0.15 | -0.47 | 0.03  | 0.32  | -0.05 | -0.16 | -0.11 | 0.17  | -0.28 | -0.13 | -0.08 | 0.19  | 6 NADH dehydr NDUFA8                  |
| -0.08 | -0.08 | 0.04  | 0.26  | -0.03 | -0.03 | 0.06  | 0.18  | -0.40 | -0.23 | 0.25  | 0.29  | 5 NADH dehydr NDUFB10                 |
| -0.28 | -0.37 | 0.32  | 0.22  | -0.08 | -0.18 | -0.07 | -0.04 | -0.37 | -0.16 | 0.07  | 0.19  | 19 NADH-ubiquir NDUFS1                |
| -0.03 | 0.28  | 0.21  | 0.08  | -0.37 | -0.16 | 0.03  | 0.23  | -0.25 | -0.12 | -0.11 | 0.01  | 6 NADH dehydr NDUFS2                  |
| 0.09  | -0.12 | 0.27  | 0.03  | 0.00  | 0.18  | 0.29  | 0.46  | -0.20 | -0.04 | -0.16 | -0.06 | 5 NEDD8 NEDD8;NEDD8-MDP1              |
| 0.31  | 0.17  | 0.33  | -0.01 | 0.19  | 0.21  | -0.07 | -0.24 | -0.07 | -0.28 | -0.28 | -0.46 | 12 Nuclear expor NEMF                 |
| 0.36  | 0.41  | 0.12  | 0.32  | -0.01 | 0.00  | -0.54 | -0.44 | 0.14  | 0.10  | -0.24 | -0.07 | 10 Omega-amida NIT2                   |
| 0.16  | 0.05  | -0.06 | 0.02  | 0.06  | 0.01  | 0.02  | -0.03 | -0.10 | -0.07 | 0.07  | 0.06  | 18 Nucleoside dij NME1-NME2;NME2;NME1 |
| -0.16 | 0.02  | -0.03 | 0.12  | -0.28 | -0.16 | 0.75  | 1.13  | -0.12 | 0.09  | 0.01  | 0.10  | 12 NAD(P) transh NNT                  |
| -0.02 | -0.15 | 0.31  | 0.07  | 0.06  | 0.02  | -0.15 | -0.23 | 0.09  | 0.06  | 0.06  | -0.03 | 17 Nodal modula NOMO1                 |

|       |       |       |       |       |       |       |       |       |       |       |       |                              |          |
|-------|-------|-------|-------|-------|-------|-------|-------|-------|-------|-------|-------|------------------------------|----------|
| 0.65  | 0.03  | -0.25 | -1.11 | 0.07  | 0.39  | -0.48 | -0.50 | 0.04  | -0.56 | 0.12  | -0.88 | 17 Non-POU dom               | NONO     |
| 0.09  | -0.03 | 0.25  | -0.41 | 0.08  | 0.05  | -0.43 | -0.36 | -0.36 | -0.36 | 0.23  | -0.33 | 8 Putative ribos             | NOP2     |
| -0.41 | -0.15 | -0.13 | 0.28  | -0.14 | 0.24  | 0.99  | 1.19  | 0.19  | 0.12  | 0.33  | 0.69  | 6 Niemann-Pick               | NPC1     |
| -0.28 | -0.25 | -0.08 | 0.13  | -0.20 | -0.02 | 0.10  | 0.47  | 0.13  | 0.46  | -0.06 | -0.01 | 7 Epididymal se              | NPC2     |
| -0.14 | 0.18  | -0.16 | 0.45  | 0.09  | 0.01  | 0.17  | 0.49  | 0.25  | 0.29  | -0.15 | 0.14  | 31 Puromycin-se              | NPEPPS   |
| 0.00  | -0.08 | 0.10  | 0.12  | 0.24  | 0.15  | -0.03 | -0.04 | 0.06  | 0.01  | -0.24 | -0.20 | 5 Nuclear prote              | NPLOC4   |
| -0.13 | -0.24 | -0.10 | -0.31 | -0.06 | 0.00  | -0.01 | -0.22 | 0.10  | 0.19  | 0.10  | -0.11 | 15 Nucleophosm               | NPM1     |
| -0.44 | -0.26 | 1.67  | 1.25  | -0.23 | -0.16 | -0.31 | -0.67 | -0.15 | -0.24 | 0.35  | 0.15  | 4 Nucleoplasmii              | NPM3     |
| -0.57 | -0.53 | 0.15  | 0.70  | -1.60 | -1.37 | -1.30 | -0.71 | -0.52 | -0.26 | 0.52  | 0.97  | 10 NAD(P)H dehy              | NQO1     |
| -0.04 | 0.07  | 0.00  | 0.13  | -0.02 | 0.09  | 0.19  | 0.15  | -0.08 | -0.23 | -0.08 | -0.08 | 18 Nardilysin                | NRD1     |
| -0.07 | 0.07  | 0.06  | 0.18  | -0.36 | -0.40 | -0.57 | -0.16 | 0.06  | 0.17  | -0.11 | -0.04 | 9 Sterol-4-alpha             | NSDHL    |
| -0.11 | 0.29  | -0.18 | -0.09 | -0.07 | -0.09 | 0.97  | 1.02  | -0.28 | -0.27 | -0.15 | -0.04 | 14 NSFL1 cofacto             | NSFL1C   |
| -0.12 | -0.03 | 0.00  | -0.11 | -0.10 | -0.10 | 0.15  | 0.04  | 0.00  | 0.00  | 0.05  | 0.08  | 23 tRNA (cytosin             | NSUN2    |
| 0.20  | 0.09  | -0.06 | 0.12  | 0.05  | -0.04 | 0.12  | -0.03 | -0.16 | -0.22 | -0.02 | -0.12 | 22 Nuclear migra             | NUDC     |
| 0.14  | -0.03 | 0.06  | -0.62 | 0.01  | 0.19  | -0.24 | -0.06 | 0.10  | -0.37 | -0.91 | -1.10 | 9 Cleavage and               | NUDT21   |
| 0.04  | 0.12  | -0.04 | 0.10  | -0.10 | -0.06 | 0.11  | 0.15  | -0.20 | -0.29 | 0.03  | 0.19  | 9 ADP-sugar pyr              | NUDT5    |
| -0.50 | -0.25 | 0.05  | 0.30  | 0.17  | 0.31  | 0.09  | 0.12  | 0.31  | 0.46  | -0.30 | 0.29  | 37 Nuclear mitot             | NUMA1    |
| 0.14  | -0.01 | 0.09  | -0.06 | 0.26  | -0.10 | 0.17  | 0.09  | -0.16 | -0.24 | 0.11  | 0.11  | 10 Nuclear pore              | NUP107   |
| 0.09  | 0.18  | 0.05  | -0.23 | -0.43 | -0.17 | 0.18  | 0.08  | -0.16 | -0.39 | -0.29 | 0.02  | 15 Nuclear pore              | NUP133   |
| 0.22  | -0.06 | -0.57 | -0.64 | 0.14  | 0.18  | 0.33  | -0.01 | 0.16  | -0.55 | 0.01  | -0.31 | 8 Nuclear pore               | NUP153   |
| -0.11 | -0.18 | 0.09  | 0.08  | 0.01  | -0.14 | 0.25  | 0.33  | 0.03  | -0.09 | 0.04  | -0.12 | 19 Nuclear pore              | NUP155   |
| 0.01  | -0.25 | 0.20  | 0.11  | 0.04  | -0.10 | 0.78  | 0.05  | -0.23 | -0.21 | 0.27  | -0.06 | 10 Nuclear pore              | NUP160   |
| 0.13  | 0.16  | 0.20  | -0.03 | -0.18 | -0.14 | 0.64  | 0.39  | -0.06 | -0.44 | 0.07  | -0.30 | 8 Nucleoporin                | NUP188   |
| 0.10  | 0.16  | 0.22  | -0.10 | 0.21  | 0.01  | 0.36  | 0.26  | -0.02 | -0.40 | 0.17  | 0.03  | 28 Nuclear pore              | NUP205   |
| -0.04 | 0.02  | 0.21  | -0.14 | 0.03  | -0.32 | 0.15  | 0.04  | -0.13 | -0.24 | 0.15  | -0.01 | 25 Nuclear pore              | NUP93    |
| -0.06 | 0.01  | 0.58  | 0.51  | -0.36 | -0.02 | 0.03  | -0.22 | -0.08 | -0.22 | -0.16 | -0.17 | 7 Nucleoredoxir              | NXN      |
| 0.44  | -0.52 | -0.16 | -0.21 | 1.15  | 0.83  | -2.12 | -1.98 | -1.30 | -1.42 | 0.21  | -0.07 | 32 2-5-oligoaden             | OAS3     |
| 0.57  | 0.40  | 0.55  | 0.25  | -0.11 | -0.22 | 0.05  | -0.02 | -0.21 | -0.03 | 0.01  | -0.04 | 18 Ornithine ami             | OAT      |
| 0.27  | 0.47  | -0.01 | 0.19  | -0.04 | 0.11  | -0.02 | -0.04 | 0.04  | 0.05  | 0.18  | 0.22  | 16 Obg-like ATPa             | OLA1     |
| 0.01  | 0.32  | 0.13  | 0.32  | -0.19 | 0.16  | 0.14  | 0.28  | 0.10  | -0.17 | 0.02  | -0.01 | 7 Dynamin-like               | OPA1     |
| -0.13 | -0.08 | -0.10 | -0.05 | 0.08  | 0.37  | 0.11  | 0.30  | -0.02 | 0.19  | -0.09 | 0.28  | 6 Osteoclast-sti             | OSTF1    |
| 0.11  | 0.08  | 0.14  | 0.10  | -0.04 | -0.08 | -0.06 | -0.03 | -0.15 | -0.18 | -0.04 | -0.05 | 10 Ubiquitin thio            | OTUB1    |
| -0.32 | -0.17 | 0.12  | 0.56  | -0.16 | -0.01 | 0.46  | 0.39  | -0.09 | 0.05  | -0.20 | 0.16  | 7 Serine/threon              | OXSRL1   |
| 0.01  | -0.23 | -0.02 | -0.24 | -0.12 | -0.17 | -0.39 | -0.33 | 0.15  | 0.23  | -0.21 | -0.18 | 31 Protein disulfi           | P4HB     |
| 0.05  | 0.24  | 0.08  | 0.04  | -0.17 | -0.17 | 0.12  | 0.05  | -0.08 | -0.13 | 0.04  | -0.03 | 25 Proliferation- $\epsilon$ | PA2G4    |
| -0.02 | -0.14 | -0.15 | -0.27 | 0.22  | 0.10  | -0.06 | -0.08 | 0.02  | -0.18 | 0.04  | -0.10 | 33 Polyadenylate             | PABPC1   |
| -0.04 | 0.18  | 0.06  | -0.01 | 0.23  | 0.02  | 0.28  | 0.09  | -0.02 | -0.10 | -0.19 | -0.27 | 22 Polyadenylate             | PABPC4   |
| -0.12 | -0.15 | -0.02 | 0.14  | 0.08  | 0.11  | 0.07  | 0.19  | 0.14  | 0.24  | 0.04  | 0.18  | 15 Platelet-activ $\epsilon$ | PAFAH1B1 |
| -0.16 | -0.13 | -0.72 | 0.01  | 0.07  | 0.15  | -0.17 | 0.09  | -0.21 | -0.04 | 0.00  | -0.15 | 8 Platelet-activ $\epsilon$  | PAFAH1B2 |
| 0.26  | 0.15  | -0.31 | -0.28 | 0.16  | 0.17  | 0.26  | 0.20  | -0.10 | -0.23 | -0.37 | -0.23 | 10 Platelet-activ $\epsilon$ | PAFAH1B3 |
| 0.12  | 0.19  | 0.16  | 0.11  | -0.09 | -0.07 | 0.09  | -0.08 | -0.19 | -0.19 | 0.02  | -0.05 | 22 Multifunction             | PAICS    |
| 0.06  | -0.03 | -0.05 | -0.04 | 0.04  | 0.21  | -0.18 | -0.06 | -0.15 | 0.09  | -0.16 | 0.01  | 9 Serine/threon              | PAK2     |
| -0.32 | -0.44 | 0.34  | 0.04  | 0.48  | 0.53  | -0.76 | -0.89 | 0.01  | 0.11  | 0.10  | -0.05 | 20 Palladin                  | PALLD    |
| 0.11  | -0.10 | -0.06 | -0.13 | 0.31  | 0.52  | -0.16 | -0.06 | 0.12  | -0.04 | 0.47  | 0.17  | 10 Bifunctional 3            | PAPSS1   |
| 0.12  | 0.02  | -0.04 | -0.03 | -0.02 | -0.01 | 0.37  | 0.24  | -0.09 | -0.17 | -0.01 | -0.08 | 20 Protein DJ-1              | PARK7    |
| 0.22  | 0.05  | -0.18 | -1.13 | 0.20  | 0.19  | 0.01  | -0.04 | -0.26 | -0.62 | 0.38  | 0.19  | 30 Poly [ADP-rib $\epsilon$  | PARP1    |
| 0.59  | -0.70 | 1.14  | 0.00  | 1.10  | 0.67  | 1.15  | -1.96 | -0.62 | -0.55 | -0.62 | -0.88 | 12 Poly [ADP-rib $\epsilon$  | PARP14   |
| -0.03 | 0.06  | 0.02  | 0.17  | 0.22  | -0.11 | -0.33 | -0.29 | -0.29 | -0.57 | 0.05  | -0.01 | 8 Protein PBDC:              | PBDC1    |
| 0.16  | 0.11  | -0.21 | -0.25 | 0.10  | 0.25  | -0.21 | 0.03  | 0.31  | 0.47  | -0.22 | -0.36 | 18 Pyruvate carb             | PC       |
| -0.06 | -0.09 | 0.16  | 0.15  | 0.01  | -0.14 | -0.02 | -0.10 | 0.02  | -0.21 | 0.02  | -0.06 | 12 Poly(rC)-bindi            | PCBP1    |

|       |       |       |       |       |       |       |       |       |       |       |       |                    |         |
|-------|-------|-------|-------|-------|-------|-------|-------|-------|-------|-------|-------|--------------------|---------|
| -0.10 | -0.26 | 0.25  | 0.03  | 0.07  | 0.05  | -0.10 | -0.30 | -0.16 | -0.16 | -0.05 | -0.27 | 11 Poly(rC)-bindi  | PCBP2   |
| 0.10  | 0.13  | -0.20 | -0.06 | 0.03  | 0.15  | 0.25  | 0.32  | -0.05 | 0.08  | -0.10 | 0.05  | 11 Protein-L-isoa  | PCMT1   |
| 0.04  | 0.33  | -0.19 | -0.30 | 0.08  | 0.09  | 0.73  | 0.81  | -0.37 | -0.22 | -0.26 | -0.19 | 15 Proliferating c | PCNA    |
| 0.17  | 0.04  | -0.07 | -0.03 | 0.08  | 0.03  | -0.23 | 0.14  | -0.11 | -0.07 | -0.06 | -0.08 | 7 PEST proteoly    | PCNP    |
| 0.16  | 0.12  | 0.08  | 0.02  | -0.04 | 0.23  | -0.29 | -0.19 | 0.26  | 0.44  | -0.09 | 0.09  | 7 Programmed i     | PDCD10  |
| -0.05 | 0.24  | -0.01 | 0.42  | -0.10 | -0.18 | 0.12  | 0.26  | 0.16  | 0.11  | 0.19  | 0.46  | 42 Programmed i    | PDCD6IP |
| -0.24 | 0.02  | -0.23 | -0.05 | 0.10  | -0.04 | 0.02  | 0.23  | -0.22 | -0.16 | 0.13  | 0.19  | 6 Pyruvate dehy    | PDHA1   |
| -0.13 | -0.41 | 0.14  | -0.23 | -0.27 | -0.28 | -0.58 | -0.49 | -0.06 | 0.14  | -0.32 | -0.29 | 36 Protein disulfi | PDIA3   |
| 0.10  | -0.40 | 0.15  | -0.28 | -0.12 | -0.24 | -0.83 | -0.68 | -0.17 | -0.10 | -0.42 | -0.53 | 39 Protein disulfi | PDIA4   |
| 0.14  | -0.21 | 0.01  | -0.29 | -0.30 | -0.37 | -0.65 | -0.50 | 0.05  | 0.20  | -0.40 | -0.28 | 17 Protein disulfi | PDIA6   |
| -0.12 | -0.70 | -0.50 | -0.66 | -0.19 | -0.22 | -0.15 | 0.14  | 0.16  | -0.04 | -0.32 | 0.00  | 17 PDZ and LIM c   | PDLIM1  |
| -0.55 | -0.27 | -0.05 | 0.09  | -0.19 | 0.00  | -0.22 | 0.05  | -0.34 | -0.28 | -0.15 | 0.32  | 18 PDZ and LIM c   | PDLIM5  |
| -0.71 | -1.09 | -0.10 | -0.76 | -0.04 | 0.26  | -0.45 | -0.97 | 0.23  | 0.35  | -0.67 | -0.40 | 10 PDZ and LIM c   | PDLIM7  |
| 0.12  | 0.26  | 0.17  | -0.54 | 0.16  | 0.13  | 0.29  | 0.30  | -0.08 | -0.37 | -0.04 | -0.18 | 24 Sister chroma   | PDS5A   |
| -0.02 | -0.10 | -0.24 | -0.55 | 0.15  | 0.24  | 0.12  | 0.46  | 0.05  | -0.02 | 0.18  | 0.10  | 9 Sister chroma    | PDS5B   |
| 0.06  | 0.17  | -0.08 | 0.23  | -0.08 | -0.02 | -0.25 | -0.21 | 0.09  | 0.06  | -0.46 | -0.31 | 8 Pyridoxal kina   | PDXK    |
| -0.02 | -0.02 | 0.04  | 0.02  | -0.06 | -0.19 | 0.31  | 0.14  | -0.01 | -0.17 | 0.17  | 0.12  | 12 Phosphatidyle   | PEBP1   |
| 0.08  | -0.05 | 0.01  | -0.28 | 0.04  | -0.02 | 0.00  | -0.23 | -0.22 | -0.54 | -0.16 | -0.39 | 10 Proline-, gluta | PELP1   |
| -0.14 | -0.19 | -0.08 | 0.06  | -0.11 | -0.18 | 0.28  | 0.02  | -0.16 | -0.27 | 0.07  | -0.03 | 19 Phosphoribos    | PFAS    |
| -0.04 | 0.20  | -0.07 | 0.21  | 0.09  | 0.04  | -0.09 | 0.08  | -0.04 | -0.04 | 0.33  | 0.05  | 14 6-phosphofru    | PFKL    |
| 0.39  | 0.54  | 0.00  | 0.17  | 0.08  | -0.01 | 0.24  | 0.38  | -0.08 | -0.42 | 0.29  | 0.34  | 16 6-phosphofru    | PFKM    |
| 0.12  | 0.11  | -0.10 | 0.16  | -0.18 | -0.06 | 0.09  | 0.16  | 0.24  | 0.35  | 0.09  | 0.26  | 31 6-phosphofru    | PFKP    |
| -0.18 | -0.38 | 0.17  | 0.02  | 0.06  | 0.12  | -0.33 | -0.21 | -0.03 | 0.01  | -0.08 | -0.05 | 17 Profilin-1      | PFN1    |
| 0.04  | 0.08  | 0.11  | 0.15  | 0.13  | -0.01 | 0.07  | 0.09  | 0.07  | 0.02  | -0.01 | 0.04  | 19 Phosphoglyce    | PGAM1   |
| 0.33  | 0.40  | -0.21 | -0.21 | 0.15  | 0.12  | 0.26  | 0.25  | -0.23 | -0.24 | 0.24  | 0.31  | 19 6-phosphoglu    | PGD     |
| -0.01 | 0.12  | -0.16 | 0.06  | -0.11 | -0.15 | 0.22  | 0.32  | -0.04 | -0.04 | 0.05  | 0.18  | 32 Phosphoglyce    | PGK1    |
| -0.38 | -0.40 | -0.08 | 0.16  | 0.23  | 0.15  | -0.47 | -0.41 | 0.17  | 0.01  | -0.33 | -0.21 | 8 6-phosphoglu     | PGLS    |
| 0.26  | -0.11 | 0.07  | -0.23 | 0.05  | 0.14  | 0.04  | -0.14 | -0.27 | -0.28 | -0.12 | 0.01  | 20 Phosphogluco    | PGM1    |
| -0.17 | -0.35 | -0.26 | -0.08 | -0.12 | 0.02  | 0.10  | 0.09  | -0.31 | -0.15 | -0.01 | -0.08 | 12 Membrane-as     | PGRMC1  |
| 0.12  | 0.15  | 0.17  | 0.31  | -0.20 | -0.12 | 0.11  | 0.15  | -0.18 | 0.09  | -0.22 | -0.15 | 5 Membrane-as      | PGRMC2  |
| -0.01 | 0.04  | -0.11 | 0.13  | -0.04 | -0.05 | 0.08  | 0.12  | -0.12 | -0.14 | -0.08 | -0.06 | 17 Prohibitin      | PHB     |
| 0.00  | 0.15  | 0.04  | 0.17  | -0.07 | -0.12 | 0.06  | 0.17  | -0.21 | -0.06 | 0.08  | 0.11  | 18 Prohibitin-2    | PHB2    |
| -0.10 | -0.02 | -0.13 | 0.16  | -0.96 | -0.78 | -0.08 | 0.23  | -0.02 | 0.37  | -0.20 | 0.24  | 22 D-3-phosphog    | PHGDH   |
| 0.00  | 0.17  | 0.11  | 0.00  | 0.17  | 0.22  | -0.09 | -0.33 | 0.00  | 0.18  | -0.18 | -0.24 | 4 Phosphatidyl     | PICALM  |
| -0.06 | 0.10  | -0.07 | 0.13  | 0.07  | 0.07  | -0.53 | -0.56 | -0.04 | 0.08  | 0.05  | 0.02  | 10 Phosphatidyl    | PITPNB  |
| -0.03 | 0.23  | -0.17 | 0.23  | -0.33 | -0.24 | 0.52  | 0.40  | -0.65 | -0.62 | 0.08  | 0.27  | 18 Presequence     | PITRM1  |
| 0.22  | 0.20  | -0.13 | -0.09 | -0.01 | -0.09 | -0.28 | -0.20 | -0.15 | -0.17 | 0.08  | 0.03  | 51 Pyruvate kina   | PKM     |
| -0.28 | 0.14  | -0.03 | 0.02  | 0.18  | 0.00  | 0.52  | 0.66  | 0.59  | 0.50  | 0.00  | -0.09 | 16 Plakophilin-3   | PKP3    |
| -0.23 | -0.10 | -0.16 | -0.02 | -0.07 | 0.07  | -0.02 | 0.09  | -0.26 | -0.11 | -0.13 | 0.04  | 29 1-phosphatid    | PLCB3   |
| 1.63  | -0.03 | 0.11  | -1.36 | -0.08 | 0.29  | -1.37 | -1.43 | -1.49 | -2.27 | 0.49  | -1.86 | 258 Plectin        | PLEC    |
| 0.00  | -0.02 | 0.06  | 0.18  | 0.30  | 0.56  | -0.37 | -0.21 | -0.12 | -0.05 | -0.11 | 0.10  | 14 Perilipin-3     | PLIN3   |
| -0.27 | -0.33 | -0.29 | 0.05  | -0.10 | -0.06 | -0.38 | -0.25 | -0.12 | 0.03  | 0.26  | 0.40  | 28 Plastin-3       | PLS3    |
| -0.45 | 0.11  | -0.19 | 0.30  | -0.14 | 0.49  | -0.28 | 0.31  | -0.01 | 0.50  | 0.01  | 0.25  | 8 Phosphomeva      | PMVK    |
| -0.22 | 0.09  | -0.09 | 0.24  | -0.14 | -0.16 | -0.03 | 0.06  | -0.35 | -0.31 | -0.06 | 0.05  | 16 Purine nucleo   | PNP     |
| 0.17  | 0.17  | 0.00  | -0.13 | 0.19  | 0.13  | 0.06  | 0.00  | -0.24 | -0.09 | -0.35 | -0.09 | 14 DNA polymer     | POLD1   |
| -0.04 | -0.20 | 0.42  | 0.01  | -0.05 | 0.05  | -0.13 | -0.08 | -0.15 | -0.17 | 0.08  | 0.01  | 18 DNA-directed    | POLR2B  |
| 0.10  | -0.31 | 0.02  | -0.52 | 0.19  | 0.28  | 0.05  | -0.20 | 0.03  | -0.47 | 0.32  | -0.32 | 10 Ribonucleas     | POP1    |
| 0.15  | 0.45  | -0.10 | 0.06  | 0.08  | 0.10  | 0.12  | 0.17  | -0.17 | -0.54 | -0.02 | 0.06  | 16 Inorganic pyrc  | PPA1    |
| 0.40  | 0.16  | 0.14  | 0.00  | 0.10  | 0.15  | 0.27  | -0.04 | -0.08 | -0.16 | 0.00  | -0.20 | 9 Amidophosph      | PPAT    |
| -0.72 | 7.63  | 1.11  | 4.22  | 0.78  | 5.75  | -0.07 | 5.96  | 1.04  | 6.45  | -4.13 | -2.43 | 1 Liprin-alpha-4   | PPFIA4  |

|       |       |       |       |       |       |       |       |       |       |       |       |                               |
|-------|-------|-------|-------|-------|-------|-------|-------|-------|-------|-------|-------|-------------------------------|
| -0.10 | -0.04 | -0.05 | 0.07  | 0.06  | 0.07  | 0.18  | 0.25  | 0.00  | 0.00  | 0.09  | 0.13  | 14 Peptidyl-proly PPIA        |
| 0.04  | -0.31 | -0.08 | -0.26 | -0.20 | -0.18 | -0.69 | -0.61 | 0.02  | 0.27  | -0.32 | -0.20 | 21 Peptidyl-proly PPIB        |
| 0.22  | 0.17  | -0.34 | -0.18 | 0.00  | 0.08  | 0.30  | 0.30  | -0.17 | -0.42 | -0.22 | -0.23 | 6 Peptidyl-proly PPIH         |
| 0.10  | 0.01  | 0.32  | 0.08  | 0.08  | 0.19  | 0.06  | 0.00  | 0.11  | 0.22  | -0.05 | -0.02 | 16 Serine/threon PPP1CA       |
| -0.04 | 0.08  | 0.31  | 0.26  | -0.20 | 0.01  | -0.14 | 0.08  | -0.01 | -0.09 | 0.00  | 0.21  | 15 Serine/threon PPP1CB       |
| 0.41  | 0.04  | 0.19  | -0.23 | 0.51  | 0.48  | -0.43 | -0.38 | -0.10 | -0.13 | -0.14 | -0.43 | 9 Protein phosp PPP1R12A      |
| -0.15 | -0.02 | -0.08 | 0.04  | 0.01  | 0.02  | 0.19  | 0.15  | 0.10  | 0.07  | -0.03 | 0.00  | 25 Serine/threon PPP2R1A      |
| -0.27 | 0.13  | -0.38 | -0.08 | 0.19  | 0.07  | 0.06  | 0.14  | 0.11  | 0.08  | -0.13 | 0.23  | 8 Serine/threon PPP2R2A       |
| -0.02 | -0.24 | 0.27  | 0.06  | 0.07  | 0.02  | -0.72 | -0.65 | 0.11  | 0.11  | -0.19 | -0.24 | 6 Serine/threon PPP3CA;PPP3CB |
| -0.11 | 0.12  | 0.45  | -0.06 | 0.00  | 0.00  | 0.06  | -0.32 | 0.04  | -0.39 | 0.23  | 0.00  | 10 Serine/threon PPP6R3       |
| -0.16 | -0.06 | -0.06 | 0.17  | -0.20 | -0.17 | 0.24  | 0.34  | -0.02 | 0.06  | 0.08  | 0.20  | 26 Peroxiredoxin PRDX1        |
| 0.13  | 0.12  | -0.16 | 0.08  | 0.12  | -0.09 | 0.63  | 0.50  | 0.25  | 0.03  | 0.21  | 0.14  | 14 Peroxiredoxin PRDX2        |
| 0.08  | -0.18 | 0.15  | 0.25  | 0.13  | 0.15  | -0.17 | -0.23 | -0.36 | -0.17 | -0.03 | -0.23 | 8 Thioredoxin-d PRDX3         |
| -0.12 | -0.03 | -0.02 | -0.04 | -0.03 | 0.08  | 0.07  | 0.17  | -0.27 | 0.01  | -0.24 | -0.20 | 10 Peroxiredoxin PRDX4        |
| 0.06  | 0.09  | 0.09  | 0.24  | -0.05 | -0.09 | 0.21  | 0.23  | -0.12 | -0.25 | 0.00  | 0.07  | 18 Peroxiredoxin PRDX6        |
| 0.40  | 0.29  | -0.04 | -0.01 | 0.06  | -0.02 | -0.04 | 0.17  | 0.22  | 0.00  | -0.08 | 0.06  | 21 Prolyl endope PREP         |
| 0.05  | 0.01  | -0.12 | -0.09 | -0.20 | -0.09 | 0.15  | 0.39  | -0.24 | 0.01  | -0.20 | 0.00  | 18 Glucosidase 2 PRKCSH       |
| 0.07  | 0.14  | -0.21 | -0.12 | 0.04  | -0.05 | 0.32  | 0.37  | -0.13 | -0.22 | 0.04  | 0.06  | 207 DNA-depende PRKDC         |
| -0.10 | -0.21 | 0.00  | -0.15 | 0.08  | 0.06  | 0.10  | -0.12 | -0.16 | -0.14 | 0.01  | 0.00  | 16 Protein arginii PRMT1      |
| 0.38  | 0.39  | -0.25 | 0.14  | -0.33 | -0.37 | 0.45  | 0.36  | -0.31 | -0.30 | 0.01  | 0.04  | 13 Protein arginii PRMT5      |
| 0.12  | 0.09  | -0.48 | -0.75 | -0.01 | -0.08 | 0.54  | 0.31  | -0.25 | -0.40 | 0.00  | -0.25 | 6 Pre-mRNA-prc PRPF19         |
| 0.24  | -0.01 | 0.03  | -0.50 | 0.14  | -0.02 | 0.26  | 0.04  | 0.30  | -0.52 | 0.15  | -0.30 | 35 Pre-mRNA-prc PRPF8         |
| 0.20  | 0.36  | 0.01  | 0.17  | 0.10  | 0.27  | 0.18  | 0.37  | -0.38 | -0.22 | -0.11 | -0.13 | 9 Ribose-phospl PRPS1         |
| 0.05  | 0.13  | 0.21  | -0.28 | 0.01  | -0.12 | 0.07  | -0.17 | 0.10  | -0.57 | -0.06 | -0.24 | 13 Protein PRC2 PRRC2C        |
| -0.35 | -0.28 | -0.22 | -0.09 | -0.96 | -0.31 | -1.31 | -0.65 | 0.13  | 0.73  | -0.16 | 0.34  | 18 Phosphoserin PSAT1         |
| 0.04  | 0.15  | -0.04 | 0.01  | 0.11  | 0.13  | 0.07  | 0.08  | -0.11 | 0.12  | -0.20 | -0.09 | 22 Proteasome si PSMA1        |
| 0.11  | 0.11  | 0.15  | 0.18  | 0.13  | 0.12  | 0.21  | 0.22  | 0.01  | 0.08  | -0.07 | -0.07 | 12 Proteasome si PSMA2        |
| 0.28  | 0.22  | -0.10 | 0.16  | 0.12  | 0.22  | 0.06  | 0.09  | 0.04  | 0.11  | -0.09 | -0.06 | 11 Proteasome si PSMA3        |
| 0.25  | 0.28  | -0.01 | 0.06  | 0.07  | 0.17  | 0.10  | 0.10  | -0.25 | -0.14 | 0.03  | -0.02 | 11 Proteasome si PSMA4        |
| 0.03  | 0.05  | -0.06 | 0.09  | 0.10  | 0.08  | 0.10  | 0.12  | -0.10 | 0.00  | -0.13 | -0.12 | 7 Proteasome si PSMA5         |
| 0.02  | 0.18  | -0.02 | 0.11  | 0.12  | 0.18  | 0.30  | 0.28  | -0.02 | 0.10  | -0.11 | -0.08 | 11 Proteasome si PSMA6        |
| 0.01  | 0.15  | -0.17 | -0.01 | 0.11  | 0.07  | 0.29  | 0.26  | -0.05 | 0.08  | -0.06 | -0.14 | 15 Proteasome si PSMA7        |
| 0.07  | 0.12  | -0.01 | 0.18  | 0.12  | 0.12  | 0.27  | 0.27  | 0.04  | 0.12  | -0.15 | -0.06 | 13 Proteasome si PSMB1        |
| 0.07  | 0.21  | 0.01  | 0.07  | 0.05  | 0.12  | 0.12  | 0.29  | -0.15 | -0.14 | -0.29 | -0.13 | 12 Proteasome si PSMB2        |
| 0.12  | 0.13  | 0.00  | 0.12  | 0.03  | 0.23  | 0.16  | 0.24  | -0.03 | 0.07  | -0.12 | -0.11 | 7 Proteasome si PSMB3         |
| 0.13  | 0.08  | 0.20  | 0.22  | 0.04  | 0.03  | 0.14  | 0.16  | 0.05  | 0.14  | -0.26 | -0.14 | 8 Proteasome si PSMB4         |
| -0.04 | 0.19  | -0.13 | 0.11  | 0.00  | 0.10  | 0.53  | 0.53  | 0.09  | 0.17  | -0.10 | 0.02  | 12 Proteasome si PSMB5        |
| -0.13 | 0.10  | -0.08 | 0.18  | -0.07 | -0.04 | 0.41  | 0.45  | 0.14  | 0.24  | 0.01  | 0.12  | 5 Proteasome si PSMB6         |
| 0.10  | 0.28  | -0.13 | 0.10  | 0.02  | 0.10  | 0.19  | 0.24  | -0.08 | 0.12  | -0.10 | 0.07  | 8 Proteasome si PSMB7         |
| -0.02 | 0.03  | -0.19 | 0.06  | 0.11  | 0.37  | -0.23 | 0.00  | 0.03  | 0.05  | -0.20 | 0.00  | 12 26S protease PSMC1         |
| 0.08  | 0.06  | -0.41 | 0.06  | 0.03  | 0.18  | 0.00  | 0.01  | -0.03 | -0.09 | -0.15 | -0.05 | 24 26S protease PSMC2         |
| -0.06 | 0.00  | 0.19  | 0.16  | -0.06 | 0.03  | 0.21  | 0.24  | 0.00  | 0.04  | -0.04 | -0.03 | 16 26S protease PSMC3         |
| 0.02  | 0.16  | -0.42 | -0.01 | 0.12  | 0.11  | -0.11 | 0.00  | -0.03 | 0.06  | -0.09 | 0.08  | 18 26S protease PSMC4         |
| -0.06 | 0.09  | -0.05 | 0.09  | -0.04 | 0.20  | -0.01 | -0.11 | 0.04  | 0.01  | 0.03  | 0.06  | 16 26S protease PSMC5         |
| 0.06  | 0.15  | 0.13  | 0.14  | -0.01 | 0.05  | 0.11  | 0.26  | -0.01 | -0.03 | -0.05 | 0.00  | 18 26S protease PSMC6         |
| -0.10 | 0.07  | -0.06 | 0.08  | 0.10  | 0.16  | 0.09  | 0.04  | 0.01  | 0.08  | 0.00  | 0.11  | 39 26S proteasor PSMD1        |
| 0.02  | 0.09  | -0.14 | -0.02 | 0.11  | 0.20  | -0.09 | -0.01 | -0.06 | 0.00  | 0.01  | 0.14  | 19 26S proteasor PSMD11       |
| 0.03  | 0.09  | 0.01  | 0.06  | -0.01 | 0.13  | 0.09  | 0.06  | 0.03  | 0.00  | 0.07  | 0.15  | 17 26S proteasor PSMD12       |
| 0.00  | 0.11  | -0.09 | -0.02 | 0.06  | 0.27  | -0.05 | -0.12 | -0.04 | 0.06  | 0.08  | 0.14  | 20 26S proteasor PSMD13       |
| 0.01  | 0.20  | -0.04 | 0.15  | -0.10 | 0.12  | -0.19 | -0.13 | -0.13 | -0.03 | -0.07 | 0.02  | 7 26S proteasor PSMD14        |

|       |       |       |       |       |       |       |       |       |       |       |       |                           |
|-------|-------|-------|-------|-------|-------|-------|-------|-------|-------|-------|-------|---------------------------|
| 0.01  | -0.03 | 0.14  | 0.05  | 0.01  | 0.10  | -0.22 | -0.23 | -0.13 | -0.06 | -0.10 | -0.10 | 40 26S proteasor PSMD2    |
| -0.05 | 0.01  | -0.09 | 0.05  | 0.11  | 0.11  | -0.11 | -0.06 | 0.03  | -0.02 | 0.14  | 0.15  | 24 26S proteasor PSMD3    |
| 0.04  | 0.10  | 0.11  | 0.25  | 0.06  | 0.15  | 0.06  | 0.16  | 0.05  | 0.14  | 0.01  | 0.02  | 11 26S proteasor PSMD4    |
| -0.20 | -0.29 | -0.07 | -0.05 | 0.17  | 0.13  | 0.46  | 0.44  | -0.01 | -0.18 | -0.20 | 0.07  | 9 26S proteasor PSMD5     |
| -0.11 | -0.03 | -0.24 | 0.15  | 0.11  | 0.22  | 0.00  | 0.01  | 0.07  | 0.00  | 0.01  | 0.09  | 21 26S proteasor PSMD6    |
| 0.05  | 0.21  | -0.16 | 0.06  | 0.16  | 0.23  | -0.07 | 0.00  | -0.11 | -0.05 | 0.18  | 0.25  | 10 26S proteasor PSMD7    |
| -0.02 | 0.19  | 0.29  | 0.20  | -0.02 | 0.03  | -0.01 | 0.02  | -0.08 | -0.02 | 0.04  | 0.12  | 9 26S proteasor PSMD8     |
| 0.23  | -0.08 | 0.08  | -0.02 | 0.51  | 0.38  | -0.26 | -0.19 | -0.23 | -0.23 | -0.23 | -0.38 | 13 Proteasome a PSME1     |
| 0.27  | -0.15 | 0.18  | 0.01  | 0.47  | 0.32  | -0.42 | -0.51 | -0.22 | -0.19 | -0.13 | -0.50 | 13 Proteasome a PSME2     |
| -0.10 | -0.22 | -0.41 | 0.08  | -0.66 | -0.12 | -1.66 | -1.48 | 0.03  | 0.56  | -0.73 | -0.05 | 5 Phosphoserin PSPH       |
| 0.04  | -0.04 | -0.11 | -0.18 | 0.13  | 0.12  | 0.08  | 0.07  | 0.02  | -0.10 | 0.00  | 0.04  | 16 Polypyrimidin PTBP1    |
| -0.29 | -0.14 | 0.21  | -0.17 | 0.02  | -0.04 | 0.12  | 0.06  | -0.23 | -0.75 | 0.05  | -0.14 | 7 Prothymosin PTMA        |
| 0.03  | -0.17 | -0.20 | -0.13 | 0.27  | 0.04  | 0.45  | -0.20 | -0.20 | -0.58 | 0.24  | -0.10 | 3 Parathymosin PTMS       |
| -0.05 | 0.26  | 0.07  | 0.37  | -1.60 | -1.89 | 1.07  | 1.13  | 0.14  | 0.18  | 0.47  | 0.58  | 2 Very-long-cha PTPLB     |
| 0.37  | 0.36  | 0.00  | 0.02  | -0.12 | -0.09 | 0.91  | 0.96  | -0.38 | -0.11 | -0.45 | -0.31 | 11 Tyrosine-protr PTPN1   |
| -0.02 | -0.40 | 0.16  | -0.41 | 0.07  | 0.04  | 0.31  | 0.13  | -0.20 | -0.12 | -0.01 | -0.11 | 14 Polymerase I PTRF      |
| -0.08 | -0.67 | 0.48  | -0.04 | 0.09  | 0.13  | -0.33 | -0.33 | -0.08 | -0.23 | -0.03 | -0.28 | 8 Paxillin PXN            |
| 0.57  | 0.76  | -0.34 | 0.05  | -0.12 | -0.11 | -1.07 | 0.40  | -0.07 | 0.08  | 0.35  | 0.60  | 7 Apoptosis-ass PYCARD    |
| 0.30  | 0.35  | -0.51 | -0.20 | -0.06 | -0.21 | 0.56  | 0.62  | 0.26  | 0.32  | 0.32  | 0.34  | 54 Glycogen pho PYGB      |
| -0.19 | -0.23 | 0.26  | 0.43  | 0.27  | 0.37  | -0.35 | -0.22 | 0.13  | 0.16  | -0.72 | -0.68 | 54 Glycogen pho PYGL      |
| -0.16 | -0.12 | -0.14 | 0.11  | -0.04 | 0.07  | -0.05 | 0.11  | 0.02  | 0.02  | -0.05 | 0.11  | 33 Glutamine--tr QARS     |
| -0.41 | -0.63 | 0.25  | -0.12 | 0.28  | 0.22  | 0.02  | -0.01 | 0.13  | 0.14  | -0.20 | -0.29 | 7 Dihydropterid QDPR      |
| -0.08 | 0.43  | 0.08  | 0.54  | 0.13  | 0.04  | -0.01 | 0.19  | 0.29  | 0.29  | 0.01  | 0.20  | 10 Ras-related pr RAB10   |
| 0.02  | 0.07  | 0.27  | 0.42  | -0.04 | -0.03 | -0.32 | -0.12 | 0.14  | 0.17  | 0.02  | 0.13  | 11 Ras-related pr RAB11B  |
| 0.46  | 0.19  | 0.52  | 0.17  | 0.47  | 0.58  | 0.11  | 0.06  | -0.01 | -0.07 | -0.10 | -0.11 | 5 Ras-related pr RAB13    |
| 0.10  | 0.20  | 0.04  | 0.29  | 0.11  | 0.09  | 0.41  | 0.39  | 0.02  | 0.13  | -0.09 | -0.02 | 15 Ras-related pr RAB14   |
| -0.13 | 0.08  | 0.03  | 0.23  | 0.00  | 0.06  | -0.07 | 0.03  | 0.25  | 0.34  | -0.08 | 0.20  | 12 Ras-related pr RAB18   |
| 0.03  | 0.01  | 0.00  | 0.25  | -0.07 | 0.00  | -0.01 | 0.10  | 0.03  | 0.27  | -0.03 | 0.11  | 17 Ras-related pr RAB1A   |
| 0.02  | 0.01  | -0.47 | 0.09  | -0.03 | 0.03  | 0.30  | 0.38  | 0.11  | 0.15  | 0.09  | 0.18  | 13 Ras-related pr RAB1B   |
| 0.13  | 0.10  | 0.20  | 0.28  | 0.04  | 0.02  | 0.31  | 0.39  | -0.96 | -0.65 | 0.02  | 0.18  | 7 Ras-related pr RAB21    |
| 0.30  | 0.31  | 0.18  | 0.22  | -0.06 | -0.11 | 0.13  | 0.13  | -0.06 | 0.06  | -0.11 | 0.06  | 11 Ras-related pr RAB2A   |
| -0.19 | -0.60 | 0.11  | -0.17 | -0.13 | 0.09  | 0.16  | 0.05  | -0.38 | 0.10  | -0.26 | 0.13  | 9 Ras-related pr RAB32    |
| 0.17  | 0.11  | 0.11  | 0.13  | 0.12  | -0.01 | -0.44 | -0.44 | -0.14 | -0.17 | -0.01 | -0.05 | 19 Rab3 GTPase- RAB3GAP1  |
| 0.01  | -0.04 | 0.01  | 0.04  | 0.11  | 0.13  | -0.42 | -0.34 | -0.13 | -0.12 | -0.02 | 0.01  | 14 Rab3 GTPase- RAB3GAP2  |
| -0.02 | -0.21 | 0.70  | 0.22  | 1.00  | 0.25  | -0.07 | -0.07 | 0.37  | 0.37  | 0.25  | 0.00  | 5 Ras-related pr RAB5A    |
| 0.15  | 0.21  | 0.41  | 0.41  | 0.03  | 0.11  | 0.08  | -0.02 | 0.14  | 0.36  | 0.20  | -0.34 | 7 Ras-related pr RAB5B    |
| 0.07  | -0.04 | 0.12  | 0.31  | 0.03  | 0.00  | -0.23 | -0.29 | -0.02 | -0.12 | -0.04 | -0.17 | 8 Ras-related pr RAB5C    |
| 0.09  | 0.13  | -0.01 | 0.22  | -0.08 | -0.01 | 0.03  | 0.19  | 0.05  | 0.30  | -0.07 | 0.11  | 15 Ras-related pr RAB6A   |
| -0.05 | 0.03  | 0.09  | 0.25  | -0.04 | -0.01 | -0.20 | -0.15 | 0.03  | 0.30  | 0.15  | 0.26  | 14 Ras-related pr RAB7A   |
| -0.30 | -0.04 | 0.05  | 0.46  | -0.22 | -0.11 | -0.17 | 0.03  | -0.06 | 0.14  | 0.04  | 0.30  | 8 Ras-related pr RAB8A    |
| 0.16  | 0.02  | 0.14  | 0.21  | 0.23  | 0.31  | 0.43  | 0.42  | -0.01 | 0.11  | 0.05  | 0.11  | 17 Rab GTPase-a RABGAP1   |
| -0.04 | -0.11 | 0.40  | 0.25  | -0.07 | -0.04 | -0.10 | -0.03 | 0.11  | 0.09  | -0.09 | 0.00  | 9 Ras-related C RAC1;RAC3 |
| -0.18 | 0.26  | 0.15  | 0.20  | -0.09 | -0.07 | 0.47  | 0.59  | -0.01 | -0.29 | -0.20 | 0.08  | 13 UV excision re RAD23B  |
| 0.10  | 0.11  | 0.08  | -0.06 | -0.04 | -0.01 | 0.40  | 0.41  | -0.19 | -0.17 | -0.09 | -0.05 | 38 DNA repair pr RAD50    |
| -0.21 | -0.19 | 0.40  | 0.26  | 0.07  | 0.14  | 0.01  | 0.19  | -0.07 | 0.11  | -0.29 | 0.03  | 6 Ras-related pr RALA     |
| -0.12 | -0.08 | 0.06  | -0.06 | 0.11  | 0.08  | 0.04  | -0.05 | -0.08 | -0.05 | -0.02 | -0.07 | 17 GTP-binding n RAN      |
| 0.11  | 0.05  | -0.16 | 0.03  | 0.04  | 0.02  | 0.12  | -0.10 | -0.30 | -0.36 | -0.07 | -0.17 | 8 Ran-specific G RANBP1   |
| 0.35  | 0.11  | 0.12  | -0.27 | 0.18  | -0.03 | 0.10  | -0.24 | -0.06 | -0.52 | 0.23  | -0.28 | 51 E3 SUMO-pro RANBP2     |
| -0.01 | -0.03 | 0.16  | -0.08 | 0.11  | 0.10  | -0.13 | -0.11 | -0.01 | -0.03 | -0.03 | -0.05 | 17 Ran GTPase-a RANGAP1   |
| -0.19 | -0.21 | 0.10  | 0.21  | -0.05 | 0.13  | 0.01  | 0.19  | -0.13 | 0.13  | -0.14 | -0.05 | 12 Ras-related pr RAP1B   |



|       |       |       |       |       |       |       |       |       |       |       |       |                                      |
|-------|-------|-------|-------|-------|-------|-------|-------|-------|-------|-------|-------|--------------------------------------|
| 0.08  | -0.13 | 0.12  | -0.09 | 0.11  | 0.26  | -0.40 | -0.28 | 0.07  | -0.12 | 0.05  | -0.01 | 14 Rap1 GTPase- RAP1GDS1             |
| 0.07  | 0.26  | -0.23 | -0.21 | -0.05 | -0.10 | 0.31  | 0.31  | -0.11 | 0.01  | -0.15 | -0.13 | 18 Arginine--trN. RARS               |
| -0.36 | -0.13 | 0.22  | -0.11 | 0.07  | -0.06 | 0.45  | 0.48  | -0.21 | -0.27 | -0.02 | -0.12 | 11 Histone-binding RBBP4             |
| 0.11  | 0.18  | -0.23 | -0.33 | 0.22  | 0.31  | 0.11  | -0.06 | -0.01 | 0.04  | -0.01 | -0.12 | 13 Histone-binding RBBP7             |
| 0.30  | 0.07  | -0.04 | -1.42 | -0.09 | 0.06  | -0.50 | -0.49 | 0.23  | -1.02 | 0.34  | -0.91 | 12 RNA-binding protein RBM25         |
| 0.05  | 0.17  | 0.14  | -0.03 | 0.07  | 0.19  | 0.04  | -0.04 | -0.11 | -0.37 | 0.62  | 0.08  | 4 RNA-binding protein RBM26          |
| 0.18  | 0.25  | 0.01  | 0.22  | 0.11  | 0.06  | 0.19  | -0.13 | -0.15 | -0.10 | 0.40  | 0.19  | 8 Regulator of c RCC1                |
| 0.05  | 0.11  | -0.23 | -0.21 | 0.11  | 0.01  | 0.23  | 0.30  | -0.08 | -0.28 | -0.08 | -0.03 | 16 Protein RCC2 RCC2                 |
| 0.00  | 0.10  | 0.03  | 0.20  | -0.05 | 0.06  | 0.11  | 0.20  | 0.18  | 0.16  | -0.07 | 0.11  | 9 Retinol dehyd RDH11                |
| -0.05 | 0.34  | 0.03  | 0.18  | 0.19  | 0.27  | -0.09 | 0.25  | 0.14  | 0.14  | -0.04 | 0.09  | 33 Radixin RDX                       |
| 0.23  | -0.14 | -0.63 | -0.14 | -0.10 | 0.08  | -0.13 | 0.02  | -0.02 | 0.06  | 0.10  | 0.28  | 16 ATP-dependent RECQL               |
| 0.18  | -0.10 | 0.11  | 0.19  | -0.02 | 0.21  | -0.41 | -0.60 | -0.10 | -0.11 | -0.16 | -0.21 | 8 Oligoribonucle REXO2               |
| 0.37  | 0.30  | -0.30 | -0.33 | 0.07  | 0.17  | 0.13  | 0.09  | -0.16 | -0.06 | -0.01 | -0.19 | 7 Replication factor RFC2            |
| 0.19  | 0.22  | 0.01  | -0.28 | 0.15  | 0.29  | -0.05 | -0.10 | -0.02 | -0.12 | -0.02 | -0.04 | 6 Replication factor RFC3            |
| -0.14 | -0.19 | 0.28  | 0.10  | 0.04  | 0.02  | 0.06  | 0.00  | 0.07  | 0.12  | 0.19  | 0.06  | 9 Transforming RHOA;RHOC             |
| 0.00  | -0.19 | 0.28  | 0.17  | 0.12  | 0.18  | -0.12 | -0.09 | -0.03 | 0.11  | -0.10 | -0.03 | 12 Rho-related G RHOC                |
| -0.08 | -0.15 | 0.21  | -0.26 | 0.29  | 0.05  | 0.38  | 0.15  | 0.09  | -0.20 | 0.44  | 0.08  | 8 E3 ubiquitin-p RNF40               |
| -0.08 | 0.23  | 0.09  | 0.63  | -0.09 | -0.08 | -0.15 | -0.04 | 0.08  | 0.09  | 0.22  | 0.49  | 20 Ribonuclease RNH1                 |
| -0.20 | -0.65 | -0.21 | -0.07 | 0.26  | 0.21  | 0.26  | 0.41  | -0.25 | -0.16 | 0.22  | 0.55  | 13 Aminopeptidase RNPEP              |
| 0.01  | -0.02 | -0.18 | -0.01 | -0.05 | 0.13  | 0.37  | 0.62  | -0.01 | 0.26  | -0.04 | 0.05  | 24 Rho-associate ROCK1               |
| 0.10  | 0.04  | 0.07  | -0.15 | 0.02  | -0.01 | -0.04 | -0.12 | 0.00  | -0.10 | 0.16  | 0.05  | 19 60S ribosomal RPL10               |
| 0.01  | -0.12 | -0.50 | -0.22 | 0.03  | -0.05 | -0.15 | -0.27 | 0.07  | -0.08 | 0.12  | -0.02 | 12 60S ribosomal RPL10A              |
| -0.06 | -0.19 | -0.07 | -0.13 | -0.03 | -0.11 | -0.05 | -0.15 | -0.01 | -0.07 | 0.11  | -0.01 | 12 60S ribosomal RPL11               |
| -0.03 | -0.19 | -0.01 | -0.15 | -0.03 | -0.10 | -0.20 | -0.26 | 0.03  | -0.05 | 0.07  | -0.04 | 8 60S ribosomal RPL12                |
| -0.04 | -0.10 | -0.20 | -0.18 | -0.07 | -0.12 | -0.15 | -0.19 | -0.08 | -0.10 | 0.06  | 0.02  | 20 60S ribosomal RPL13               |
| -0.01 | -0.03 | -0.26 | -0.23 | 0.01  | -0.05 | -0.14 | -0.23 | -0.04 | -0.12 | 0.13  | -0.06 | 15 60S ribosomal RPL13A;RPL13a       |
| 0.09  | -0.09 | -0.21 | -0.16 | 0.00  | -0.05 | -0.10 | -0.16 | 0.11  | 0.07  | 0.04  | 0.03  | 10 60S ribosomal RPL14               |
| 0.02  | -0.10 | -0.05 | -0.06 | -0.03 | -0.06 | -0.13 | -0.19 | 0.08  | -0.06 | 0.13  | 0.04  | 12 60S ribosomal RPL15               |
| 0.02  | -0.05 | -0.29 | -0.29 | 0.02  | -0.04 | -0.11 | -0.06 | -0.03 | -0.19 | 0.03  | 0.01  | 9 60S ribosomal RPL17                |
| 0.03  | -0.15 | 0.00  | -0.05 | 0.00  | -0.02 | -0.11 | -0.11 | -0.02 | -0.05 | 0.06  | 0.02  | 13 60S ribosomal RPL18               |
| 0.08  | 0.00  | 0.05  | -0.09 | -0.03 | 0.01  | -0.05 | -0.17 | -0.03 | -0.11 | 0.08  | 0.01  | 11 60S ribosomal RPL18A              |
| 0.11  | -0.01 | 0.04  | -0.01 | 0.02  | -0.03 | -0.01 | -0.15 | 0.06  | -0.03 | 0.16  | 0.04  | 15 Ribosomal protein RPL19           |
| 0.05  | -0.03 | -0.29 | -0.23 | 0.06  | -0.01 | 0.00  | -0.12 | 0.04  | -0.07 | 0.11  | 0.03  | 9 60S ribosomal RPL21                |
| 0.23  | 0.32  | -0.23 | -0.01 | -0.04 | -0.07 | -0.02 | -0.04 | -0.07 | -0.02 | 0.02  | 0.04  | 9 60S ribosomal RPL22                |
| 0.06  | -0.13 | -0.24 | -0.20 | -0.12 | -0.11 | -0.07 | -0.17 | -0.01 | -0.12 | 0.08  | 0.01  | 12 60S ribosomal RPL23A              |
| 0.10  | -0.04 | -0.07 | -0.05 | 0.08  | -0.03 | 0.07  | -0.08 | -0.07 | -0.07 | 0.09  | 0.03  | 11 60S ribosomal RPL24               |
| 0.07  | -0.02 | 0.04  | -0.13 | 0.01  | -0.07 | -0.08 | -0.15 | 0.02  | -0.08 | 0.09  | 0.00  | 14 60S ribosomal RPL26;KRBA2;RPL26L1 |
| -0.01 | -0.10 | -0.13 | -0.10 | 0.03  | -0.04 | -0.12 | -0.16 | -0.03 | -0.11 | 0.10  | -0.03 | 11 60S ribosomal RPL27               |
| 0.03  | -0.07 | -0.21 | -0.16 | -0.11 | -0.08 | -0.10 | -0.17 | -0.03 | -0.11 | 0.06  | 0.01  | 8 60S ribosomal RPL27A               |
| -0.04 | -0.16 | -0.10 | -0.18 | 0.00  | -0.08 | -0.12 | -0.18 | -0.03 | -0.06 | 0.06  | -0.04 | 12 60S ribosomal RPL28               |
| -0.11 | -0.22 | 0.03  | -0.14 | -0.04 | -0.08 | -0.13 | -0.25 | -0.17 | -0.21 | -0.22 | -0.27 | 4 60S ribosomal RPL29                |
| 0.03  | 0.07  | -0.36 | -0.33 | -0.09 | -0.09 | -0.16 | -0.19 | -0.03 | -0.15 | 0.08  | 0.00  | 22 60S ribosomal RPL3                |
| 0.00  | -0.01 | -0.07 | -0.07 | -0.04 | -0.06 | -0.18 | -0.18 | 0.03  | -0.17 | 0.10  | -0.01 | 13 60S ribosomal RPL32               |
| 0.07  | 0.01  | 0.03  | -0.05 | 0.00  | -0.05 | -0.01 | -0.13 | 0.01  | -0.09 | 0.08  | 0.00  | 8 60S ribosomal RPL34                |
| 0.20  | 0.00  | 0.06  | -0.09 | 0.07  | 0.03  | -0.02 | -0.06 | 0.00  | -0.03 | 0.11  | 0.02  | 8 60S ribosomal RPL35                |
| 0.06  | -0.11 | -0.12 | -0.12 | -0.09 | -0.08 | -0.10 | -0.17 | -0.08 | -0.22 | 0.12  | -0.03 | 8 60S ribosomal RPL36A               |
| -0.03 | -0.11 | -0.10 | -0.15 | -0.02 | -0.06 | -0.18 | -0.25 | 0.04  | -0.09 | 0.11  | 0.03  | 29 60S ribosomal RPL4                |
| 0.00  | -0.02 | -0.25 | -0.15 | 0.02  | -0.05 | -0.09 | -0.19 | -0.04 | -0.12 | 0.12  | -0.01 | 19 60S ribosomal RPL5                |
| 0.01  | -0.11 | -0.13 | -0.18 | -0.08 | -0.12 | -0.21 | -0.24 | 0.01  | -0.10 | 0.03  | -0.03 | 23 60S ribosomal RPL6                |
| 0.01  | -0.10 | -0.01 | -0.12 | 0.00  | -0.12 | -0.15 | -0.25 | -0.05 | -0.11 | 0.10  | 0.04  | 23 60S ribosomal RPL7                |

|       |       |       |       |       |       |       |       |       |       |       |       |                                       |
|-------|-------|-------|-------|-------|-------|-------|-------|-------|-------|-------|-------|---------------------------------------|
| 0.00  | -0.03 | -0.14 | -0.21 | -0.07 | -0.10 | -0.10 | -0.29 | -0.08 | -0.09 | 0.03  | 0.00  | 22 60S ribosomal RPL7A                |
| -0.01 | -0.12 | 0.03  | -0.16 | 0.01  | -0.04 | -0.14 | -0.22 | 0.03  | -0.04 | 0.07  | -0.03 | 12 60S ribosomal RPL8                 |
| 0.00  | 0.03  | -0.14 | -0.24 | -0.08 | -0.06 | -0.06 | -0.12 | -0.03 | -0.15 | 0.06  | 0.02  | 9 60S ribosomal RPL9                  |
| 0.00  | -0.10 | 0.13  | -0.06 | -0.01 | -0.07 | -0.23 | -0.34 | -0.05 | -0.03 | 0.18  | -0.01 | 10 60S acidic ribc RPLP0;RPLPOP6      |
| 0.15  | 0.11  | -0.05 | -0.08 | -0.03 | -0.04 | 0.01  | 0.16  | -0.20 | -0.10 | -0.11 | -0.09 | 22 Dolichyl-diphc RPN1                |
| 0.13  | 0.09  | 0.19  | 0.01  | -0.05 | 0.02  | 0.06  | 0.20  | -0.21 | -0.11 | -0.18 | -0.11 | 13 Dolichyl-diphc RPN2                |
| -0.12 | -0.14 | -0.03 | -0.13 | -0.03 | -0.10 | 0.10  | -0.07 | -0.09 | -0.19 | 0.01  | -0.06 | 12 40S ribosomal RPS10;RPS10P5        |
| 0.05  | -0.04 | -0.05 | -0.05 | 0.03  | -0.06 | -0.04 | -0.10 | -0.04 | -0.02 | 0.03  | 0.01  | 15 40S ribosomal RPS11                |
| -0.02 | 0.19  | -0.04 | -0.06 | 0.06  | -0.01 | 0.05  | -0.02 | -0.02 | -0.11 | 0.05  | 0.03  | 9 40S ribosomal RPS12                 |
| 0.01  | -0.10 | 0.08  | -0.05 | -0.03 | -0.04 | -0.06 | -0.09 | -0.02 | -0.16 | 0.10  | 0.01  | 10 40S ribosomal RPS13                |
| -0.11 | -0.10 | -0.39 | -0.29 | -0.07 | -0.13 | -0.28 | -0.25 | -0.14 | -0.09 | -0.21 | -0.09 | 7 40S ribosomal RPS15                 |
| 0.03  | 0.03  | -0.21 | -0.08 | 0.05  | -0.04 | -0.05 | -0.06 | -0.04 | -0.02 | 0.05  | 0.03  | 12 40S ribosomal RPS15A               |
| 0.07  | 0.10  | -0.02 | -0.08 | 0.01  | -0.10 | -0.02 | -0.15 | -0.11 | -0.19 | 0.03  | 0.00  | 11 40S ribosomal RPS17;RPS17L         |
| 0.07  | 0.07  | 0.01  | -0.01 | 0.00  | -0.08 | -0.05 | -0.11 | -0.06 | -0.10 | 0.04  | -0.04 | 16 40S ribosomal RPS18                |
| 0.00  | -0.08 | 0.04  | -0.07 | 0.04  | -0.10 | -0.12 | -0.21 | -0.11 | -0.09 | -0.01 | 0.00  | 16 40S ribosomal RPS2                 |
| -0.01 | -0.16 | -0.20 | -0.23 | 0.00  | 0.00  | -0.10 | -0.08 | -0.09 | -0.33 | 0.05  | 0.00  | 7 40S ribosomal RPS21                 |
| 0.08  | -0.05 | -0.18 | -0.08 | 0.00  | -0.08 | 0.04  | -0.11 | -0.01 | -0.04 | 0.04  | -0.06 | 6 40S ribosomal RPS23                 |
| 0.05  | -0.04 | -0.21 | -0.11 | -0.02 | -0.10 | -0.05 | -0.23 | -0.04 | -0.11 | 0.12  | -0.02 | 5 40S ribosomal RPS24                 |
| 0.04  | -0.15 | -0.21 | -0.05 | -0.02 | -0.08 | 0.01  | -0.07 | -0.05 | -0.13 | 0.10  | -0.03 | 9 40S ribosomal RPS25                 |
| 0.07  | -0.04 | 0.40  | 0.16  | 0.03  | 0.05  | 0.02  | 0.07  | -0.12 | -0.14 | -0.03 | -0.06 | 11 Ubiquitin-40S RPS27A;UBB;UBC;UBA52 |
| -0.05 | -0.15 | -0.07 | -0.06 | -0.03 | -0.06 | -0.15 | -0.25 | -0.13 | -0.23 | 0.00  | -0.10 | 26 40S ribosomal RPS3                 |
| 0.03  | -0.03 | -0.07 | -0.16 | -0.03 | -0.05 | -0.12 | -0.21 | -0.04 | -0.05 | 0.05  | -0.04 | 25 40S ribosomal RPS3A                |
| 0.01  | -0.09 | -0.10 | -0.24 | -0.04 | -0.06 | -0.13 | -0.22 | -0.02 | 0.01  | 0.05  | 0.01  | 21 40S ribosomal RPS4X                |
| 0.00  | -0.13 | 0.07  | -0.11 | -0.02 | -0.05 | -0.03 | -0.08 | -0.07 | -0.08 | 0.05  | 0.01  | 17 40S ribosomal RPS5                 |
| 0.13  | -0.05 | -0.05 | -0.24 | -0.05 | -0.11 | -0.09 | -0.17 | -0.01 | -0.03 | 0.12  | -0.09 | 17 40S ribosomal RPS6                 |
| 0.11  | -0.05 | -0.07 | -0.21 | 0.06  | 0.19  | 0.01  | 0.30  | -0.39 | -0.45 | -0.02 | 0.23  | 14 Ribosomal prc RPS6KA1              |
| 0.05  | -0.03 | 0.04  | -0.13 | -0.02 | -0.12 | -0.03 | -0.07 | -0.03 | -0.09 | 0.02  | -0.05 | 18 40S ribosomal RPS7                 |
| 0.08  | -0.02 | -0.12 | -0.18 | 0.01  | -0.11 | -0.13 | -0.20 | -0.01 | -0.11 | 0.03  | -0.10 | 15 40S ribosomal RPS8                 |
| 0.02  | -0.06 | 0.03  | -0.05 | -0.01 | -0.09 | -0.01 | -0.09 | -0.07 | 0.02  | 0.06  | -0.02 | 20 40S ribosomal RPS9                 |
| -0.06 | -0.07 | -0.10 | -0.16 | 0.02  | -0.10 | -0.11 | -0.18 | -0.06 | -0.18 | 0.03  | -0.05 | 14 40S ribosomal RPSA                 |
| -1.04 | -1.46 | 0.15  | 0.20  | 0.26  | 0.46  | 0.01  | -0.02 | 0.23  | 0.45  | -0.22 | 0.11  | 6 Ras-related pr RRAS                 |
| -0.18 | -0.38 | 0.30  | 0.17  | -0.02 | 0.26  | -0.29 | 0.01  | -0.07 | 0.12  | 0.25  | 0.27  | 7 Ras-related pr RRAS2                |
| 0.47  | 0.09  | 0.01  | -0.10 | 0.30  | 0.26  | 0.37  | 0.25  | -0.11 | 0.14  | -0.48 | -0.51 | 49 Ribosome-bin RRBP1                 |
| 0.16  | 0.52  | 0.71  | -0.05 | 0.10  | -0.26 | 1.29  | 1.02  | 0.13  | -0.75 | 0.15  | -0.33 | 15 Ribonucleosid RRM1                 |
| -0.07 | -0.38 | 0.00  | -0.35 | -0.21 | -0.25 | 0.18  | -0.03 | 0.10  | -0.31 | 0.38  | 0.40  | 13 RRP12-like prc RRP12               |
| -0.12 | 0.08  | -0.76 | -0.14 | -0.18 | -0.13 | -0.30 | 0.25  | 0.37  | 0.59  | -0.22 | 0.17  | 5 Reticulon-4 RTN4                    |
| 0.28  | 0.39  | -0.30 | 0.10  | 0.06  | 0.08  | -0.07 | -0.12 | -0.05 | -0.05 | -0.09 | -0.05 | 11 RuvB-like 1 RUVBL1                 |
| 0.26  | 0.39  | 0.23  | 0.10  | 0.16  | 0.16  | -0.07 | -0.23 | 0.05  | -0.10 | -0.21 | -0.26 | 19 RuvB-like 2 RUVBL2                 |
| 0.26  | 0.13  | -0.05 | -0.08 | 0.10  | -0.06 | 0.07  | 0.09  | -0.09 | -0.07 | 0.11  | -0.07 | 15 SUMO-activat SAE1                  |
| -0.01 | 0.08  | 0.09  | 0.23  | -0.04 | 0.10  | 0.05  | 0.17  | -0.14 | 0.02  | -0.33 | 0.03  | 12 GTP-binding p SAR1A                |
| 0.20  | -0.10 | -0.23 | -0.60 | 0.24  | 0.26  | -0.24 | -0.29 | 0.08  | -0.02 | -0.14 | -0.12 | 7 SAP domain-c SARNP                  |
| -0.21 | -0.14 | -0.38 | -0.31 | -0.17 | 0.08  | -0.81 | -0.46 | 0.10  | 0.46  | -0.05 | 0.27  | 12 Serine--tRNA ISARS                 |
| 0.12  | 0.13  | 0.10  | -0.15 | 0.06  | 0.15  | 0.15  | 0.16  | -0.03 | -0.19 | 0.26  | -0.13 | 11 Squamous cel SART3                 |
| 0.04  | 0.15  | 0.02  | 0.08  | -0.01 | 0.13  | -0.21 | -0.11 | 0.01  | -0.33 | 0.05  | 0.04  | 14 Ribosome ma SBDS                   |
| 0.00  | -0.07 | 0.06  | 0.23  | 0.06  | 0.13  | -0.33 | -0.08 | 0.04  | 0.00  | -0.40 | -0.29 | 6 Sec1 family dc SCFD1                |
| 0.05  | 0.28  | -0.37 | -0.15 | 0.37  | 0.42  | 0.45  | 0.71  | 0.05  | 0.22  | -0.01 | 0.02  | 13 Succinate deh SDHA                 |
| 0.04  | 0.08  | 0.15  | 0.25  | 0.05  | 0.29  | -0.23 | -0.17 | 0.06  | 0.15  | -0.13 | -0.01 | 8 Vesicle-traffic SEC22B              |
| 0.04  | -0.25 | 0.11  | 0.08  | 0.07  | 0.14  | -0.40 | -0.18 | -0.16 | 0.00  | -0.52 | -0.26 | 18 Protein transp SEC23A              |
| 0.08  | 0.05  | -0.08 | 0.05  | -0.32 | -0.01 | -0.21 | -0.31 | 0.06  | 0.08  | -0.18 | -0.04 | 13 Protein transp SEC23B              |
| -0.05 | -0.15 | 0.25  | 0.09  | -0.10 | -0.09 | 0.19  | 0.13  | 0.12  | -0.65 | 0.21  | -0.02 | 7 Protein transp SEC24B               |

|       |       |       |       |       |       |       |       |       |       |       |       |                    |                    |
|-------|-------|-------|-------|-------|-------|-------|-------|-------|-------|-------|-------|--------------------|--------------------|
| -0.28 | -0.29 | -0.04 | -0.10 | 0.01  | -0.01 | -0.29 | -0.18 | -0.11 | 0.11  | -0.08 | 0.01  | 14 Protein transp  | SEC24C             |
| -0.07 | -0.37 | -0.07 | -0.16 | 0.03  | 0.02  | -0.21 | -0.27 | -0.10 | -0.28 | -0.09 | -0.06 | 24 Protein transp  | SEC31A             |
| 0.12  | -0.04 | 0.10  | 0.00  | 0.17  | 0.17  | -0.01 | 0.00  | 0.02  | 0.05  | -0.15 | -0.37 | 11 Septin-11       | Sept11             |
| 0.13  | -0.08 | 0.08  | 0.12  | 0.10  | 0.13  | 0.02  | 0.10  | -0.15 | 0.03  | 0.06  | -0.04 | 17 Septin-2        | Sept2              |
| -0.02 | 0.00  | 0.11  | 0.02  | 0.10  | 0.19  | 0.03  | 0.10  | -0.07 | 0.10  | -0.06 | -0.03 | 18 Septin-7        | Sept7              |
| 0.03  | -0.22 | -0.09 | -0.11 | 0.05  | 0.16  | 0.10  | -0.01 | -0.23 | -0.16 | -0.04 | 0.10  | 23 Septin-9        | Sept9              |
| -0.01 | 0.08  | 0.01  | -0.17 | -0.07 | -0.06 | 0.00  | -0.03 | 0.01  | -0.18 | 0.11  | 0.05  | 16 Plasminogen z   | SERBP1             |
| -1.75 | 0.41  | -0.53 | 1.52  | -0.14 | 0.89  | -0.99 | -0.34 | 1.04  | 2.16  | -0.10 | 1.86  | 13 Plasminogen z   | SERPINB2;SERPINB10 |
| -0.32 | 0.57  | -0.19 | 0.72  | -0.12 | -0.37 | 0.44  | 0.71  | 0.38  | 0.46  | 0.27  | 0.62  | 34 Serpin B5       | SERPINB5           |
| 0.15  | -0.55 | -0.14 | -0.56 | 0.17  | -0.02 | -0.29 | -0.19 | -0.48 | -0.32 | -0.13 | -0.27 | 19 Serpin H1       | SERPINH1           |
| -0.41 | -0.31 | -0.22 | 0.23  | -0.06 | -0.20 | 0.45  | 0.41  | -0.45 | -0.84 | -0.17 | -0.13 | 10 Protein SET     | SET                |
| 0.03  | 0.00  | -0.29 | -0.72 | 0.28  | 0.20  | 0.13  | 0.05  | -0.20 | -0.28 | -0.04 | -0.42 | 5 Splicing factor  | SF1                |
| 0.07  | -0.05 | 0.02  | -0.27 | 0.14  | 0.09  | -0.30 | -0.24 | -0.01 | -0.35 | 0.25  | -0.17 | 16 Splicing factor | SF3A1              |
| -0.04 | -0.25 | 0.19  | -0.51 | 0.22  | 0.08  | -0.13 | -0.22 | -0.07 | -0.59 | 0.07  | -0.45 | 33 Splicing factor | SF3B1              |
| 0.09  | 0.02  | 0.00  | -0.67 | 0.24  | 0.18  | -0.16 | -0.29 | -0.19 | -0.58 | 0.12  | -0.46 | 17 Splicing factor | SF3B2              |
| 0.04  | -0.13 | 0.25  | -0.31 | 0.08  | -0.13 | 0.34  | 0.02  | -0.16 | -0.57 | 0.13  | -0.43 | 25 Splicing factor | SF3B3              |
| -0.34 | 0.02  | 0.07  | 0.27  | -0.01 | -0.13 | -0.04 | 0.17  | 0.33  | 0.31  | 0.17  | 0.46  | 27 14-3-3 proteir  | SFN                |
| 0.73  | -0.11 | -0.53 | -1.30 | 0.08  | 0.34  | -0.61 | -0.43 | 0.08  | -0.40 | 0.15  | -0.82 | 19 Splicing factor | SFPQ               |
| -0.08 | 0.23  | -0.03 | 0.32  | 0.04  | 0.22  | 0.20  | 0.42  | -0.19 | 0.02  | -0.28 | -0.16 | 12 Sideroflexin-1  | SFXN1              |
| 0.09  | 0.18  | -0.35 | -0.02 | -0.31 | -0.21 | -0.19 | -0.27 | -0.14 | 0.23  | -0.22 | 0.07  | 18 Serine hydrox   | SHMT2              |
| 0.34  | 0.31  | -0.02 | -0.29 | 0.10  | 0.06  | 0.49  | 0.18  | 0.11  | -0.24 | 0.04  | -0.40 | 13 Superkiller vir | SKIV2L2            |
| -0.14 | -0.13 | 0.53  | -0.01 | -0.09 | -0.22 | -0.02 | 0.14  | -0.11 | -0.10 | -0.27 | -0.21 | 3 Monocarboxy      | SLC16A1            |
| 0.15  | 0.24  | 0.28  | -0.16 | -0.61 | -0.50 | 0.46  | 0.34  | -0.35 | -0.46 | 0.27  | 0.19  | 6 Neutral aminc    | SLC1A5             |
| -0.23 | 0.02  | -0.05 | 0.14  | 0.26  | 0.24  | 0.22  | 0.34  | 0.19  | 0.14  | -0.50 | -0.23 | 14 Phosphate cai   | SLC25A3            |
| 0.13  | 0.58  | -0.02 | 0.30  | -0.01 | 0.00  | 0.56  | 0.51  | 0.01  | 0.07  | 0.22  | 0.37  | 23 ADP/ATP tran    | SLC25A5            |
| -0.30 | 0.57  | 0.07  | 0.79  | -0.47 | -1.87 | 0.79  | 0.94  | 0.51  | 0.22  | 0.68  | 0.56  | 4 Solute carrier   | SLC2A1             |
| -0.22 | -0.37 | 0.11  | 0.01  | -0.41 | -0.19 | 0.39  | 0.52  | -0.91 | -0.35 | -0.02 | 0.23  | 19 4F2 cell-surfar | SLC3A2             |
| -0.31 | -0.72 | 0.02  | -0.22 | -0.30 | -0.30 | 0.25  | 0.33  | -0.89 | -0.63 | -0.09 | -0.07 | 8 Large neutral    | SLC7A5             |
| 0.10  | 0.20  | -0.01 | 0.16  | 0.11  | 0.12  | 0.05  | 0.23  | 0.10  | -0.12 | 0.21  | 0.15  | 28 STE20-like ser  | SLK                |
| 0.14  | 0.10  | 0.24  | -0.14 | 0.11  | 0.05  | 0.58  | 0.08  | -0.03 | -0.09 | -0.32 | -0.39 | 14 SWI/SNF com     | SMARCC2            |
| -0.09 | -0.07 | -0.16 | -0.29 | 0.24  | 0.19  | 0.59  | 0.61  | -0.20 | -0.15 | 0.21  | -0.03 | 34 Structural mai  | SMC1A              |
| 0.04  | -0.02 | 0.14  | 0.06  | 0.15  | 0.24  | -0.19 | -0.16 | -0.17 | -0.28 | -0.05 | 0.03  | 42 Structural mai  | SMC2               |
| -0.19 | -0.08 | -0.15 | -0.13 | 0.17  | 0.11  | 0.70  | 0.65  | 0.01  | -0.14 | 0.15  | -0.02 | 30 Structural mai  | SMC3               |
| 0.14  | -0.14 | 0.12  | 0.05  | 0.22  | 0.15  | 0.01  | -0.12 | -0.08 | -0.22 | -0.08 | -0.11 | 36 Structural mai  | SMC4               |
| 0.01  | 0.24  | 0.10  | -0.07 | 0.11  | 0.18  | 0.22  | 0.27  | -0.08 | -0.04 | -0.21 | -0.16 | 13 Serine/threon   | SMG1               |
| -0.05 | -0.20 | 0.03  | -0.23 | -0.12 | -0.02 | -0.07 | -0.05 | -0.11 | -0.03 | -0.07 | -0.01 | 55 Staphylococce   | SND1               |
| 0.08  | -0.04 | 0.10  | -0.41 | 0.14  | 0.03  | 0.26  | 0.12  | 0.26  | -0.27 | 0.05  | -0.38 | 38 U5 small nucl   | SNRNP200           |
| 0.12  | -0.01 | -0.02 | -0.08 | -0.08 | -0.09 | 0.11  | 0.12  | 0.02  | -0.04 | -0.08 | 0.01  | 7 Sorting nexin-   | SNX12              |
| 0.17  | 0.32  | -0.01 | 0.11  | 0.01  | 0.01  | 0.03  | 0.21  | -0.06 | -0.07 | -0.04 | -0.08 | 7 Sorting nexin-   | SNX3               |
| 0.06  | 0.01  | -0.28 | -0.08 | -0.05 | -0.01 | -0.77 | -0.47 | -0.20 | -0.05 | -0.20 | -0.17 | 5 Superoxide di:   | SOD1               |
| -0.84 | 0.12  | -0.07 | 0.66  | 0.70  | 0.88  | 0.96  | 1.17  | -0.43 | 1.29  | -0.22 | 0.49  | 7 Superoxide di:   | SOD2               |
| 0.20  | 0.54  | 0.02  | 0.19  | 0.00  | -0.06 | -0.21 | -0.42 | -0.33 | -0.47 | 0.33  | 0.29  | 12 Sorbitol dehyr  | SORD               |
| 0.13  | 0.33  | -0.11 | 0.22  | -0.17 | -0.03 | -0.40 | -0.14 | -0.08 | 0.14  | -0.04 | -0.30 | 17 C-Jun-amino-t   | SPAG9              |
| -0.07 | -0.09 | -0.11 | 0.07  | -0.22 | -0.04 | -0.08 | 0.06  | -0.02 | 0.17  | -0.02 | 0.12  | 14 Signal peptida  | SPCS2              |
| -1.40 | 2.84  | -1.22 | 3.32  | -1.52 | -0.91 | 0.28  | 1.33  | 2.43  | 1.99  | 0.56  | 3.02  | 5 Cornifin-A       | SPRR1A             |
| -1.81 | 1.99  | -0.77 | 3.22  | 0.50  | -0.10 | 0.92  | 1.65  | 2.78  | 2.41  | 0.28  | 2.67  | 5 Cornifin-B       | SPRR1B             |
| 0.45  | 0.23  | -0.20 | -0.67 | -0.18 | 0.04  | -0.85 | -0.52 | 0.24  | 0.08  | 0.01  | -0.49 | 110 Spectrin alph  | SPTAN1             |
| 0.43  | 0.15  | -0.11 | -0.62 | -0.21 | 0.03  | -0.98 | -0.60 | 0.21  | 0.12  | 0.03  | -0.52 | 103 Spectrin beta  | SPTBN1             |
| 0.57  | 0.61  | -0.17 | 0.50  | 0.17  | 0.44  | -0.89 | -0.58 | -0.06 | 0.30  | 0.00  | 0.34  | 23 Sulfide:quinor  | SQRDL              |
| 0.23  | 0.08  | -0.07 | 0.14  | -0.07 | 0.12  | -0.42 | -0.41 | -0.25 | -0.20 | -0.18 | -0.14 | 7 Sorcin           | SRI                |

|       |       |       |       |       |       |       |       |       |       |       |       |                                    |
|-------|-------|-------|-------|-------|-------|-------|-------|-------|-------|-------|-------|------------------------------------|
| 0.01  | 0.11  | -0.01 | 0.14  | 0.04  | -0.03 | -0.14 | -0.12 | -0.07 | -0.05 | 0.15  | 0.03  | 11 Signal recogni SRP68            |
| 0.09  | 0.13  | -0.14 | 0.08  | -0.01 | -0.04 | 0.11  | 0.04  | 0.01  | -0.11 | 0.01  | -0.10 | 20 Signal recogni SRP72            |
| 0.11  | -0.38 | -0.20 | -0.22 | -0.29 | -0.16 | -0.51 | -0.56 | -0.16 | 0.03  | -0.16 | -0.20 | 10 Signal recogni SRPRB            |
| 0.05  | -0.21 | -0.18 | -0.37 | 0.45  | 0.32  | -0.09 | -0.10 | -0.05 | -0.02 | -0.04 | -0.05 | 16 Serrate RNA e SRRT              |
| -0.12 | -0.47 | 0.14  | -0.90 | 0.04  | -0.02 | -0.43 | -0.51 | 0.10  | -0.47 | -0.20 | -0.34 | 7 Serine/arginin SRSF6             |
| 0.17  | 0.11  | -0.23 | -0.04 | 0.12  | 0.10  | -0.04 | -0.07 | -0.06 | -0.04 | 0.04  | -0.05 | 17 Lupus La protè SSB              |
| -0.07 | -0.03 | -0.06 | -0.01 | 0.04  | 0.12  | -0.44 | -0.43 | -0.17 | -0.19 | 0.03  | 0.09  | 9 Hsc70-interac ST13;ST13P5;ST13P4 |
| 0.70  | -0.55 | 0.55  | 0.17  | 0.67  | 0.27  | -2.30 | -2.33 | -0.69 | -0.80 | -0.55 | -0.83 | 38 Signal transdu STAT1            |
| 0.04  | 0.07  | 0.26  | 0.01  | 0.36  | 0.38  | 0.44  | 0.42  | 0.23  | -0.13 | 0.11  | 0.40  | 9 Signal transdu STAT3             |
| 0.16  | 0.23  | -0.09 | 0.06  | -0.06 | 0.07  | 0.26  | 0.32  | -0.01 | -0.10 | 0.15  | 0.09  | 26 Stress-induceè STIP1            |
| 0.10  | -0.10 | 0.06  | -0.04 | 0.28  | 0.35  | 0.45  | 0.40  | -0.33 | -0.34 | -0.24 | -0.26 | 15 Stathmin STMN1                  |
| -0.38 | -0.47 | -0.05 | -0.08 | -0.24 | -0.35 | 0.54  | 0.49  | 0.54  | 1.04  | -0.09 | -0.20 | 9 Erythrocyte bi STOM              |
| 0.27  | 0.25  | -0.01 | -0.23 | -0.05 | -0.08 | 0.38  | 0.17  | -0.06 | -0.08 | -0.05 | -0.28 | 9 Stomatin-like STOML2             |
| 0.11  | 0.09  | 0.10  | -0.20 | -0.07 | 0.01  | -0.02 | -0.02 | 0.03  | -0.02 | -0.09 | 0.01  | 18 Serine-threon STRAP             |
| 0.41  | 0.35  | 0.23  | 0.06  | -0.14 | 0.12  | -0.57 | -0.49 | -0.17 | -0.11 | -0.18 | -0.19 | 7 Dolichyl-diphc STT3A             |
| -0.03 | 0.54  | -0.14 | 0.23  | 0.13  | -0.01 | 0.25  | 0.25  | -0.47 | -0.21 | 0.47  | 0.53  | 12 Succinyl-CoA I SUCLA2           |
| 0.04  | -0.03 | 0.05  | 0.03  | 0.31  | 0.32  | -0.18 | -0.07 | -0.16 | -0.13 | -0.01 | 0.02  | 10 Suppressor of SUGT1             |
| 0.25  | 0.21  | 0.46  | 0.28  | 0.20  | 0.25  | -0.35 | -0.28 | -0.12 | -0.21 | 0.20  | 0.04  | 5 Small ubiquiti SUMO1             |
| -0.31 | 0.42  | 0.43  | 0.42  | 0.68  | -0.25 | 0.91  | 0.18  | 0.14  | 0.10  | 0.17  | 0.14  | 12 FACT complex SUPT16H            |
| -0.43 | 0.04  | -0.02 | 0.01  | 0.08  | 0.40  | 0.39  | 0.56  | -0.43 | -0.34 | 0.49  | 0.45  | 10 Switch-associè SWAP70           |
| -0.08 | -0.17 | -0.15 | -0.26 | -0.05 | -0.15 | 0.10  | 0.14  | -0.12 | -0.24 | 0.39  | 0.15  | 13 Heterogeneol SYNCRIP            |
| -1.22 | 0.25  | 1.33  | 2.31  | -0.64 | 0.17  | 0.17  | 0.56  | 0.23  | 0.50  | -0.41 | 1.14  | 6 Tumor-associè TACSTD2            |
| -1.11 | -1.52 | -0.25 | -0.52 | 0.48  | -1.38 | 0.88  | 0.13  | -0.85 | -1.06 | -0.49 | -1.21 | 12 Transgelin TAGLN                |
| -0.11 | -0.14 | -0.03 | 0.12  | 0.15  | 0.11  | 0.27  | 0.30  | 0.10  | 0.27  | 0.01  | 0.16  | 22 Transgelin-2 TAGLN2             |
| -0.01 | 0.34  | -0.31 | 0.18  | -0.02 | -0.03 | 0.27  | 0.46  | 0.25  | 0.04  | 0.28  | 0.47  | 19 Transaldolase TALDO1            |
| 0.11  | 0.02  | 0.10  | -0.31 | 0.04  | -0.05 | 0.09  | 0.03  | -0.15 | 0.01  | -0.14 | -0.13 | 5 TAR DNA-bind TARDBP              |
| -0.20 | -0.15 | -0.05 | 0.11  | -0.19 | -0.06 | -0.13 | 0.01  | -0.09 | 0.21  | -0.13 | 0.07  | 34 Threonine--tR TARS              |
| 0.66  | 0.25  | 0.18  | 0.31  | 0.17  | 0.22  | -0.14 | -0.24 | -0.06 | 0.05  | 0.04  | 0.08  | 8 Tubulin-foldin TBCB              |
| -0.30 | -0.20 | -0.07 | -0.23 | 0.12  | 0.26  | -0.03 | 0.03  | 0.02  | 0.16  | 0.03  | 0.11  | 21 Tubulin-specif TBCD             |
| 0.03  | 0.08  | -0.57 | -0.30 | 0.12  | -0.12 | 0.64  | 0.80  | -0.10 | -0.38 | 0.07  | -0.20 | 21 Transcription TCERG1            |
| -0.05 | 0.07  | -0.03 | -0.61 | -0.11 | -0.07 | -0.16 | -0.04 | -0.20 | -0.29 | -0.12 | -0.23 | 24 Treacle protei TCOF1            |
| 0.05  | 0.21  | -0.20 | 0.14  | 0.00  | 0.06  | 0.20  | 0.10  | -0.10 | -0.07 | 0.10  | 0.12  | 31 T-complex prc TCP1              |
| -0.07 | -0.14 | -0.12 | -0.07 | -0.11 | 0.12  | -0.12 | 0.03  | 0.10  | 0.38  | -0.56 | -0.48 | 23 Testin TES                      |
| -3.82 | -3.76 | -2.35 | -2.91 | -3.55 | -4.21 | -3.87 | -4.14 | -2.70 | -3.40 | -3.82 | -3.55 | 29 Serotransferri TF               |
| -0.51 | -0.06 | -0.64 | -0.24 | -0.27 | -0.30 | 0.80  | 0.78  | -0.47 | -1.06 | 0.17  | 0.52  | 20 Transferrin re TFRC             |
| -1.43 | -2.47 | 0.97  | -1.00 | -1.72 | -3.24 | -1.52 | -2.18 | 0.26  | 0.19  | -2.29 | -2.80 | 65 Thrombospon THBS1               |
| -0.14 | -1.72 | 1.52  | -0.72 | -0.44 | -1.55 | -1.82 | -2.04 | 1.02  | -0.08 | -0.86 | -1.79 | 14 Thrombospon THBS2               |
| -0.07 | 0.02  | -0.02 | 0.85  | -0.16 | 0.08  | -0.26 | -0.12 | -0.04 | -0.43 | -0.01 | -0.15 | 12 Thimet oligop THOP1             |
| -0.08 | 0.08  | -0.09 | -0.85 | 0.28  | 0.42  | -0.61 | -0.45 | 0.20  | 0.15  | 0.06  | -0.21 | 10 Thyroid hormi THRAP3            |
| -0.01 | -0.03 | -0.08 | -0.76 | -0.08 | -0.02 | -0.12 | -0.39 | 0.01  | -0.16 | -0.63 | -0.22 | 12 Tight junction TJP1             |
| -0.04 | 0.32  | 0.55  | 0.33  | -0.10 | 0.50  | -0.31 | 0.07  | 0.16  | 0.39  | -0.47 | 0.00  | 15 Tight junction TJP2             |
| -0.03 | -0.11 | -0.16 | 0.01  | -0.17 | -0.32 | 0.28  | 0.42  | -0.16 | -0.18 | 0.24  | 0.40  | 37 Transketolase TKT               |
| -0.14 | -0.44 | 0.04  | -0.30 | 0.06  | 0.14  | -0.34 | -0.30 | -0.08 | -0.03 | -0.18 | -0.16 | 121 Talin-1 TLN1                   |
| 0.16  | 0.17  | 0.18  | 0.14  | -0.29 | -0.23 | 0.03  | 0.06  | 0.02  | 0.27  | -0.16 | 0.00  | 8 Transmembra TMED10               |
| -0.03 | 0.01  | -0.01 | -0.13 | -0.33 | -0.53 | -0.40 | -0.24 | 0.05  | 0.21  | -0.24 | -0.15 | 6 Transmembra TMED7                |
| 0.03  | 0.07  | -0.11 | -0.01 | -0.21 | -0.26 | -0.08 | 0.02  | 0.03  | 0.33  | -0.22 | -0.09 | 7 Transmembra TMED9                |
| 0.13  | 0.17  | -0.16 | 0.24  | -0.41 | -0.26 | -0.12 | -0.03 | -0.26 | 0.08  | -0.14 | 0.25  | 5 Transmembra TMEM33               |
| -0.26 | -0.38 | 0.13  | 0.33  | -0.14 | 0.18  | -1.20 | -1.18 | 0.59  | 0.99  | -0.25 | 0.14  | 3 Transmembra TMEM40               |
| 0.08  | 0.00  | -0.14 | -0.07 | 0.09  | 0.02  | 0.27  | 0.20  | -0.14 | -0.04 | 0.13  | 0.07  | 11 Transmembra TMEM43              |
| -0.11 | -0.21 | 0.83  | 0.47  | -0.04 | 0.08  | -0.75 | -0.77 | -0.01 | -0.09 | 0.24  | 0.08  | 9 Tropomodulin TMOD3               |

|       |       |       |       |       |       |       |       |       |       |       |       |                                       |
|-------|-------|-------|-------|-------|-------|-------|-------|-------|-------|-------|-------|---------------------------------------|
| 0.14  | 0.53  | -0.11 | 0.15  | 0.05  | 0.02  | 0.35  | 0.54  | 0.33  | 0.18  | 0.40  | 0.38  | 24 182 kDa tanky TNKS1BP1             |
| 0.05  | 0.25  | 0.10  | 0.14  | 0.18  | 0.25  | 0.01  | 0.12  | 0.05  | 0.23  | 0.05  | 0.08  | 16 Transportin-1 TNPO1                |
| -0.47 | -0.76 | 1.21  | 0.67  | -0.15 | -0.43 | -0.52 | -0.71 | 0.03  | -0.30 | -0.39 | -0.41 | 8 Tensin-4 TNS4                       |
| -0.81 | -0.55 | -0.67 | -0.95 | 0.16  | -0.17 | -0.73 | -0.66 | 0.53  | 0.58  | -0.21 | -0.02 | 4 Mitochondrial TOMM40                |
| 0.15  | 0.01  | -0.08 | 0.82  | 0.16  | 0.24  | -0.63 | -0.48 | 0.46  | 0.15  | 0.01  | 0.23  | 6 Quinone oxid TP53I3                 |
| 0.29  | 0.42  | 0.02  | 0.09  | -0.18 | -0.09 | 0.49  | 0.48  | -0.32 | -0.28 | -0.30 | -0.18 | 14 Tumor proteir TPD52L2              |
| 0.08  | 0.08  | 0.06  | 0.04  | 0.04  | -0.06 | 0.24  | 0.29  | 0.02  | 0.02  | 0.15  | 0.13  | 21 Triosephosph TPI1                  |
| -0.50 | -0.93 | 0.66  | 0.02  | 0.33  | 0.14  | 0.41  | -0.02 | -0.60 | -0.48 | 0.37  | 0.09  | 35 Tropomyosin TPM2                   |
| -0.03 | -0.16 | -0.06 | -0.06 | 0.07  | 0.16  | -0.26 | -0.20 | -0.14 | -0.07 | -0.18 | -0.03 | 33 Tropomyosin TPM3                   |
| 0.00  | -0.19 | 0.00  | 0.04  | 0.03  | 0.02  | -0.48 | -0.37 | -0.05 | 0.09  | -0.18 | -0.14 | 39 Tropomyosin TPM4                   |
| -0.22 | -0.48 | -0.08 | -0.11 | -0.10 | -0.12 | -0.24 | -0.22 | -0.07 | 0.03  | -0.02 | -0.01 | 28 Tripeptidyl-pe TPP2                |
| 0.11  | 0.11  | 0.11  | -0.16 | 0.22  | 0.24  | 0.15  | 0.11  | -0.21 | -0.34 | 0.03  | -0.10 | 88 Nucleoproteir TPR                  |
| 0.20  | 0.12  | 0.05  | -0.06 | 0.13  | -0.14 | 0.01  | -0.18 | 0.06  | -0.26 | -0.11 | -0.15 | 11 Translationall TPT1                |
| 0.20  | 0.73  | 0.15  | 0.33  | 0.11  | -0.02 | 0.46  | 0.38  | -0.16 | -0.25 | 0.17  | 0.00  | 13 Heat shock pr TRAP1                |
| 0.46  | -0.16 | 0.12  | 0.04  | 0.13  | 0.19  | -1.23 | -1.25 | -0.07 | 0.00  | -0.03 | -0.24 | 17 E3 ubiquitin/l TRIM25              |
| -0.12 | -0.09 | 0.33  | -0.06 | 0.11  | 0.06  | 0.07  | 0.04  | -0.23 | -0.20 | -0.09 | -0.13 | 26 Transcription TRIM28               |
| -0.61 | 0.27  | -0.53 | -0.21 | 0.37  | -0.01 | 0.59  | 0.87  | 0.55  | -0.10 | 0.50  | 0.70  | 23 Tripartite mot TRIM29              |
| 0.33  | 0.23  | 0.16  | 0.04  | 0.03  | 0.06  | -0.04 | -0.19 | -0.57 | -0.18 | -0.19 | -0.30 | 9 Pachytene chr TRIP13                |
| 0.11  | -0.03 | -0.15 | -0.11 | 0.14  | 0.13  | -0.05 | -0.05 | -0.22 | 0.19  | -0.11 | -0.03 | 10 Translin TSN                       |
| -0.09 | 0.07  | 0.22  | -0.58 | -0.12 | -0.06 | -0.07 | 0.24  | 0.21  | 1.82  | 0.05  | -0.05 | 13 Tetratricopep TTC37                |
| 0.07  | 0.31  | 0.09  | 0.34  | 0.02  | -0.28 | -0.46 | -0.42 | -0.07 | 0.00  | -0.21 | -0.17 | 14 Tubulin--tyros TTL12               |
| -0.21 | -0.19 | -0.08 | 0.05  | 0.08  | 0.05  | 0.15  | 0.11  | 0.01  | 0.09  | -0.17 | -0.13 | 26 Tubulin alpha TUBA1A;TUBA3C;TUBA3E |
| -0.11 | -0.12 | -0.10 | -0.01 | 0.08  | 0.07  | 0.34  | 0.30  | 0.01  | 0.12  | -0.20 | -0.21 | 26 Tubulin alpha TUBA1C               |
| -0.16 | 0.19  | -0.50 | 0.31  | -0.31 | -0.51 | 0.32  | 0.34  | 0.33  | 0.37  | -0.03 | 0.14  | 26 Tubulin alpha TUBA4A               |
| -0.25 | -0.30 | -0.09 | -0.04 | 0.05  | 0.13  | -0.08 | -0.04 | -0.21 | 0.00  | -0.25 | -0.11 | 26 Tubulin beta c TUBB                |
| -0.16 | -0.13 | -0.12 | 0.08  | 0.05  | 0.07  | 0.14  | 0.09  | 0.02  | 0.14  | -0.21 | -0.08 | 28 Tubulin beta-ε TUBB4B              |
| -0.41 | -0.54 | 0.35  | 0.38  | -0.10 | -0.10 | -0.46 | -0.42 | -0.08 | 0.10  | -0.18 | -0.10 | 21 Tubulin beta-ζ TUBB6               |
| 0.10  | 0.23  | 0.08  | 0.20  | 0.01  | -0.03 | 0.16  | 0.14  | -0.36 | -0.40 | 0.21  | 0.12  | 21 Elongation fac TUFM                |
| 0.04  | 0.25  | 0.18  | 0.12  | 0.26  | 0.19  | -0.03 | -0.06 | 0.20  | 0.19  | 0.10  | 0.05  | 9 Twinfilin-1 TWF1                    |
| -0.01 | -0.44 | 0.26  | 0.11  | 0.12  | 0.36  | -0.35 | -0.35 | -0.12 | 0.01  | -0.07 | -0.13 | 8 Twinfilin-2 TWF2                    |
| -0.16 | -0.47 | -0.13 | -0.68 | 0.09  | 0.08  | 0.05  | -0.11 | -0.15 | -0.34 | 0.38  | 0.68  | 11 Alpha-taxilin TXLNA                |
| 0.28  | 0.24  | -0.26 | -0.22 | -0.08 | -0.14 | 0.25  | 0.25  | -0.10 | 0.06  | 0.09  | 0.12  | 11 Thioredoxin d TXNDC5               |
| 0.03  | -0.08 | -0.30 | -0.37 | 0.04  | 0.25  | 0.20  | 0.14  | -0.18 | 0.00  | 0.06  | 0.03  | 12 Thioredoxin-li TXNL1               |
| -0.19 | -0.13 | 0.16  | 0.58  | 0.16  | 0.07  | -2.60 | -2.34 | -0.20 | 0.10  | -1.73 | -0.92 | 12 Thymidine ph TYMP                  |
| -0.11 | -0.11 | -0.16 | -0.91 | 0.33  | 0.14  | -0.47 | -0.59 | -0.14 | -0.60 | 0.05  | -0.46 | 12 U2 snRNP-ass U2SURP                |
| 0.36  | -0.07 | -0.03 | -0.07 | -0.01 | -0.05 | -0.48 | -0.87 | -0.14 | 0.03  | -0.31 | -0.28 | 13 UDP-N-acetyl UAP1                  |
| 0.06  | 0.02  | -0.31 | -0.19 | 0.40  | 0.32  | 0.14  | 0.12  | 0.08  | -0.02 | 0.30  | 0.28  | 52 Ubiquitin-like UBA1                |
| 0.13  | 0.20  | 0.27  | 0.10  | 0.14  | 0.09  | 0.16  | 0.30  | -0.14 | -0.18 | -0.11 | -0.16 | 8 SUMO-activat UBA2                   |
| 0.35  | 0.13  | 0.11  | 0.17  | -0.07 | 0.08  | -0.57 | -0.61 | -0.18 | 0.07  | -0.31 | -0.24 | 37 Ubiquitin-like UBA6                |
| 0.26  | 0.00  | 0.34  | -0.39 | 0.41  | 0.17  | -0.23 | -0.63 | -0.09 | -0.70 | 0.23  | -0.43 | 11 Ubiquitin-assc UBAP2L              |
| 0.11  | -0.06 | -0.06 | 0.05  | 0.10  | 0.07  | -0.05 | -0.02 | -0.21 | -0.24 | -0.01 | -0.13 | 7 SUMO-conjug UBE2I                   |
| 0.07  | 0.13  | 0.03  | 0.05  | 0.02  | 0.21  | 0.04  | 0.13  | -0.11 | -0.21 | -0.29 | -0.03 | 9 Ubiquitin-conj UBE2K                |
| -0.24 | -0.27 | -0.12 | 0.00  | 0.03  | 0.02  | 0.00  | 0.02  | -0.28 | -0.16 | -0.01 | -0.03 | 8 Ubiquitin-conj UBE2L3               |
| 0.23  | 0.23  | -0.09 | 0.00  | 0.06  | 0.06  | 0.16  | 0.08  | 0.04  | 0.05  | 0.08  | -0.01 | 9 NEDD8-conjug UBE2M                  |
| 0.20  | 0.24  | -0.02 | -0.05 | -0.03 | 0.05  | 0.15  | 0.36  | -0.08 | -0.20 | 0.09  | 0.09  | 93 E3 ubiquitin-p UBR4                |
| 1.73  | -0.16 | 0.03  | -1.51 | -0.72 | -0.98 | -2.95 | -3.08 | 0.38  | 0.43  | 0.08  | -0.44 | 15 Ubiquitin carb UCHL1               |
| -0.05 | -0.06 | 0.02  | 0.14  | -0.12 | 0.09  | 0.01  | 0.07  | -0.23 | -0.11 | -0.04 | 0.20  | 13 Ubiquitin carb UCHL3               |
| 0.01  | 0.29  | 0.14  | 0.15  | 0.05  | 0.16  | -0.02 | -0.04 | 0.15  | -0.20 | 0.00  | -0.04 | 6 Ubiquitin carb UCHL5                |
| -0.13 | -0.89 | 0.06  | -0.35 | -0.48 | -0.47 | -0.58 | -0.72 | -0.55 | -0.31 | -0.58 | -0.48 | 11 UDP-glucose ε UGDH                 |
| -0.08 | -0.31 | -0.10 | -0.18 | -0.17 | -0.15 | -0.37 | -0.22 | 0.15  | 0.32  | -0.27 | -0.14 | 32 UDP-glucose:ξ UGGT1                |

|       |       |       |       |       |       |       |       |       |       |       |       |                                  |
|-------|-------|-------|-------|-------|-------|-------|-------|-------|-------|-------|-------|----------------------------------|
| -0.05 | 0.15  | -0.03 | 0.00  | -0.08 | -0.02 | 0.08  | 0.32  | -0.25 | -0.23 | -0.08 | 0.00  | 20 UTP--glucose- UGP2            |
| 0.04  | 0.21  | 0.02  | -0.06 | -0.01 | 0.04  | 0.27  | 0.25  | 0.00  | -0.07 | 0.03  | 0.07  | 35 Regulator of n UPF1           |
| -0.08 | -0.02 | 0.17  | 0.34  | 0.07  | -0.02 | 0.19  | 0.12  | 0.01  | 0.05  | 0.32  | 0.19  | 12 Cytochrome b UQCRC1           |
| -0.13 | -0.19 | 0.07  | 0.17  | 0.02  | -0.02 | 0.14  | 0.11  | 0.05  | 0.05  | 0.37  | 0.30  | 15 Cytochrome b UQCRC2           |
| 0.06  | -0.01 | 0.10  | 0.10  | 0.03  | -0.02 | 0.06  | 0.17  | -0.22 | -0.17 | 0.31  | 0.27  | 8 Cytochrome b UQCRFS1;UQCRFS1P1 |
| 0.17  | 0.12  | -0.02 | 0.08  | 0.01  | -0.03 | -0.20 | -0.10 | 0.04  | 0.14  | -0.19 | -0.10 | 23 General vesicle USO1          |
| 0.04  | 0.10  | 0.01  | 0.01  | 0.05  | 0.17  | -0.01 | 0.01  | -0.03 | 0.12  | -0.23 | -0.01 | 8 Ubiquitin carboxyl USP14       |
| 0.02  | 0.17  | -0.23 | -0.13 | 0.03  | 0.09  | 0.15  | 0.19  | -0.03 | 0.06  | -0.07 | 0.27  | 20 Ubiquitin carboxyl USP7       |
| 0.10  | 0.28  | -0.19 | -0.76 | 0.15  | 0.43  | -0.12 | 0.12  | 0.23  | 0.02  | 0.00  | 0.32  | 38 Probable ubiquitin USP9X      |
| -0.01 | -0.11 | 0.22  | 0.17  | -0.02 | 0.07  | -0.09 | 0.09  | 0.52  | 0.33  | -0.13 | -0.27 | 5 Vesicle-associated VAMP3       |
| -0.28 | -0.13 | 0.30  | 0.41  | -0.15 | -0.14 | -0.27 | 0.02  | -0.51 | -0.04 | -0.11 | 0.10  | 7 Vesicle-associated VAMP8       |
| -0.16 | 0.06  | -0.02 | 0.14  | 0.00  | 0.11  | 0.03  | 0.20  | -0.13 | 0.03  | -0.08 | 0.03  | 13 Vesicle-associated VAPA       |
| 0.28  | 0.41  | -0.21 | 0.06  | -0.25 | -0.09 | 0.86  | 1.13  | -0.35 | -0.13 | -0.73 | -0.48 | 11 Vesicle-associated VAPB       |
| -0.26 | 0.12  | -0.33 | 0.10  | -0.17 | -0.06 | -0.03 | -0.04 | 0.06  | 0.09  | -0.03 | 0.11  | 44 Valine--tRNA Val VARS         |
| -0.04 | -0.03 | -0.01 | 0.06  | -0.03 | 0.16  | -0.25 | -0.17 | -0.27 | -0.05 | -0.10 | -0.11 | 15 Vasodilator-stimulated VASP   |
| -0.12 | 0.27  | -0.12 | 0.34  | -0.14 | -0.15 | -0.33 | 0.06  | 0.12  | 0.17  | -0.37 | -0.12 | 13 Synaptic vesicle VAT1         |
| -0.08 | 0.07  | 0.30  | 0.00  | -0.02 | 0.18  | -0.01 | -0.01 | -0.06 | -0.02 | -0.12 | 0.00  | 11 Prefoldin subunit VBP1        |
| 0.01  | -0.28 | -0.16 | -0.08 | 0.05  | 0.00  | -0.17 | -0.18 | -0.15 | -0.09 | -0.03 | -0.09 | 73 Vinculin VCL                  |
| -0.10 | -0.02 | -0.06 | 0.12  | -0.14 | -0.04 | -0.03 | 0.07  | -0.08 | 0.07  | -0.08 | -0.01 | 59 Transitional endosome VCP     |
| -1.23 | -1.20 | -1.34 | -1.27 | 0.15  | -0.24 | -0.69 | -0.53 | 0.91  | 1.59  | -0.25 | -0.28 | 13 Voltage-dependent VDAC1       |
| -1.87 | -1.37 | -1.35 | -1.22 | 0.12  | -0.24 | -0.64 | -0.40 | 1.03  | 1.70  | -0.16 | -0.04 | 13 Voltage-dependent VDAC2       |
| 1.69  | -1.71 | -0.46 | -2.51 | 0.38  | 1.28  | -2.14 | -2.21 | -0.25 | -1.67 | -0.36 | -2.87 | 38 Vimentin VIM                  |
| 0.18  | -0.01 | 0.15  | 0.18  | 0.13  | 0.22  | 0.23  | 0.35  | 0.10  | 0.09  | -0.03 | 0.21  | 18 Vacuolar protein VPS13C       |
| -0.27 | -0.07 | -0.12 | 0.07  | 0.04  | 0.05  | -0.06 | 0.15  | 0.08  | 0.10  | -0.23 | -0.12 | 7 Vacuolar protein VPS26A        |
| 0.05  | 0.06  | 0.24  | 0.27  | 0.12  | 0.14  | 0.00  | 0.17  | 0.00  | 0.12  | 0.00  | 0.06  | 5 Vacuolar protein VPS29         |
| 0.19  | 0.01  | 0.01  | 0.12  | 0.04  | -0.03 | 0.14  | 0.30  | -0.02 | -0.06 | -0.08 | 0.02  | 18 Vacuolar protein VPS35        |
| -0.11 | 0.24  | 0.54  | 0.38  | -0.30 | -0.15 | 0.23  | -0.08 | 0.09  | -0.09 | -0.06 | 0.01  | 5 Vacuolar protein VPS4B         |
| 0.03  | -0.20 | -0.05 | 0.10  | -0.35 | -0.38 | -0.62 | -0.58 | -0.08 | 0.16  | -0.62 | -0.56 | 15 Tryptophan--tryptophan WARS   |
| -0.03 | -0.11 | -0.16 | 0.01  | -0.25 | -0.03 | -0.06 | 0.24  | 0.00  | 0.12  | -0.07 | 0.29  | 18 WD repeat-coiled WDR1         |
| -0.21 | -0.27 | 0.15  | 0.05  | -0.13 | -0.16 | -0.18 | 0.04  | -0.11 | -0.11 | -0.31 | 0.04  | 12 WD repeat-coiled WDR44        |
| 0.15  | 0.92  | 0.06  | 0.24  | -0.06 | 0.16  | 0.20  | 0.37  | -0.12 | -0.40 | 0.38  | 0.47  | 13 Serine/threonine WNK1         |
| 0.09  | 0.13  | 0.11  | 0.03  | 0.11  | 0.17  | 0.21  | 0.27  | -0.01 | -0.12 | 0.02  | 0.08  | 37 Exportin-1 XPO1               |
| -0.15 | -0.21 | 0.05  | -0.48 | 0.02  | -0.06 | 0.41  | 0.24  | -0.09 | -0.32 | -0.02 | -0.27 | 12 Exportin-5 XPO5               |
| 0.16  | 0.18  | 0.03  | 0.00  | 0.13  | 0.06  | -0.08 | -0.19 | -0.08 | -0.20 | 0.16  | 0.15  | 36 X-ray repair crosslink XRCC5  |
| 0.13  | 0.09  | 0.06  | -0.06 | 0.08  | 0.00  | -0.06 | -0.16 | 0.00  | -0.19 | 0.11  | 0.04  | 23 X-ray repair crosslink XRCC6  |
| 0.26  | -0.08 | 0.13  | -0.94 | 0.06  | 0.17  | 0.24  | -0.09 | -0.30 | -0.34 | -0.79 | -0.52 | 12 5-3 exoribonuclease XRN2      |
| 0.06  | 0.04  | -0.15 | 0.01  | -0.20 | 0.02  | -0.59 | -0.53 | -0.10 | 0.20  | -0.01 | 0.20  | 22 Tyrosine--tryptophan YARS     |
| -0.12 | -0.22 | 0.09  | -0.17 | -0.02 | 0.00  | 0.00  | -0.11 | -0.02 | -0.06 | -0.07 | -0.19 | 17 Nuclease-sensitized YBX1      |
| -0.45 | -0.22 | 0.54  | -0.13 | -0.19 | -0.05 | 0.14  | 0.09  | 0.05  | 0.00  | -0.16 | -0.11 | 11 Y-box-binding YBX3            |
| 0.13  | 0.22  | 0.04  | 0.03  | 0.07  | 0.06  | -0.10 | -0.17 | -0.37 | -0.09 | 0.11  | 0.16  | 7 Synaptobrevin YKT6             |
| 0.46  | 0.35  | -0.05 | -0.14 | -0.14 | -0.15 | 0.56  | 0.72  | -0.19 | -0.09 | -0.35 | -0.26 | 21 14-3-3 protein YWHAB          |
| 0.00  | -0.03 | -0.08 | -0.02 | -0.01 | -0.06 | 0.18  | 0.17  | 0.02  | -0.02 | 0.01  | 0.02  | 27 14-3-3 protein YWHAE          |
| -0.03 | 0.05  | 0.09  | 0.08  | -0.01 | -0.08 | -0.03 | 0.05  | 0.17  | 0.15  | -0.17 | -0.06 | 21 14-3-3 protein YWHAG          |
| 0.01  | -0.30 | -0.16 | -0.18 | 0.14  | 0.07  | -0.79 | -0.73 | 0.14  | 0.15  | -0.15 | -0.09 | 17 14-3-3 protein YWHAH          |
| -0.10 | 0.07  | -0.21 | 0.08  | 0.04  | 0.02  | 0.34  | 0.46  | 0.18  | 0.24  | 0.11  | 0.26  | 21 14-3-3 protein YWHAQ          |
| -0.16 | 0.06  | 0.02  | 0.24  | -0.04 | -0.06 | 0.14  | 0.37  | 0.18  | 0.30  | -0.04 | 0.20  | 29 14-3-3 protein YWHAZ          |
| -0.52 | -0.76 | 0.01  | -0.07 | 0.04  | 0.05  | -0.35 | -0.51 | -0.48 | -0.60 | -0.09 | -0.12 | 15 Zyxin ZYX                     |
